# Supplementary material for: Regionally Distinct Astrocytes Display Unique Transcription Factor Profiles in the Adult Brain
Source: Front Neurosci. 2020 Feb 21;14:61. doi: 10.3389/fnins.2020.00061 (PMC7046629; doi:10.3389/fnins.2020.00061)
Supplement: Supplementary file 1 [file Data_Sheet_1.xlsx]

## Sheet: OB_specific_DEGs
baseMean	log2FoldChange	lfcSE	stat	pvalue	padj	ExtrezID	GeneSymbol
42.8759	9.26693	0.850827	10.8917	1.26302e-27	2.1066e-24	18378	Omp
23.1751	8.74039	0.970614	9.00501	2.15642e-19	1.58255e-16	20199	S100a5
28.7066	8.69014	0.826299	10.5169	7.21791e-26	1.01867e-22	229277	Stoml3
72.9831	8.02333	0.647952	12.3826	3.2469e-35	8.51014e-32	320145	Sp8
18.6161	7.67897	0.956043	8.03203	9.58696e-16	3.74238e-13	16997	Ltbp2
67.7759	7.47999	0.736564	10.1552	3.14039e-24	3.84112e-21	170677	Cdhr1
6.75928	6.96381	1.23072	5.65833	1.52856e-08	1.66932e-06	329093	Cpa6
210.336	6.91487	0.557797	12.3968	2.72125e-35	8.32113e-32	109648	Npy
8.62248	6.90914	1.29582	5.33186	9.721e-08	8.82927e-06	22044	Trh
10.4561	6.82811	1.00831	6.77186	1.27134e-11	2.95257e-09	330096	Shisa3
46.2234	6.82487	1.42219	4.79884	1.59587e-06	9.79248e-05	20698	Sphk1
6.0354	6.79632	1.40452	4.8389	1.30558e-06	8.28842e-05	545279	Ms4a15
126.849	6.77935	1.60573	4.22198	2.42162e-05	0.00102846	12722	Clca3a1
6.92139	6.60437	1.24948	5.28571	1.25217e-07	1.08879e-05	239852	Zpld1
8.64053	6.56325	1.12341	5.84223	5.15056e-09	6.3421e-07	14657	Glra4
4.95263	6.51823	1.32729	4.91095	9.06371e-07	6.13623e-05	18095	Nkx3-1
4.92567	6.5067	1.33187	4.88538	1.03228e-06	6.86204e-05	18331	Olfr32
4.35885	6.32134	1.57316	4.01824	5.86339e-05	0.00218206	100039953	Gfy
25.7851	6.23405	0.633234	9.84477	7.2206e-23	6.97244e-20	22045	Trhr
65.3771	6.12379	1.61346	3.79544	0.000147383	0.00471908	104271	Tex15
200.408	6.03063	0.515206	11.7053	1.19777e-31	2.44172e-28	20378	Frzb
18.3154	5.91679	0.879913	6.7243	1.76443e-11	3.90024e-09	276829	Smtnl2
41.727	5.87716	0.705336	8.33243	7.91978e-17	3.72575e-14	14765	Gpr50
5.25179	5.73309	1.25932	4.55253	5.30054e-06	0.000279451	80797	Clca3a2
51.0858	5.72909	0.569148	10.0661	7.80247e-24	8.94699e-21	242653	Cldn19
5.22359	5.71696	1.39458	4.09942	4.14189e-05	0.00160658	110834	Chrna3
6.38406	5.67478	1.07533	5.27723	1.31154e-07	1.12971e-05	213945	Col28a1
9.02897	5.63475	1.30654	4.31274	1.61245e-05	0.000723315	16165	Il13ra2
2.66349	5.61935	1.70434	3.29709	0.000976921	0.0204841	333315	Frem3
6.19632	5.60622	1.17703	4.76303	1.90704e-06	0.000113599	65086	Lpar3
2.62649	5.59371	1.78908	3.12659	0.00176846	0.0322204	21990	Tph1
5.848	5.5166	1.20036	4.59577	4.31154e-06	0.000234035	16534	Kcnn4
2.44097	5.48715	1.73747	3.15813	0.00158785	0.0297572	76757	Trdn
5.21498	5.4864	1.11925	4.90185	9.49389e-07	6.40384e-05	77798	A930009A15Rik
8.39823	5.30035	1.14227	4.6402	3.48066e-06	0.000193514	13395	Dlx5
8.09948	5.29984	1.04277	5.08246	3.72581e-07	2.80276e-05	246049	Slc36a2
3.86504	5.25331	1.36897	3.83741	0.000124339	0.00411034	75369	4930563F08Rik
8.24343	5.25253	0.94432	5.56224	2.66341e-08	2.71475e-06	100038575	Gm10635
2.06089	5.23879	1.93257	2.71079	0.00671241	0.0868387	243655	Klre1
6.5486	5.23619	1.15064	4.55066	5.34769e-06	0.000281129	74363	4931430N09Rik
14.3255	5.21374	1.20952	4.31058	1.62824e-05	0.000728618	15221	Foxd3
6.70483	5.1211	1.21544	4.21335	2.51609e-05	0.00106121	15557	Htr1f
57.2149	5.08671	0.818059	6.21803	5.03436e-10	8.47389e-08	11695	Alx4
19.9318	5.08284	0.595325	8.53792	1.36663e-17	7.83549e-15	385354	Frmd7
19.0257	5.07186	1.05602	4.80282	1.56445e-06	9.71553e-05	11694	Alx3
2.76365	5.0448	1.53946	3.27699	0.00104919	0.0216508	NA	A230065H16Rik
4.28585	5.00511	1.39656	3.58389	0.000338509	0.00909316	100038752	Gm10825
8.17364	4.91812	1.29735	3.79089	0.000150105	0.00479374	NA	Wisp1
2.24207	4.8554	1.71623	2.8291	0.00466785	0.0672118	70194	2310075C17Rik
35.1602	4.8175	0.783748	6.14675	7.90847e-10	1.24014e-07	NA	Fam196b
2.51442	4.77614	1.38187	3.4563	0.000547647	0.0132906	12836	Col7a1
2.65905	4.76777	1.45461	3.2777	0.00104656	0.0216388	73902	Psmb11
43.0809	4.69442	0.595794	7.87926	3.29322e-15	1.23307e-12	24052	Sgcd
2.58439	4.65705	1.59417	2.9213	0.00348571	0.0529407	104443	Npffr2
2.6582	4.61021	1.64092	2.80954	0.00496126	0.0699649	NA	Mtap7d3
6.35911	4.60793	1.37146	3.35987	0.000779804	0.0174207	71355	Col24a1
2.33205	4.52381	1.65076	2.74044	0.00613578	0.0813978	14313	Fst
15.7631	4.51382	1.1735	3.84645	0.00011984	0.00399765	60425	Doc2g
97.6943	4.50209	0.537736	8.3723	5.65048e-17	2.72814e-14	14706	Gng4
36.3401	4.498	0.820846	5.47972	4.25999e-08	4.20204e-06	58207	Slc43a3
54.9522	4.46674	0.756257	5.90638	3.49715e-09	4.51846e-07	NA	Aim1
15.2817	4.37491	1.04669	4.17976	2.91811e-05	0.00119773	78449	2700046A07Rik
7.01781	4.37449	1.32193	3.30916	0.000935751	0.0198572	13392	Dlx2
490.045	4.32625	0.445411	9.71293	2.65595e-22	2.32041e-19	26968	Islr
5.43807	4.30792	1.52079	2.83269	0.00461578	0.0666816	75243	4930549C15Rik
9.44403	4.27792	0.886298	4.82673	1.38797e-06	8.72089e-05	22420	Wnt6
4.25503	4.27124	1.54891	2.75757	0.00582323	0.0787798	22409	Wnt10a
7.38178	4.24652	1.42519	2.97963	0.00288601	0.0463369	13813	Eomes
18.3878	4.22965	0.884674	4.78102	1.74404e-06	0.000105953	69217	Plekha4
328.921	4.21223	0.33443	12.5953	2.24214e-36	8.2273e-33	20370	Sez6
8.27833	4.13843	1.43839	2.87712	0.00401323	0.05962	665268	1600029O15Rik
24.6453	4.05068	0.580677	6.97579	3.04163e-12	7.85983e-10	65969	Cubn
5.81038	3.96862	1.4123	2.81003	0.00495365	0.0699112	268482	Krt12
51.0075	3.95859	0.506205	7.82013	5.27694e-15	1.93632e-12	268527	Greb1
15.8398	3.9529	1.22158	3.23589	0.00121264	0.0242243	225872	Npas4
4595.04	3.94372	0.301941	13.0612	5.48321e-39	2.51501e-35	12140	Fabp7
94.8362	3.94364	0.464752	8.48548	2.14831e-17	1.19439e-14	208748	Prrg3
4.74034	3.94342	1.20698	3.26717	0.00108627	0.0222183	16891	Lipg
1647.4	3.91669	0.292828	13.3754	8.41991e-41	7.72401e-37	103712	6330403K07Rik
5.52497	3.89157	1.40361	2.77254	0.00556212	0.0762692	240322	Adamts19
112.795	3.88118	0.440938	8.80211	1.34268e-18	8.79792e-16	13193	Dcx
23.0333	3.87348	0.61069	6.34279	2.25634e-10	4.01914e-08	98741	Kcnb2
172.371	3.83843	0.673352	5.70048	1.19468e-08	1.35301e-06	15478	Hs3st3a1
4.80132	3.82031	1.08546	3.51952	0.000432322	0.0110934	12921	Crhr1
171.239	3.81026	0.43686	8.72193	2.73499e-18	1.67263e-15	76453	Prss23
7.99403	3.79917	1.0031	3.78745	0.000152203	0.00483962	68144	5031426D15Rik
6.31784	3.77363	1.09756	3.4382	0.000585593	0.013935	12839	Col9a1
8.08452	3.77326	1.253	3.01138	0.0026006	0.0427921	238680	Cntnap3
70.6737	3.74522	0.465909	8.03851	9.09373e-16	3.62702e-13	654805	F930015N05Rik
12.8848	3.74265	0.88224	4.24221	2.21329e-05	0.000953223	239096	Cdh24
3628.45	3.74092	0.33144	11.2869	1.52357e-29	2.79529e-26	239217	Kctd12
33.6184	3.73329	0.716311	5.21184	1.86981e-07	1.53836e-05	320563	Islr2
2.82289	3.72837	1.40413	2.65529	0.00792401	0.0967922	320354	Grin1os
12.5355	3.70819	0.615795	6.0218	1.72493e-09	2.4344e-07	64337	Gng13
3.3744	3.68907	1.26044	2.92681	0.00342458	0.0523153	332579	Card9
16.2157	3.64163	0.982454	3.70667	0.00021	0.00622436	272636	Esyt3
629.179	3.61104	0.444806	8.11823	4.7304e-16	1.97247e-13	17096	Lyn
74.9181	3.60361	0.564093	6.38833	1.6771e-10	3.0465e-08	109594	Lmo1
14.4496	3.59773	0.96268	3.73721	0.000186076	0.00565221	12767	Cxcr4
278.81	3.58353	0.447509	8.00773	1.16847e-15	4.46625e-13	20317	Serpinf1
61.5213	3.57309	0.533561	6.69669	2.13189e-11	4.60163e-09	245650	Gucy2f
31.0514	3.56823	0.623902	5.71922	1.07017e-08	1.21953e-06	72293	Nkd2
2.64742	3.52946	1.28765	2.74102	0.00612496	0.0813719	100502829	Gm9899
961.238	3.50696	0.267791	13.0959	3.47577e-39	2.12567e-35	20356	Sema5a
11.7424	3.50583	1.35789	2.58181	0.00982833	0.11263	240327	Gm4951
12.6072	3.50029	1.01448	3.45034	0.000559886	0.0134826	13390	Dlx1
5.89107	3.50007	1.32828	2.63505	0.00841254	0.100485	80893	Tmprss5
34.0577	3.46103	1.333	2.59642	0.00942012	0.109595	20311	Cxcl5
67.7316	3.4492	0.550226	6.26869	3.6409e-10	6.24295e-08	19277	Ptpro
5.44222	3.44651	1.15672	2.97955	0.00288674	0.0463369	15558	Htr2a
20.3105	3.41132	0.498352	6.8452	7.63668e-12	1.84876e-09	23921	Sh2b2
12.759	3.40834	0.955739	3.56618	0.000362227	0.00957605	22355	Vipr2
9.4063	3.39045	1.21648	2.7871	0.00531823	0.0734934	243764	Chrm2
129.626	3.37769	0.406646	8.30622	9.87977e-17	4.5316e-14	14415	Gad1
97.4313	3.37103	0.542675	6.21187	5.23584e-10	8.58449e-08	NA	Fam84a
56.4729	3.32272	0.534911	6.21173	5.24044e-10	8.58449e-08	17295	Met
48.288	3.32263	0.505928	6.56739	5.12053e-11	1.02319e-08	213262	Fstl5
4.83396	3.30383	1.22121	2.70537	0.00682284	0.0875375	436240	Foxr2
76.9307	3.29224	0.53511	6.15245	7.62958e-10	1.20672e-07	72003	Synpr
153.8	3.28801	0.647264	5.07986	3.77719e-07	2.82858e-05	14807	Grik3
2703.28	3.27893	0.330869	9.91006	3.76401e-23	4.06226e-20	107831	Adgrb1
42.9064	3.27216	1.2498	2.61813	0.00884121	0.104412	320038	Dlx6os1
14.1553	3.2569	0.810821	4.0168	5.89946e-05	0.00219104	12919	Crhbp
8.46021	3.23945	1.09725	2.95234	0.00315374	0.049244	243547	Grip2
185.179	3.22293	0.441391	7.30177	2.84008e-13	8.54211e-11	54710	Hs3st3b1
88.3666	3.21304	0.469414	6.8448	7.65826e-12	1.84876e-09	108151	Sema3d
98.533	3.21083	0.370056	8.67658	4.0783e-18	2.4137e-15	71799	Ptcd1
49.835	3.2056	0.53016	6.04648	1.48049e-09	2.13878e-07	170835	Inpp5j
73.6543	3.20043	0.475486	6.73086	1.68667e-11	3.82041e-09	216028	Lrrtm3
79.7434	3.19648	0.531475	6.01437	1.8059e-09	2.51007e-07	12814	Col11a1
94.3357	3.14417	0.478777	6.56709	5.13071e-11	1.02319e-08	14115	Fbln2
22.3412	3.13704	0.968861	3.23787	0.00120427	0.0241209	67874	Rprm
6.53015	3.12198	1.12063	2.7859	0.00533794	0.0736909	19059	Ppp3r2
46.3601	3.1111	0.368932	8.43273	3.37694e-17	1.72102e-14	217682	Plekhd1
48.0508	3.10415	0.732557	4.23742	2.26104e-05	0.000969286	54524	Syt6
8.91781	3.08953	0.741041	4.16918	3.057e-05	0.00122997	17183	Matn4
37.7674	3.0809	0.598161	5.15062	2.59622e-07	2.08916e-05	NA	Ppapdc1a
37.7949	3.05041	0.8033	3.79735	0.00014625	0.00470745	13867	Erbb3
10.2389	3.0129	0.948401	3.17682	0.00148897	0.0284564	15565	Htr6
301.836	3.00393	0.949321	3.1643	0.00155458	0.0293737	12561	Cdh4
9.85545	2.99299	0.921587	3.24764	0.00116365	0.0235646	12350	Car3
22.6111	2.97255	0.917328	3.24044	0.00119344	0.0239613	230972	Arhgef16
156.145	2.97011	0.588628	5.04581	4.51602e-07	3.32753e-05	12816	Col12a1
167.403	2.96769	0.3	9.89229	4.4961e-23	4.58278e-20	16000	Igf1
74.3342	2.95959	0.597221	4.9556	7.21067e-07	5.0494e-05	56050	Cyp39a1
9.20891	2.93996	0.906726	3.24239	0.00118531	0.0238976	78923	Chsy3
10.7812	2.92622	1.06502	2.74757	0.00600385	0.0805209	17285	Meox1
135.099	2.92185	0.411881	7.09393	1.30357e-12	3.62373e-10	320405	Cadps2
195.213	2.91971	0.504527	5.78703	7.16429e-09	8.43454e-07	13640	Efna5
1775.92	2.91602	0.766123	3.80621	0.000141113	0.0045501	72555	Shisa9
34.3225	2.9099	0.612528	4.75064	2.02776e-06	0.000119625	70536	Qpct
4.99592	2.90032	0.963046	3.01161	0.00259869	0.0427921	53604	Zpbp
24.3513	2.89752	0.674401	4.29644	1.73561e-05	0.000767308	12308	Calb2
28.0858	2.88976	0.729684	3.96029	7.48586e-05	0.00269408	94191	Adarb2
20.7908	2.88571	0.638019	4.52292	6.09913e-06	0.000317	633285	Rbm46
52.1585	2.88332	0.825865	3.49127	0.000480735	0.0119837	17380	Mme
5.1904	2.83145	1.08647	2.6061	0.00915797	0.107156	434064	Gm5577
250.925	2.81311	0.546527	5.14726	2.64324e-07	2.09845e-05	15360	Hmgcs2
16.4236	2.78858	1.01488	2.74769	0.00600161	0.0805209	13417	Dnah8
66.5186	2.77907	0.573665	4.8444	1.26992e-06	8.1466e-05	668303	Kif26a
186.091	2.77804	0.307108	9.04582	1.48547e-19	1.13558e-16	11488	Adam11
15.7504	2.77198	0.872885	3.17566	0.00149497	0.0285211	381373	Sp9
97.3237	2.76948	0.328359	8.4343	3.33183e-17	1.72102e-14	21898	Tlr4
22.7355	2.71641	0.801027	3.39116	0.00069597	0.0159812	12142	Prdm1
51.0089	2.71591	0.540033	5.02916	4.92627e-07	3.57242e-05	12362	Casp1
302.571	2.70059	0.194166	13.9086	5.6132e-44	1.02985e-39	67763	Prpsap1
27.4556	2.68253	0.935266	2.8682	0.00412808	0.0608337	382571	Kcnf1
31.1445	2.68231	0.532643	5.03586	4.75707e-07	3.46341e-05	16492	Kcna4
47.3626	2.67334	0.697925	3.83041	0.00012793	0.00419881	319713	Ablim3
89.1962	2.6541	0.415196	6.3924	1.63302e-10	2.9961e-08	626578	Gbp10
57.7485	2.63111	0.629995	4.1764	2.96155e-05	0.00120478	101772	Ano1
65.7125	2.63102	0.531756	4.9478	7.50557e-07	5.21609e-05	18053	Ngfr
421.55	2.60235	0.267711	9.72077	2.45915e-22	2.2559e-19	56543	Kcnd3
32.5681	2.59684	0.94629	2.74423	0.00606532	0.0808722	12160	Bmp5
72.0102	2.57136	0.440308	5.83991	5.22288e-09	6.37062e-07	14537	Gcnt1
129.674	2.56171	0.424246	6.03827	1.55774e-09	2.2328e-07	100702	Gbp6
6.46601	2.55076	0.776112	3.28659	0.0010141	0.0210948	13388	Dll1
139.098	2.49704	0.96637	2.58393	0.00976806	0.112079	140723	Cacng5
81.182	2.49554	0.598676	4.16843	3.06703e-05	0.00123131	74020	Cpne4
135.226	2.49027	0.633299	3.93222	8.41637e-05	0.00298099	20357	Sema5b
24.2714	2.48942	0.955077	2.60651	0.00914692	0.107156	70357	Kcnip1
9.38761	2.48799	0.906344	2.74508	0.00604954	0.0807794	100039596	Tcf24
170.33	2.48126	0.409335	6.06169	1.34698e-09	1.96135e-07	20716	Serpina3n
7.04657	2.47406	0.928795	2.66373	0.00772803	0.0950499	104103	Airn
115.665	2.44522	0.726587	3.36536	0.000764447	0.0171879	68655	Fndc1
21.6496	2.43751	0.802952	3.03568	0.00239992	0.0404408	270049	Galntl6
148.449	2.4216	0.428376	5.65299	1.57684e-08	1.71185e-06	21844	Tiam1
11.9357	2.40748	0.630996	3.81536	0.000135985	0.00442361	320027	Fstl4
92.6078	2.4013	0.376293	6.38148	1.7539e-10	3.15478e-08	96935	Susd4
5.68592	2.39211	0.896065	2.66957	0.00759482	0.0944052	11682	Alk
194.132	2.38407	0.470831	5.06352	4.11579e-07	3.04485e-05	70546	Zdhhc2
125.151	2.37327	0.640488	3.7054	0.000211055	0.00623547	23962	Oasl2
15.5159	2.37288	0.771246	3.07668	0.00209318	0.0367849	11540	Adora2a
17.8973	2.37061	0.645488	3.67258	0.000240114	0.00695951	76933	Ifi27l2a
16.2516	2.36336	0.874716	2.70186	0.00689518	0.0880961	20514	Slc1a5
88.0798	2.34147	0.412328	5.67865	1.35761e-08	1.50958e-06	59095	Fxyd6
147.203	2.33847	0.388588	6.01785	1.76747e-09	2.47541e-07	12289	Cacna1d
87.7995	2.33843	0.442286	5.28714	1.24246e-07	1.08879e-05	78593	Nrip3
11.3149	2.33187	0.593002	3.93232	8.41302e-05	0.00298099	140703	Emid1
140.959	2.33087	0.328396	7.09776	1.26796e-12	3.57896e-10	237759	Col23a1
410.15	2.33078	0.262447	8.88094	6.62985e-19	4.5051e-16	228911	Tshz2
77.713	2.32573	0.586124	3.96798	7.24853e-05	0.00262305	15957	Ifit1
7.25291	2.31261	0.835874	2.7667	0.00566276	0.0772451	100628571	Mir378b
11.7073	2.28988	0.684006	3.34775	0.000814703	0.0180089	67441	Isoc2b
153.726	2.2801	0.394014	5.78685	7.17168e-09	8.43454e-07	217258	Abca8a
147.467	2.27779	0.293682	7.75599	8.76554e-15	3.15336e-12	319670	Eml5
77.4978	2.2754	0.473904	4.8014	1.57557e-06	9.73301e-05	14586	Gfra2
188.143	2.26129	0.28001	8.07574	6.70706e-16	2.73454e-13	15214	Hey2
14.6536	2.25442	0.749694	3.00712	0.00263732	0.0432412	109198	6030407O03Rik
89.2938	2.25187	0.461164	4.883	1.04482e-06	6.92032e-05	NA	Lppr5
8.4435	2.24123	0.84823	2.64224	0.00823595	0.0993458	55991	Panx1
25.3184	2.24072	0.669696	3.34588	0.00082022	0.018109	170571	Cntnap4
151.669	2.23379	0.46912	4.76165	1.92018e-06	0.000114011	18516	Pbx3
19.151	2.2255	0.749696	2.96854	0.00299219	0.0474073	26358	Aldh1a7
102.073	2.22107	0.401512	5.53176	3.17036e-08	3.21363e-06	99586	Dpyd
93.4009	2.1836	0.474026	4.60649	4.09524e-06	0.000223617	244281	Myo16
58.5183	2.18124	0.374245	5.82838	5.5967e-09	6.75544e-07	235281	Scn3b
67.0959	2.17974	0.548045	3.9773	6.97032e-05	0.00253236	269109	Dpp10
10.4951	2.17954	0.744377	2.92801	0.00341141	0.0522012	78748	Rassf10
10.4064	2.16604	0.751221	2.88336	0.00393459	0.0586893	22095	Tshr
211.748	2.14047	0.39989	5.35266	8.66702e-08	8.031e-06	14261	Fmo1
23.7449	2.13786	0.662422	3.22734	0.00124945	0.0247289	319642	Rab9b
8.70161	2.13432	0.787809	2.70918	0.00674494	0.086944	791318	Gm10125
21.259	2.12739	0.643631	3.30529	0.000948777	0.0200313	268755	Mir124a-1hg
19.4696	2.12711	0.813312	2.61537	0.00891315	0.104759	108068	Grm2
49.5325	2.12651	0.705515	3.01412	0.00257725	0.0426373	16440	Itpr3
105.199	2.12553	0.44292	4.7989	1.59542e-06	9.79248e-05	66871	Cpne8
24.0574	2.12075	0.695524	3.04914	0.00229496	0.0393511	20963	Syk
238.548	2.11944	0.305688	6.93335	4.10994e-12	1.04729e-09	53623	Gria3
46.9032	2.11898	0.529199	4.00413	6.2246e-05	0.0022795	219134	Shisa2
677.473	2.11756	0.251636	8.41517	3.92317e-17	1.94536e-14	268902	Robo2
37.2329	2.11487	0.65089	3.24919	0.00115734	0.0234627	243499	Lrrtm4
11.3977	2.11475	0.763595	2.76946	0.00561489	0.0768206	66889	Rnf128
226.772	2.10745	0.499828	4.21634	2.48295e-05	0.00105207	12704	Cit
92.8491	2.10384	0.373486	5.63298	1.77127e-08	1.91161e-06	NA	C77370
17.3278	2.09853	0.534486	3.92625	8.62798e-05	0.00303252	13641	Efnb1
27.3653	2.08674	0.774408	2.69463	0.00704667	0.0895781	99899	Ifi44
77.6442	2.08404	0.35037	5.94811	2.71262e-09	3.58047e-07	271849	Shc4
15.9137	2.07737	0.666289	3.11783	0.00182189	0.0330953	241624	Exd1
158.737	2.07463	0.28024	7.40305	1.3309e-13	4.28385e-11	22169	Cmpk2
17.8198	2.06989	0.620126	3.33785	0.0008443	0.0185408	330173	2610524H06Rik
26.6739	2.05971	0.722976	2.84894	0.00438656	0.0639747	60440	Iigp1
9.6976	2.05912	0.764859	2.69216	0.00709913	0.0899418	406217	Bex4
2051.54	2.05765	0.797473	2.58021	0.00987404	0.113066	11815	Apod
38.2002	2.0474	0.584971	3.5	0.000465263	0.011691	11622	Ahr
469.652	2.00696	0.477623	4.20198	2.6459e-05	0.00110884	80892	Zfhx4
305.057	1.99773	0.324387	6.15849	7.34437e-10	1.17171e-07	67087	Ctnnbip1
9.60261	1.99412	0.727591	2.74071	0.00613057	0.0813875	58212	Srrm3
77.9703	1.98881	0.626854	3.17268	0.00151038	0.028716	58178	Sorcs1
409.323	1.96588	0.537589	3.65684	0.000255339	0.00735434	13839	Epha5
27.486	1.95388	0.604685	3.23123	0.00123258	0.0245007	12563	Cdh6
35.4948	1.95007	0.591935	3.2944	0.000986328	0.0205872	66895	Pxdc1
1316.49	1.94697	0.270994	7.18454	6.74345e-13	1.93316e-10	14457	Gas7
87.9641	1.94528	0.391994	4.96251	6.95872e-07	4.91045e-05	76965	Slitrk1
67.7426	1.94471	0.426643	4.55817	5.16004e-06	0.000273616	233733	Galnt18
56.7714	1.94262	0.688712	2.82065	0.00479261	0.0686416	109593	Lmo3
355.533	1.93923	0.569227	3.40678	0.000657351	0.0152471	208151	Tmem132b
23.5079	1.93506	0.473944	4.08289	4.44785e-05	0.00170365	NA	Epb4.1l4b
132.417	1.93293	0.287398	6.72562	1.74848e-11	3.90024e-09	226250	Afap1l2
70.9961	1.92265	0.557569	3.44827	0.000564187	0.0135664	16775	Lama4
990.635	1.91971	0.51396	3.73514	0.000187612	0.00568945	71760	Etnppl
139.508	1.91252	0.386441	4.94907	7.4568e-07	5.2019e-05	16519	Kcnj3
52.1403	1.90634	0.521966	3.65224	0.000259962	0.00744075	80883	Ntng1
34.3028	1.89816	0.409941	4.63031	3.65115e-06	0.00020177	56264	Cpxm1
30.4967	1.89398	0.633114	2.99154	0.00277577	0.0449489	20503	Slc16a7
42.8679	1.89095	0.47749	3.96019	7.48887e-05	0.00269408	19240	Tmsb10
155.98	1.86882	0.533865	3.50056	0.000464289	0.011691	22773	Zic3
291.634	1.85981	0.492384	3.77715	0.000158636	0.00500945	18191	Nrxn3
67.6361	1.85598	0.613307	3.02618	0.00247667	0.0414973	109349	Fam163b
47.3584	1.84218	0.376448	4.89359	9.90132e-07	6.6058e-05	210801	Unc5d
23.2208	1.83627	0.67951	2.70234	0.00688532	0.0880314	237553	Trhde
33.4191	1.83411	0.510528	3.59257	0.000327432	0.00884742	71864	Fam217a
57.4199	1.83321	0.590999	3.10188	0.00192296	0.0345646	57875	Angptl4
24.0796	1.82505	0.607471	3.00433	0.00266163	0.0433744	52829	Lurap1l
41.8296	1.82395	0.63531	2.87096	0.00409228	0.0604517	331461	Il1rapl1
84.6429	1.81875	0.662441	2.74553	0.0060414	0.0807294	12424	Cck
187.228	1.81176	0.337138	5.37393	7.70381e-08	7.2483e-06	109264	Me3
212.953	1.80883	0.593852	3.04593	0.00231965	0.0396263	18073	Nid1
84.7063	1.8079	0.631922	2.86096	0.00422365	0.0620923	19091	Prkg1
29.2462	1.79423	0.662157	2.70968	0.00673486	0.086944	NA	Fam198b
44.1478	1.78217	0.520801	3.42197	0.000621684	0.0146796	20269	Scn3a
46.6338	1.77738	0.584265	3.04207	0.00234954	0.039914	60344	Fign
180.035	1.77566	0.460284	3.85774	0.000114441	0.00386675	16502	Kcnc1
40.2868	1.77545	0.600872	2.95478	0.00312889	0.0490229	239556	Cacna1i
108.966	1.77385	0.412401	4.30127	1.6982e-05	0.000756233	338370	Nalcn
42.215	1.77115	0.549729	3.22186	0.0012736	0.0251109	67775	Rtp4
13746.8	1.77071	0.428226	4.135	3.54954e-05	0.00139451	243616	Slc6a11
16.0232	1.76758	0.582768	3.03308	0.00242071	0.040671	73420	Ccsap
47.9531	1.75983	0.457965	3.84272	0.000121678	0.00404426	18574	Pde1b
641.757	1.75953	0.193587	9.08908	9.98788e-20	7.96729e-17	170625	Snx18
289.036	1.75208	0.530567	3.30227	0.000959051	0.0202017	NA	Ptchd2
868.888	1.74039	0.358825	4.85023	1.23318e-06	7.94811e-05	242443	Grin3a
57.6428	1.71918	0.437572	3.92891	8.53334e-05	0.00301079	214685	Chadl
829.143	1.71801	0.377014	4.55688	5.19188e-06	0.000274511	114644	Slc13a3
97.5594	1.71651	0.439802	3.90291	9.50439e-05	0.00329635	20665	Sox10
66.0848	1.71396	0.60139	2.85	0.00437188	0.0638622	54377	Cacng4
72.6004	1.70805	0.381186	4.48089	7.43321e-06	0.000372615	19079	Prkab1
125.996	1.69302	0.382157	4.43017	9.41579e-06	0.000458227	15959	Ifit3
58.566	1.69101	0.358732	4.71386	2.4307e-06	0.000140239	320429	Trank1
41.0372	1.68826	0.489308	3.4503	0.000559969	0.0134826	14396	Gabra3
110.907	1.67795	0.287357	5.83926	5.24316e-09	6.37062e-07	76123	Gpsm2
34.2515	1.66656	0.567285	2.93778	0.00330575	0.0509669	107934	Celsr3
587.997	1.66253	0.336378	4.94244	7.71504e-07	5.32375e-05	22352	Vim
97.1637	1.66018	0.411664	4.03286	5.51017e-05	0.00205896	12288	Cacna1c
71.5778	1.65298	0.413795	3.99469	6.4779e-05	0.00236283	76142	Ppp1r14c
49.8637	1.64785	0.376886	4.37226	1.22964e-05	0.000572595	16323	Inhba
200.884	1.64383	0.301179	5.458	4.8153e-08	4.72441e-06	494504	Apcdd1
14.1796	1.64124	0.507028	3.23698	0.001208	0.0241692	66953	Cdca7
183.249	1.63983	0.455049	3.60364	0.000313795	0.00856473	14417	Gad2
95.9922	1.63927	0.293844	5.5787	2.42323e-08	2.5118e-06	13642	Efnb2
18.5294	1.63213	0.611559	2.6688	0.00761226	0.094555	70110	Ifi35
327.232	1.62982	0.306938	5.30992	1.09672e-07	9.85953e-06	74194	Rnd3
121.418	1.62929	0.321187	5.07272	3.92168e-07	2.92484e-05	12724	Clcn2
16.6964	1.62454	0.626067	2.59483	0.00946386	0.109756	67621	Bend5
1301.46	1.61747	0.37979	4.25886	2.05475e-05	0.000893327	14800	Gria2
25.9435	1.6125	0.497522	3.24107	0.00119081	0.0239613	69908	Rab3b
297.52	1.60825	0.620643	2.59126	0.00956253	0.110411	18213	Ntrk3
318.373	1.60646	0.312267	5.14452	2.68212e-07	2.11197e-05	215690	Nav1
228.558	1.60112	0.29567	5.4152	6.12191e-08	5.91151e-06	244668	Sipa1l2
57.1475	1.59909	0.417835	3.82709	0.000129669	0.00423315	100616095	Snhg18
18.6801	1.59297	0.587415	2.71184	0.00669119	0.0866972	67217	L3hypdh
383.299	1.59169	0.208706	7.62648	2.41242e-14	8.35105e-12	218454	Lhfpl2
655.21	1.58807	0.279373	5.68442	1.31254e-08	1.46837e-06	19271	Ptprj
267.421	1.58351	0.366821	4.31684	1.58281e-05	0.000711758	74513	Neto2
100.915	1.57721	0.530333	2.97401	0.0029394	0.0468757	94109	Csmd1
233.248	1.56322	0.333912	4.68152	2.84762e-06	0.000162253	22421	Wnt7a
94.1444	1.56311	0.214529	7.28622	3.18778e-13	9.43326e-11	11877	Arvcf
261.438	1.55557	0.304517	5.10831	3.25056e-07	2.51638e-05	18214	Ddr2
118.727	1.55479	0.512798	3.03197	0.00242965	0.040784	170942	Erdr1
147.085	1.55442	0.540659	2.87505	0.00403966	0.0599156	14812	Grin2b
56.5345	1.5393	0.465106	3.30957	0.000934394	0.0198572	114873	Dscaml1
56.0163	1.53357	0.572467	2.67888	0.00738696	0.092511	207596	Thsd4
199.243	1.53084	0.439577	3.48253	0.000496708	0.0122818	432450	Nkain2
264.649	1.53067	0.374971	4.08211	4.46278e-05	0.0017058	215085	Slc35f1
283.632	1.52727	0.266876	5.72277	1.04801e-08	1.20174e-06	211770	Trib1
191.074	1.51382	0.457877	3.30617	0.000945806	0.0199916	14218	Sh3pxd2a
63.3258	1.51367	0.539591	2.80522	0.00502823	0.0705152	73230	Bmper
85.8086	1.50899	0.535837	2.81613	0.00486058	0.0690942	69269	Scnm1
115.165	1.50492	0.363523	4.13982	3.47574e-05	0.00137359	667370	Ifit3b
704.44	1.49608	0.203048	7.3681	1.73083e-13	5.47508e-11	329628	Fat4
181.841	1.49334	0.319063	4.68041	2.86302e-06	0.000162625	277396	Klhl23
218.776	1.49297	0.279617	5.33934	9.32873e-08	8.55771e-06	17207	Mcf2l
92.8575	1.48507	0.381418	3.89355	9.87882e-05	0.00340689	329942	Csmd2
831.307	1.48158	0.178957	8.27896	1.24252e-16	5.56013e-14	215114	Hip1
24.9355	1.47841	0.51201	2.88746	0.00388362	0.0580234	16913	Psmb8
193.388	1.47429	0.393189	3.74958	0.00017713	0.00545269	12389	Cav1
16.31	1.46064	0.474516	3.07816	0.00208283	0.0366734	104885	Tmem179
257.055	1.4604	0.372132	3.92441	8.69418e-05	0.00304994	224090	Tmem44
31.7139	1.45547	0.474923	3.06465	0.00217928	0.0378989	12291	Cacna1g
68.136	1.4538	0.432104	3.36447	0.000766907	0.0172221	17357	Marcksl1
26.1881	1.44882	0.346837	4.17724	2.95064e-05	0.00120301	71699	Slc41a3
73.3419	1.44645	0.422746	3.42155	0.000622652	0.0146835	214642	Cped1
11.4122	1.44089	0.545547	2.64119	0.00826155	0.0993932	232821	Ccdc106
54.3998	1.44083	0.535112	2.69258	0.00709024	0.0898995	170738	Kcnh7
206.454	1.43949	0.236309	6.09159	1.11796e-09	1.66758e-07	69938	Scrn1
1250.91	1.43707	0.42754	3.36125	0.000775905	0.0173604	227325	Dner
401.807	1.43101	0.227895	6.27925	3.40214e-10	5.88858e-08	78255	Ralgps2
138.057	1.43017	0.367267	3.89407	9.85757e-05	0.00340597	20191	Ryr2
39.0236	1.42654	0.485476	2.93843	0.00329882	0.0509029	238271	Kcnh5
45.4731	1.42511	0.478401	2.97889	0.00289292	0.0463549	16949	Loxl1
45.412	1.42505	0.440061	3.2383	0.00120246	0.0241109	66775	Hacd4
44.628	1.42438	0.518207	2.74867	0.00598373	0.0804275	20349	Sema3e
34.5334	1.42356	0.461244	3.08636	0.00202626	0.035865	NA	Gm684
2543.6	1.42249	0.336544	4.22676	2.37084e-05	0.00101158	277360	Prex1
168.088	1.41671	0.34951	4.05342	5.04745e-05	0.00190546	73341	Arhgef6
63.6511	1.41362	0.395661	3.57282	0.000353163	0.00934989	69352	Necab1
261.573	1.41158	0.472682	2.98633	0.0028235	0.0455209	20254	Scg2
28.3086	1.39949	0.529862	2.64122	0.00826069	0.0993932	319893	A230057D06Rik
21.8471	1.39851	0.496483	2.81683	0.00484999	0.0690859	20450	St8sia2
473.42	1.39726	0.362729	3.85207	0.000117124	0.00392847	227485	Cdh19
34.3751	1.39531	0.501945	2.77981	0.00543914	0.0748065	230837	Asap3
46.6684	1.39422	0.407935	3.41776	0.000631394	0.0148515	67080	1700019D03Rik
44.3962	1.39203	0.469722	2.96352	0.00304144	0.0479393	68955	Srrm4
1231.47	1.38782	0.294104	4.71882	2.37222e-06	0.000137731	17118	Marcks
213.961	1.37637	0.483189	2.84851	0.00439239	0.0640089	21960	Tnr
318.704	1.37276	0.243877	5.6289	1.81362e-08	1.93456e-06	29813	Zfp385a
65.9094	1.37191	0.402165	3.4113	0.000646542	0.0150344	17965	Nbl1
207.244	1.36816	0.478607	2.85862	0.00425488	0.0625015	226518	Nmnat2
34.0736	1.36758	0.399484	3.42336	0.00061852	0.0146237	108672	Zdhhc15
54.2866	1.35932	0.461266	2.94693	0.00320943	0.0498168	384009	Glipr2
141.839	1.35538	0.413334	3.27914	0.00104125	0.0215619	19735	Rgs2
97.5908	1.35468	0.372668	3.63508	0.000277894	0.00780783	NA	Tmem35
224.475	1.35143	0.370703	3.64557	0.000266795	0.00758899	215378	Brinp3
758.764	1.34834	0.282607	4.77109	1.8323e-06	0.000110682	111173	Erc1
438.622	1.34571	0.462833	2.90755	0.0036427	0.0550062	268977	Ltbp1
182.201	1.34377	0.518911	2.58959	0.00960892	0.110712	66141	Ifitm3
15.1526	1.3406	0.478368	2.80244	0.00507169	0.0708926	93843	Pnck
154.919	1.33507	0.252577	5.2858	1.25154e-07	1.08879e-05	231549	Lrrc8d
79.1898	1.33325	0.306256	4.35338	1.34052e-05	0.000616405	209200	Dtx3l
31.9771	1.33104	0.493888	2.69503	0.0070383	0.0895504	216233	Socs2
311.72	1.327	0.399612	3.32071	0.000897874	0.019449	170736	Parvb
48.8827	1.32022	0.421124	3.13499	0.0017186	0.0316261	69675	Pxdn
208.701	1.32004	0.382496	3.45111	0.000558286	0.0134808	73649	Cybrd1
145.487	1.31822	0.408929	3.22358	0.00126599	0.0250214	14086	Fscn1
134.196	1.3168	0.408726	3.22172	0.00127423	0.0251109	327814	Ppfia2
117.17	1.31118	0.364849	3.59376	0.000325942	0.00882015	22240	Dpysl3
82.7573	1.30916	0.347611	3.76616	0.000165777	0.00517265	171463	Il17rd
29.982	1.30882	0.499404	2.62077	0.00877309	0.103778	22717	Zfp59
319.226	1.30621	0.388827	3.35936	0.000781225	0.0174207	207521	Dtx4
112.613	1.30525	0.325301	4.01245	6.00921e-05	0.0022228	64075	Smoc1
185.446	1.3016	0.271028	4.80244	1.56745e-06	9.71553e-05	69151	Lzic
21.2001	1.28771	0.479306	2.68661	0.00721822	0.0909565	72440	Rhno1
101.037	1.28527	0.34326	3.74431	0.000180887	0.00554045	76980	Ube2ql1
131.605	1.28071	0.308321	4.15383	3.26962e-05	0.00130408	20713	Serpini1
40.2962	1.2759	0.443186	2.87893	0.00399021	0.0594224	16590	Kit
83.1233	1.27093	0.241055	5.27237	1.34676e-07	1.15463e-05	53418	B4galt2
127.087	1.26447	0.247157	5.11606	3.11979e-07	2.42537e-05	19221	Ptgfrn
39.522	1.2621	0.481322	2.62215	0.00873778	0.103427	116914	Slc19a2
602.652	1.26088	0.202876	6.21503	5.13153e-10	8.55892e-08	13855	Epn2
321.714	1.25819	0.306499	4.10506	4.0421e-05	0.00157453	279653	Pcdh19
590.968	1.24524	0.393665	3.16321	0.00156042	0.0294173	13612	Edil3
49.9882	1.23648	0.254709	4.8545	1.20694e-06	7.85236e-05	67847	Sncaip
87.4957	1.22981	0.423941	2.90091	0.00372085	0.056002	68169	Ndnf
206.786	1.22614	0.449271	2.72917	0.0063493	0.0833267	17751	Mt3
38.4353	1.22322	0.311461	3.92737	8.58792e-05	0.00302423	107885	Mthfs
50.4799	1.22037	0.257362	4.74184	2.11785e-06	0.000123746	100039707	Mthfsl
359.537	1.21885	0.261027	4.66944	3.02019e-06	0.000171023	27999	Fam3c
424.902	1.21858	0.369309	3.29962	0.000968161	0.0203469	20541	Slc8a1
1018.12	1.21166	0.270231	4.48379	7.33302e-06	0.0003686	14199	Fhl1
35.9065	1.20232	0.426924	2.81623	0.00485914	0.0690942	107581	Col16a1
133.225	1.20062	0.399339	3.00651	0.00264268	0.0432904	57764	Ntn4
71.0391	1.18727	0.390654	3.03918	0.00237224	0.0401508	320127	Dgki
27.6705	1.18365	0.410697	2.88205	0.00395097	0.0588858	NA	Mina
208.104	1.18323	0.273682	4.32337	1.53666e-05	0.0006977	52589	Ncald
108.307	1.1832	0.458838	2.57868	0.00991776	0.113316	320827	C530008M17Rik
147.87	1.18275	0.376134	3.14448	0.00166381	0.0309279	68428	Steap3
57.4155	1.17932	0.350232	3.36726	0.000759181	0.0171358	73836	Slc35b2
73.81	1.17909	0.420134	2.80647	0.00500883	0.0704731	15572	Elavl4
5431.96	1.17822	0.200739	5.86942	4.37315e-09	5.49549e-07	13167	Dbi
944.055	1.16755	0.315086	3.7055	0.000210978	0.00623547	14182	Fgfr1
422.866	1.16722	0.449978	2.59396	0.00948785	0.109891	20979	Syt1
1090.78	1.16583	0.271286	4.29744	1.72784e-05	0.000767308	12361	Cask
677.746	1.16294	0.233275	4.98528	6.18709e-07	4.39979e-05	20238	Atxn1
184.24	1.15646	0.344256	3.35928	0.000781448	0.0174207	230815	Man1c1
186.141	1.14653	0.216228	5.30241	1.14287e-07	1.00808e-05	30785	Cttnbp2
45.7708	1.14507	0.425056	2.69392	0.00706163	0.0895987	212168	Zswim4
143.65	1.14074	0.334972	3.40547	0.000660501	0.0152815	22253	Unc5c
805.748	1.13519	0.208516	5.44415	5.2054e-08	5.0531e-06	19039	Lgals3bp
213.281	1.13189	0.23226	4.87338	1.09706e-06	7.21424e-05	NA	1190002N15Rik
167.416	1.12274	0.313679	3.57925	0.000344582	0.0091757	227753	Gsn
42.9307	1.11577	0.35158	3.1736	0.00150563	0.0286553	18612	Etv4
72.2668	1.10707	0.298127	3.71341	0.000204485	0.00608366	228875	Slc35c2
1866.65	1.10607	0.264958	4.1745	2.9864e-05	0.0012122	76257	Slc38a3
151.167	1.10371	0.223994	4.92743	8.33198e-07	5.70399e-05	235441	Usp3
182.093	1.10356	0.399591	2.76173	0.00574959	0.0781391	66240	Kcne1l
88.5598	1.09984	0.301551	3.64728	0.00026503	0.007574	13508	Dscam
142.425	1.09615	0.349495	3.13638	0.00171047	0.0315396	319865	E130114P18Rik
62.6835	1.09439	0.298797	3.66264	0.000249629	0.00720116	381110	Rmdn2
209.709	1.09222	0.33299	3.28003	0.00103796	0.021518	72043	Sulf2
247.805	1.08526	0.400572	2.70927	0.00674305	0.086944	99633	Adgrl2
128.791	1.08515	0.370731	2.92706	0.00342181	0.0523153	NA	2610100L16Rik
155.605	1.07396	0.183389	5.85617	4.73658e-09	5.87176e-07	19672	Rcn1
97.4133	1.06967	0.384462	2.78226	0.00539814	0.0743541	14810	Grin1
147.385	1.06297	0.292726	3.6313	0.000281997	0.00788689	66205	Cd302
267.462	1.05702	0.351346	3.00848	0.0026256	0.0431261	319660	Agmo
515.727	1.05595	0.396025	2.66636	0.0076678	0.0948789	17536	Meis2
65.3152	1.04726	0.383446	2.73119	0.0063106	0.082878	56191	Tro
137.651	1.04529	0.29867	3.49983	0.000465556	0.011691	15944	Irgm1
954.34	1.03967	0.282898	3.67506	0.000237795	0.00691414	140579	Elmo2
1055.19	1.03555	0.276265	3.74839	0.000177973	0.00546946	16816	Lcat
387.603	1.03485	0.400372	2.58473	0.00974552	0.111961	353211	Prune2
43.9607	1.0297	0.393509	2.61672	0.00887782	0.104578	12366	Casp2
658.136	1.02533	0.227967	4.49772	6.86868e-06	0.00035201	108682	Gpt2
455.221	1.02506	0.341205	3.00423	0.00266257	0.0433744	108089	Rnf144a
167.816	1.02419	0.299951	3.41453	0.000638915	0.0149709	83924	Gpr137b
189.281	1.0234	0.346325	2.95503	0.00312636	0.0490229	52552	Parp8
39.4716	1.01802	0.393402	2.58775	0.00966062	0.111194	13650	Rhbdf1
3527.7	1.01776	0.270178	3.76698	0.000165234	0.0051649	13618	Ednrb
368.302	1.01429	0.384205	2.63998	0.00829113	0.0994882	75625	Mageh1
124.73	1.00854	0.375952	2.68262	0.00730472	0.0917943	66256	Ssr2
372.661	1.00653	0.239205	4.20782	2.5785e-05	0.00108504	14924	Magi1
261.21	1.00486	0.287128	3.49969	0.000465803	0.011691	319156	Hist1h4d
71.0824	1.00469	0.383119	2.62239	0.00873162	0.103426	67062	Slc25a53
64.245	1.00109	0.38515	2.59923	0.0093433	0.108977	85029	Rpph1
189.285	0.997994	0.201927	4.94235	7.71853e-07	5.32375e-05	209773	Dennd2a
145.633	0.995287	0.23308	4.27015	1.95345e-05	0.000857414	56496	Tspan6
61.055	0.993825	0.362161	2.74415	0.00606675	0.0808722	17960	Nat1
50.4835	0.989499	0.319317	3.0988	0.00194307	0.034814	11853	Rhoc
44.7487	0.987541	0.318819	3.0975	0.00195162	0.034899	73652	2210408F21Rik
394.073	0.986595	0.301789	3.26915	0.0010787	0.0220953	26878	B3galt2
71.7432	0.981921	0.373022	2.63234	0.00847988	0.101154	108100	Baiap2
308.256	0.981202	0.323976	3.02863	0.00245666	0.0411995	14167	Fgf12
290.021	0.980613	0.256108	3.8289	0.000128716	0.00421706	20846	Stat1
2077.89	0.979009	0.231724	4.2249	2.3905e-05	0.0010176	14766	Adgrg1
9256.02	0.977187	0.28517	3.42669	0.000610995	0.0145018	232333	Slc6a1
77.7152	0.975248	0.347389	2.80736	0.00499487	0.0703846	83429	Ctns
80.039	0.974429	0.307177	3.17221	0.00151285	0.0287331	226144	Erlin1
122.289	0.964247	0.315274	3.05844	0.00222491	0.0384374	77300	Raph1
93.1434	0.963883	0.346603	2.78094	0.00542013	0.074601	71805	Nup93
489.458	0.960247	0.188937	5.08238	3.72744e-07	2.80276e-05	107351	Kank1
537.04	0.958532	0.300439	3.19044	0.00142058	0.027493	53860	2019-09-09
274.962	0.957515	0.259851	3.68486	0.000228824	0.0066851	56615	Mgst1
380.62	0.948384	0.196467	4.82719	1.38471e-06	8.72089e-05	75906	Fam184a
178.025	0.947873	0.29209	3.24515	0.0011739	0.0237199	320024	Nceh1
1902.26	0.946718	0.286102	3.30903	0.000936202	0.0198572	12558	Cdh2
109.781	0.941859	0.353599	2.66364	0.00773012	0.0950499	12286	Cacna1a
785.431	0.941808	0.187746	5.0164	5.26476e-07	3.78794e-05	72543	Mvb12b
39.484	0.941155	0.341509	2.75587	0.0058536	0.0790258	23939	Mapk7
75.5965	0.94105	0.298712	3.15036	0.00163071	0.0304361	72899	Macrod2
59.0821	0.941018	0.352418	2.67018	0.00758113	0.094299	67896	Ccdc80
927.358	0.940434	0.232256	4.04913	5.14074e-05	0.0019367	14009	Etv1
124.878	0.93883	0.251968	3.72599	0.000194553	0.00585157	18408	Slc25a15
157.563	0.938679	0.291803	3.21683	0.00129616	0.0254338	66797	Cntnap2
591.913	0.93822	0.266041	3.52659	0.000420942	0.0108469	381338	Lonrf2
3033.06	0.934908	0.166707	5.6081	2.04563e-08	2.14464e-06	14107	Fat1
57.2864	0.933288	0.353919	2.63701	0.00836408	0.100232	80285	Parp9
3164.31	0.932439	0.334934	2.78395	0.00537018	0.0740802	16011	Igfbp5
183.344	0.930184	0.322555	2.8838	0.00392903	0.0586541	75974	Dock11
1709.76	0.92842	0.173144	5.36211	8.22544e-08	7.66051e-06	NA	Pla2g16
369.398	0.91455	0.208545	4.38539	1.15779e-05	0.000544668	NA	Fam19a5
484.082	0.911221	0.237802	3.83185	0.000127182	0.00418174	268396	Sh3pxd2b
201.835	0.908089	0.315544	2.87785	0.00400394	0.0595302	57257	Vav3
225.575	0.90792	0.297724	3.04954	0.00229192	0.0393357	50780	Rgs3
86.7488	0.906712	0.258628	3.50585	0.000455148	0.0115659	12153	Bmp1
145.838	0.906035	0.323679	2.79918	0.00512323	0.0713712	12972	Cryz
166.16	0.901469	0.344521	2.61659	0.00888136	0.104578	17309	Mgat3
56.5731	0.900752	0.296	3.04308	0.00234171	0.0398546	20677	Sox4
410.265	0.889744	0.306212	2.90565	0.00366493	0.0552964	94212	Pag1
396.527	0.887486	0.291118	3.04854	0.00229957	0.0393933	70652	Tmem144
112.907	0.879405	0.273196	3.21895	0.0012866	0.0253004	245522	Zc4h2
191.396	0.875789	0.296108	2.95767	0.00309976	0.0487328	20440	St6gal1
184.219	0.874572	0.230974	3.78645	0.000152813	0.00485064	434128	Pnmal2
58.7961	0.873757	0.337765	2.58688	0.00968498	0.111335	100042165	BC005561
152.752	0.870408	0.288144	3.02074	0.00252159	0.0419434	67603	Dusp6
271.869	0.870006	0.276614	3.1452	0.00165976	0.0309153	140721	Caskin2
161.793	0.864909	0.295784	2.92412	0.00345432	0.0525954	664862	Gpr137b-ps
663.516	0.862648	0.252674	3.41407	0.000639998	0.0149771	104001	Rtn1
332.689	0.860766	0.324518	2.65245	0.00799111	0.0973526	229900	Gbp7
103.345	0.856804	0.236225	3.62706	0.000286663	0.0079688	66273	Aamdc
98.39	0.854978	0.318498	2.6844	0.00726591	0.0914946	225115	Svil
1203.92	0.851304	0.272413	3.12505	0.00177773	0.0323571	NA	Fam21
427.267	0.85048	0.209395	4.0616	4.87375e-05	0.00184749	16897	Llgl1
128.33	0.849829	0.256263	3.31624	0.000912373	0.0196011	18080	Nin
1064.71	0.848146	0.328912	2.57864	0.00991904	0.113316	56524	Mpp6
685.049	0.843842	0.312469	2.70056	0.00692222	0.0883185	71228	Dlg5
587.493	0.840506	0.272185	3.08799	0.00201515	0.0357217	18750	Prkca
210.992	0.836408	0.316337	2.64404	0.00819238	0.0990808	319478	Cxxc4
3671.48	0.834549	0.261825	3.18744	0.00143541	0.0276923	70097	Sash1
222.231	0.83249	0.310696	2.67944	0.00737456	0.0924188	20689	Sall3
276.361	0.828446	0.222215	3.72813	0.000192907	0.00582116	69399	1700025G04Rik
868.49	0.828007	0.227555	3.63871	0.000274011	0.00772239	19249	Ptpn13
104.766	0.825784	0.293834	2.81038	0.00494831	0.0698896	78781	Zc3hav1
249.228	0.821706	0.304059	2.70245	0.00688296	0.0880314	20397	Sgpl1
207.649	0.819355	0.307806	2.66192	0.00776953	0.0953034	242570	Raver2
429.374	0.813591	0.295807	2.75041	0.005952	0.0800596	224807	Tmem63b
347.998	0.813095	0.148291	5.4831	4.17932e-08	4.14476e-06	230673	Ipo13
328.746	0.811817	0.259382	3.12981	0.00174918	0.031995	16480	Jup
269.333	0.810506	0.291185	2.78348	0.00537799	0.0741322	12323	Camk2b
1019.02	0.807926	0.230547	3.50438	0.000457666	0.0116138	20917	Suclg2
87.2172	0.807523	0.265901	3.03693	0.00239003	0.0403402	72042	Cotl1
1210.27	0.807475	0.267411	3.0196	0.00253105	0.0420626	105501	Abhd4
117.677	0.806527	0.297707	2.70913	0.00674596	0.086944	83797	Smarcd1
1594.02	0.805214	0.211311	3.81056	0.00013865	0.00448643	106572	Rab31
73.2643	0.798983	0.268328	2.97764	0.0029048	0.0465046	52653	Nudcd2
1486.16	0.797315	0.218914	3.64213	0.000270392	0.0076482	19270	Ptprg
311.099	0.795947	0.206518	3.85412	0.000116147	0.00390999	18004	Nek1
1751.05	0.792897	0.217443	3.64647	0.00026587	0.00757605	224997	Dlgap1
62.9148	0.789814	0.235588	3.35253	0.000800772	0.0177866	NA	3110043O21Rik
49.7849	0.782652	0.301534	2.59557	0.00944347	0.109691	30963	Hacd1
239.724	0.780647	0.262503	2.97386	0.00294075	0.0468757	245578	Pcdh11x
452.382	0.777556	0.270641	2.87302	0.00406575	0.0601082	20681	Sox8
91.8506	0.775068	0.251852	3.07747	0.00208764	0.0367229	108037	Shmt2
762.894	0.768505	0.163735	4.6936	2.68444e-06	0.000153431	20516	Slc20a2
202.976	0.765742	0.278773	2.74683	0.00601738	0.0805866	234797	6430548M08Rik
184.107	0.764547	0.295254	2.58946	0.00961268	0.110712	18634	Pex7
618.084	0.759332	0.175655	4.32287	1.54013e-05	0.0006977	78928	Pigt
96.6225	0.759327	0.287066	2.64513	0.00816602	0.0990118	319236	Trim12c
299.732	0.758689	0.222314	3.41269	0.00064326	0.014989	14972	H2-K1
216.777	0.755597	0.285298	2.64845	0.00808619	0.0981849	217843	Unc79
96.2439	0.755326	0.283759	2.66186	0.00777096	0.0953034	69186	Tmem256
511.648	0.754341	0.188322	4.00559	6.18641e-05	0.00227459	98363	Efhd1
738.538	0.753507	0.221002	3.4095	0.000650826	0.0151148	12043	Bcl2
3500.68	0.751923	0.267886	2.80688	0.0050024	0.0704367	12010	B2m
145.998	0.751557	0.237136	3.1693	0.00152804	0.0289918	22234	Ugcg
132.052	0.751458	0.212029	3.54413	0.000393907	0.0102077	228071	Sestd1
1175.09	-0.75657	0.231434	-3.26906	0.00107905	0.0220953	209378	Itih5
359.864	-0.759082	0.253341	-2.99628	0.00273294	0.0443335	18519	Kat2b
63.6939	-0.760082	0.288319	-2.63625	0.00838283	0.100326	108011	Ap4e1
178.764	-0.761789	0.257049	-2.96359	0.00304073	0.0479393	237422	Ric8b
104.129	-0.765703	0.283774	-2.69829	0.00696976	0.0887985	69456	Commd10
695.354	-0.767642	0.252445	-3.04083	0.0023593	0.0400056	18616	Peg3
188.493	-0.771091	0.278934	-2.76442	0.00570234	0.0776119	227707	BC005624
180.294	-0.771695	0.207678	-3.71582	0.000202545	0.00605227	107702	Rnh1
1449.16	-0.773043	0.275647	-2.80446	0.00504002	0.0705872	56448	Cyp2d22
1121.6	-0.773403	0.19967	-3.87341	0.000107323	0.00366676	209456	Trp53bp2
494.228	-0.77448	0.243467	-3.18105	0.00146743	0.0281327	50772	Mapk6
4427.01	-0.776107	0.295747	-2.62423	0.00868457	0.103112	27276	Plekhb1
74.6462	-0.781349	0.270078	-2.89305	0.00381523	0.0571879	237411	Zfp938
593.882	-0.785988	0.18766	-4.18837	2.8097e-05	0.00116102	17762	Mapt
1451.6	-0.791265	0.256234	-3.08806	0.00201469	0.0357217	54208	Arl6ip1
130.986	-0.796796	0.305253	-2.61028	0.00904679	0.106126	75416	Nop14
141.501	-0.797097	0.265189	-3.00577	0.00264913	0.0433471	54650	Sfmbt1
516.013	-0.798716	0.239444	-3.33571	0.000850806	0.0186496	23936	Lynx1
998.099	-0.800243	0.278927	-2.86901	0.00411764	0.0607774	14137	Fdft1
825.594	-0.802572	0.192752	-4.16376	3.13049e-05	0.00125131	16001	Igf1r
167.225	-0.802712	0.258475	-3.10557	0.00189911	0.0342268	67050	Nkap
225.209	-0.802913	0.262423	-3.05961	0.00221623	0.0383234	26400	Map2k7
64.19	-0.804346	0.305676	-2.63137	0.00850413	0.101315	102954	Nudt10
42.3261	-0.804927	0.294242	-2.7356	0.00622669	0.0821287	67553	Gstcd
1129.02	-0.805227	0.286356	-2.81198	0.0049238	0.0695971	234663	Dync1li2
167.443	-0.813066	0.196553	-4.13663	3.52438e-05	0.00138759	212163	8030462N17Rik
359.024	-0.814817	0.311513	-2.61567	0.00890516	0.104733	76179	Usp31
239.936	-0.817077	0.255987	-3.19187	0.00141354	0.0274146	17904	Myl6
197.114	-0.817882	0.311887	-2.62237	0.00873209	0.103426	213326	Scyl2
80.7318	-0.818749	0.264211	-3.09884	0.00194278	0.034814	353258	Ltv1
216.628	-0.823053	0.253999	-3.24038	0.00119369	0.0239613	228607	Mavs
46.9928	-0.824316	0.29448	-2.79923	0.00512246	0.0713712	70472	Atad2
341.12	-0.825868	0.246488	-3.35054	0.000806548	0.0178933	60525	Acss2
2745.02	-0.826633	0.257102	-3.2152	0.00130356	0.0255516	16410	Itgav
91.1352	-0.827902	0.269649	-3.0703	0.00213844	0.0374727	114565	Zbtb21
66.2144	-0.830745	0.29503	-2.8158	0.00486563	0.0690942	75812	Tasp1
1093.95	-0.83161	0.24546	-3.38797	0.000704124	0.0161482	319554	Idi1
125.969	-0.83751	0.289817	-2.88979	0.00385503	0.0576902	107371	Exoc6
319.979	-0.837939	0.17111	-4.89709	9.72679e-07	6.5369e-05	81003	Trim23
167.708	-0.838179	0.281261	-2.98008	0.00288176	0.0463369	99480	Dnttip2
89.1122	-0.841518	0.250684	-3.35688	0.000788263	0.0175513	67260	Cers4
138.775	-0.843835	0.272392	-3.09787	0.00194917	0.0348892	16835	Ldlr
750.847	-0.844125	0.189594	-4.45229	8.49606e-06	0.000419025	57342	Parva
109.864	-0.849625	0.236121	-3.59826	0.000320356	0.00869464	23997	Psmd13
91.549	-0.851156	0.269585	-3.15728	0.0015925	0.0298138	67608	Narf
248.27	-0.85433	0.221712	-3.85333	0.00011652	0.00391538	226970	Arhgef4
108.607	-0.858848	0.24936	-3.44421	0.000572737	0.0137539	100416706	Zfp729b
234.263	-0.859458	0.277095	-3.10167	0.00192431	0.0345646	268451	Rab11fip4
717.803	-0.860172	0.293382	-2.93192	0.00336872	0.0516345	226251	Ablim1
156.103	-0.861727	0.274516	-3.13908	0.00169479	0.0313767	16558	Kif16b
642.217	-0.861809	0.275096	-3.13275	0.00173175	0.0317952	229603	Otud7b
219.794	-0.870373	0.309166	-2.81523	0.00487429	0.0691637	11907	Ate1
374.452	-0.876555	0.243001	-3.60721	0.000309507	0.00848074	319880	Tmcc3
58.3455	-0.879527	0.288883	-3.04458	0.00233006	0.0397671	210544	Tbc1d31
125.511	-0.881202	0.329312	-2.67589	0.00745312	0.0932123	22772	Zic2
859.532	-0.883303	0.285879	-3.08978	0.00200308	0.0355764	72349	Dusp3
99.678	-0.89689	0.242325	-3.70119	0.000214594	0.00630954	71890	Mad2l2
181.029	-0.901397	0.271123	-3.32468	0.000885213	0.0192429	20148	Dhrs3
1958.09	-0.901898	0.321488	-2.80539	0.00502565	0.0705152	53412	Ppp1r3c
51.5197	-0.901906	0.304299	-2.96388	0.00303787	0.0479393	69071	Tmem97
570.537	-0.902521	0.253598	-3.55887	0.000372458	0.00979009	17246	Mdm2
1739.98	-0.903253	0.296114	-3.05036	0.00228566	0.039301	56431	Dstn
1159.62	-0.903795	0.244105	-3.70248	0.000213505	0.00628761	12799	Cnp
117.041	-0.904337	0.230667	-3.92053	8.83532e-05	0.00309354	65099	Irak1bp1
178.613	-0.905673	0.224962	-4.02589	5.67596e-05	0.0021166	14735	Gpc4
44.4097	-0.906355	0.335099	-2.70473	0.0068359	0.0876007	83675	Bicc1
183.308	-0.909003	0.291422	-3.11919	0.00181347	0.0329749	73137	Prrc1
165.942	-0.913392	0.260135	-3.51122	0.000446053	0.0113663	53312	Nub1
1079.95	-0.917486	0.340825	-2.69196	0.00710338	0.0899418	20525	Slc2a1
53.0701	-0.923413	0.330238	-2.79621	0.00517062	0.0718133	101240	Wdr91
51.1277	-0.924542	0.357758	-2.58426	0.00975868	0.112042	406218	Panx2
164.382	-0.926068	0.306277	-3.02363	0.00249765	0.041713	67472	Mtfr1
128.576	-0.931099	0.302405	-3.07898	0.0020771	0.0366076	14085	Fah
200.297	-0.934171	0.316366	-2.95281	0.00314894	0.0492247	75965	Zdhhc20
67.9068	-0.934324	0.356165	-2.62329	0.0087086	0.103282	66274	Lyrm9
225.957	-0.939586	0.250982	-3.74364	0.000181372	0.00554604	66540	Fam107b
108.907	-0.946375	0.329229	-2.87452	0.00404645	0.0599679	59009	Sh3rf1
147.646	-0.948209	0.269013	-3.52477	0.000423855	0.0108914	75788	Smurf1
217.89	-0.960123	0.273296	-3.51313	0.000442865	0.0113323	77938	Fam53b
331.112	-0.960656	0.287172	-3.34523	0.000822139	0.0181295	77113	Klhl2
465.235	-0.961232	0.313726	-3.06392	0.00218458	0.0379473	NA	Fam73a
388.086	-0.969611	0.217338	-4.46131	8.14599e-06	0.000402842	320508	Cachd1
496.193	-0.970827	0.318985	-3.04349	0.0023385	0.0398371	74480	Samd4
114.324	-0.972698	0.341796	-2.84584	0.0044294	0.0643948	69955	Fars2
145.416	-0.976909	0.356733	-2.73849	0.00617225	0.0817671	19126	Prom1
615.053	-0.978248	0.247285	-3.95595	7.62313e-05	0.00273702	17968	Ncam2
51.8288	-0.982001	0.336106	-2.9217	0.00348126	0.0529407	319615	Zfp944
510.362	-0.987547	0.366937	-2.69133	0.00711679	0.0900442	19659	Rbp1
36.7721	-0.988655	0.37173	-2.6596	0.00782326	0.0958806	109778	Blvra
57.9651	-0.994016	0.291953	-3.40472	0.000662328	0.0153045	22758	Zscan12
99.2983	-0.996574	0.357426	-2.78819	0.00530027	0.0733363	74895	Ccdc181
36.844	-1.00656	0.367668	-2.7377	0.006187	0.0818112	NA	Fam175a
434.225	-1.00674	0.296788	-3.39212	0.000693546	0.0159455	56752	Aldh9a1
133.234	-1.01104	0.290196	-3.48398	0.000494021	0.0122319	12048	Bcl2l1
107.521	-1.01306	0.309775	-3.27032	0.00107425	0.0220461	21985	Tpd52
47.1739	-1.01726	0.310947	-3.27148	0.00106985	0.0220051	75578	Fggy
468.508	-1.02192	0.285607	-3.57806	0.000346157	0.00920427	22330	Vcl
421.872	-1.02225	0.323488	-3.16009	0.00157718	0.0295898	18600	Padi2
177.59	-1.02357	0.387049	-2.64456	0.00817975	0.0990118	107029	Me2
110.058	-1.0271	0.296173	-3.46791	0.000524517	0.0128654	52184	Odf2l
241.453	-1.02807	0.289634	-3.54953	0.000385921	0.0100528	105439	Slain1
245.985	-1.02837	0.367091	-2.8014	0.00508813	0.0710441	66948	Acad8
106.307	-1.03604	0.394182	-2.62834	0.00858031	0.102024	58233	Dnaja4
103.955	-1.03661	0.335355	-3.09109	0.00199424	0.0355227	74769	Pik3cb
80.2665	-1.04011	0.338813	-3.06985	0.00214163	0.0374929	73666	Thoc3
496.05	-1.04553	0.239803	-4.35994	1.301e-05	0.000599737	56298	Atl2
108.263	-1.04605	0.30979	-3.37663	0.00073379	0.0166812	30945	Rnf19a
130.199	-1.04797	0.369489	-2.83628	0.00456427	0.0661982	14911	Thumpd3
80.7549	-1.04803	0.350609	-2.98917	0.00279738	0.04518	20322	Sord
133.294	-1.05062	0.397852	-2.64073	0.00827272	0.0994241	232288	Frmd4b
170.381	-1.05109	0.317376	-3.31183	0.000926887	0.0198432	NA	Ppapdc2
44.077	-1.05521	0.378616	-2.78701	0.00531963	0.0734934	69656	Pir
87.8726	-1.05579	0.307412	-3.43443	0.000593793	0.0141118	233405	Vps33b
462.679	-1.05888	0.313233	-3.38048	0.000723583	0.0164914	108737	Oxsr1
123.799	-1.05937	0.311064	-3.40563	0.000660113	0.0152815	22275	Urod
163.268	-1.06138	0.319222	-3.3249	0.000884489	0.0192429	27008	Micall1
72.2383	-1.06163	0.283037	-3.75086	0.000176232	0.00543418	78267	Klhdc8b
103.881	-1.0656	0.406785	-2.61956	0.00880429	0.10408	230157	Tmeff1
140.409	-1.06843	0.307392	-3.4758	0.000509332	0.0125601	103080	2019-09-10
7899.06	-1.07465	0.407572	-2.63671	0.00837137	0.100254	20255	Scg3
32.0107	-1.08119	0.400214	-2.70154	0.00690191	0.0881206	29859	Sult4a1
130.649	-1.08995	0.33938	-3.2116	0.00132	0.0258188	209131	Snx30
60.3659	-1.1023	0.421071	-2.61785	0.00884846	0.104412	76787	Ppfia3
350.517	-1.10557	0.368974	-2.99634	0.00273244	0.0443335	76886	Fam81a
55.9739	-1.11267	0.413462	-2.69112	0.00712128	0.0900442	67911	Zfp169
224.996	-1.11425	0.378076	-2.94716	0.00320712	0.0498168	16554	Kif13b
94.0905	-1.11889	0.406337	-2.75359	0.00589448	0.0794064	378431	Txlnb
1169.67	-1.12037	0.265781	-4.21538	2.49355e-05	0.00105413	21858	Timp2
594.029	-1.12138	0.299462	-3.74465	0.000180645	0.00554045	110391	Qdpr
649.053	-1.1246	0.366431	-3.06908	0.00214721	0.037519	NA	9430020K01Rik
134.504	-1.12925	0.414959	-2.72136	0.0065014	0.0848373	234725	Zfp612
87.6889	-1.13113	0.341076	-3.31635	0.000912024	0.0196011	55992	Trim3
152.494	-1.13428	0.425727	-2.66433	0.00771419	0.0950499	13032	Ctsc
212.199	-1.13465	0.364882	-3.10963	0.00187319	0.0338563	56808	Cacna2d2
673.456	-1.14481	0.306241	-3.73826	0.000185296	0.00563785	235380	Dmxl2
849.806	-1.1488	0.424554	-2.7059	0.00681188	0.0875193	269116	Nfasc
165.945	-1.14976	0.38939	-2.95273	0.00314982	0.0492247	73442	Hspa12a
54.8387	-1.15429	0.43302	-2.66568	0.00768336	0.0948789	56332	Amotl2
219.588	-1.15944	0.343963	-3.37083	0.000749412	0.0169956	70152	Mettl7a1
772.329	-1.16587	0.230163	-5.06539	4.07556e-07	3.0273e-05	109731	Maob
197.892	-1.17132	0.288901	-4.05439	5.0266e-05	0.00190151	14366	Fzd4
1094.77	-1.17144	0.245909	-4.76369	1.90084e-06	0.000113599	18718	Pip4k2a
162.968	-1.17221	0.323796	-3.6202	0.00029438	0.0081218	381260	Gm973
292.342	-1.17235	0.445903	-2.62917	0.0085594	0.101907	382236	Brwd3
122.404	-1.17345	0.451139	-2.60109	0.00929287	0.108527	320705	Bend6
92.6759	-1.17399	0.412488	-2.84612	0.00442548	0.0643889	384783	Irs2
61.9773	-1.17632	0.375518	-3.13254	0.00173299	0.0317952	170459	Stard4
749.729	-1.17899	0.332795	-3.54269	0.000396064	0.0102491	52840	Dbndd2
430.273	-1.17953	0.43776	-2.69446	0.00705024	0.0895781	77446	Heg1
75.0691	-1.18595	0.394033	-3.00977	0.00261447	0.0429817	68034	Fam122a
858.397	-1.18849	0.350169	-3.39404	0.000688707	0.0158541	70892	Ttll7
123.031	-1.18868	0.388024	-3.06341	0.00218827	0.0379473	194590	Reps2
186.999	-1.18947	0.34732	-3.42472	0.000615444	0.0145697	70974	Pgm2l1
90.9973	-1.19124	0.373536	-3.1891	0.00142716	0.0275622	18590	Pdgfa
1378.01	-1.20316	0.300453	-4.00448	6.21537e-05	0.0022795	319387	Adgrl3
2145.2	-1.20375	0.368524	-3.26642	0.00108917	0.0222528	227937	Pkp4
763.233	-1.20828	0.215016	-5.61947	1.9154e-08	2.03132e-06	70757	Hacd2
803.292	-1.21031	0.235029	-5.14962	2.61013e-07	2.09118e-05	22329	Vcam1
59.5146	-1.21406	0.381316	-3.18387	0.00145322	0.0279186	20361	Sema7a
173.635	-1.21533	0.459571	-2.6445	0.00818128	0.0990118	333639	Mamld1
229.89	-1.22175	0.309542	-3.94698	7.91448e-05	0.0028349	18143	Npas2
120.453	-1.23986	0.256222	-4.83901	1.30488e-06	8.28842e-05	11761	Aox1
62.2917	-1.24164	0.442552	-2.80564	0.00502167	0.0705152	654795	Sdr39u1
145.065	-1.2417	0.315712	-3.93301	8.38882e-05	0.00298099	74682	Wdr35
66.2306	-1.24904	0.421403	-2.96399	0.00303679	0.0479393	14595	B4galt1
90.0951	-1.2497	0.349597	-3.57469	0.00035064	0.00929651	18187	Nrp2
44.0608	-1.25344	0.426242	-2.94069	0.00327484	0.0506179	20194	S100a10
160.261	-1.25681	0.209976	-5.9855	2.1572e-09	2.93172e-07	231570	A830010M20Rik
381.563	-1.26735	0.22512	-5.62967	1.80552e-08	1.93456e-06	66725	Lrrk2
25.6345	-1.26957	0.450524	-2.81798	0.00483273	0.0690008	624866	Lekr1
98.9805	-1.27097	0.429378	-2.96004	0.00307603	0.0484013	328232	Gfod1
135.432	-1.27351	0.432829	-2.94229	0.00325791	0.0504412	380702	Shisa6
67.2415	-1.27435	0.460079	-2.76985	0.00560829	0.0767875	235320	Zbtb16
270.681	-1.27867	0.276438	-4.62554	3.73616e-06	0.000205848	269951	Idh2
63.6133	-1.28101	0.395896	-3.23571	0.00121339	0.0242243	57278	Bcam
126.125	-1.28286	0.354496	-3.61882	0.000295947	0.00815277	52013	R3hcc1l
27.5731	-1.29092	0.458178	-2.8175	0.00483991	0.0690412	385658	Nxpe3
192.538	-1.29107	0.425369	-3.03518	0.00240394	0.0404408	319984	Jph4
48.378	-1.29863	0.467549	-2.77753	0.00547745	0.075277	75564	Rsph9
960.52	-1.30674	0.363811	-3.59181	0.000328389	0.00886024	320365	Fry
93.3757	-1.31175	0.432196	-3.03507	0.0024048	0.0404408	217944	Rapgef5
47.4684	-1.31412	0.506272	-2.59568	0.00944035	0.109691	226180	Ina
117.418	-1.31486	0.48081	-2.73468	0.00624402	0.082239	14081	Acsl1
402.349	-1.31546	0.397459	-3.30967	0.000934062	0.0198572	320244	Ttll5
46.7551	-1.32667	0.471695	-2.81255	0.00491501	0.0695263	225049	Ttc7
2692.51	-1.32829	0.395738	-3.35648	0.000789409	0.0175555	54393	Gabbr1
111.379	-1.33075	0.403761	-3.29588	0.000981134	0.0205255	16494	Kcna6
56.6378	-1.33226	0.504646	-2.63999	0.00829074	0.0994882	245240	9930111J21Rik2
102.869	-1.33658	0.490865	-2.72291	0.00647093	0.0845928	21976	Top3b
81.3828	-1.33781	0.402363	-3.32489	0.000884541	0.0192429	60527	Fads3
123.444	-1.33861	0.469016	-2.85408	0.00431615	0.0631991	16581	Kifc2
84.5127	-1.34859	0.369839	-3.64641	0.000265928	0.00757605	22320	Vamp8
185.966	-1.35	0.351313	-3.84272	0.000121678	0.00404426	20745	Spock1
86.0337	-1.35388	0.393477	-3.4408	0.000580003	0.0138379	214048	Larp1b
1106.43	-1.35717	0.391883	-3.4632	0.000533801	0.0130235	215789	Phactr2
897.942	-1.36122	0.368004	-3.69893	0.000216508	0.00635562	18751	Prkcb
40.3803	-1.36269	0.455876	-2.98916	0.00279743	0.04518	209966	Pgbd5
29.8444	-1.36599	0.432982	-3.15485	0.00160579	0.0300321	432769	Zfp708
160.446	-1.36973	0.5198	-2.6351	0.00841121	0.100485	72902	Spock3
121.575	-1.37175	0.514281	-2.66732	0.00764579	0.0947819	210274	Shank2
64.7318	-1.37267	0.342042	-4.01317	5.99088e-05	0.0022205	26427	Creb3l1
47.1984	-1.37413	0.507775	-2.70618	0.00680625	0.0875082	76282	Gpt
91.2143	-1.37446	0.470909	-2.91874	0.00351447	0.0533333	72925	2019-03-01
300.86	-1.37889	0.349385	-3.94661	7.92667e-05	0.0028349	14763	Gpr37
42.4657	-1.38456	0.42603	-3.2499	0.00115446	0.0234302	69113	Alkbh3
81.6206	-1.39069	0.429939	-3.23461	0.00121809	0.0242652	330064	Slc5a6
190.614	-1.39109	0.508665	-2.73479	0.00624208	0.082239	208618	Etl4
878.032	-1.40042	0.425409	-3.29195	0.000994969	0.020744	73710	Tubb2b
187.258	-1.40051	0.500433	-2.79859	0.00513261	0.0714476	67731	Fbxo32
198.81	-1.40284	0.383741	-3.65569	0.000256487	0.00737581	70611	Fbxo33
27.5637	-1.40284	0.483137	-2.90362	0.0036888	0.0555652	231821	Adap1
48.6125	-1.40633	0.508247	-2.76701	0.00565723	0.0772271	77862	Thyn1
104.356	-1.40979	0.393019	-3.58709	0.000334391	0.00900892	243219	2900026A02Rik
96.4683	-1.41045	0.450553	-3.13049	0.00174515	0.0319544	223658	Mroh1
81.3511	-1.41528	0.491687	-2.87842	0.00399674	0.0594713	15245	Hhip
100.348	-1.41726	0.459221	-3.08623	0.00202714	0.035865	50918	Myadm
195.842	-1.42	0.375477	-3.78185	0.000155665	0.00493261	21838	Thy1
717.019	-1.42142	0.250428	-5.67595	1.37922e-08	1.52082e-06	22042	Tfrc
24.7246	-1.42891	0.448662	-3.18483	0.0014484	0.0278552	68463	Mrpl14
432.048	-1.43596	0.271803	-5.28308	1.27028e-07	1.09933e-05	52502	Carhsp1
112.927	-1.43652	0.358238	-4.00997	6.0726e-05	0.00224173	546336	Prrg1
13332.4	-1.43756	0.324758	-4.42655	9.57522e-06	0.000463527	14319	Fth1
467.705	-1.44038	0.511264	-2.81729	0.00484308	0.0690412	101351	Eogt
24.3385	-1.44764	0.457275	-3.16579	0.00154663	0.0292806	666468	Atg4a
93.0052	-1.4494	0.440358	-3.29141	0.000996882	0.0207603	26365	Ceacam1
69.7644	-1.45889	0.413871	-3.525	0.000423485	0.0108914	121022	Mrps6
91.0869	-1.46006	0.415726	-3.51206	0.000444651	0.0113494	77864	Ypel2
64.6799	-1.46405	0.451312	-3.24399	0.00117868	0.0237901	231148	Ablim2
34.4159	-1.46548	0.486486	-3.01238	0.00259207	0.0427709	110637	Grik4
630.411	-1.47911	0.487258	-3.03558	0.00240073	0.0404408	22041	Trf
174.636	-1.48082	0.456943	-3.2407	0.00119236	0.0239613	17342	Mitf
73.054	-1.48264	0.452016	-3.28006	0.00103787	0.021518	271813	Agbl2
167.707	-1.49507	0.299331	-4.99471	5.89245e-07	4.20657e-05	105352	Dusp22
99.8291	-1.49771	0.454302	-3.29674	0.000978154	0.0204865	242481	Palm2
72.8777	-1.49806	0.429338	-3.48922	0.000484425	0.0120594	16498	Kcnab2
87.9786	-1.50364	0.548351	-2.74211	0.00610466	0.0812198	328479	Gm5089
43.5267	-1.50881	0.554981	-2.71866	0.00655467	0.0853913	72569	Bbs5
245.049	-1.50904	0.325254	-4.63957	3.49131e-06	0.00019352	56013	Srcin1
87.3711	-1.51264	0.338741	-4.46547	7.98939e-06	0.000396166	18762	Prkcz
238.891	-1.51702	0.516549	-2.93683	0.00331581	0.0509935	16543	Mdfic
35.8969	-1.51875	0.587043	-2.58713	0.00967804	0.111325	104886	Rab15
13.0036	-1.5192	0.564916	-2.68925	0.00716127	0.0904253	69120	1810021B22Rik
119.438	-1.52483	0.501186	-3.04244	0.00234666	0.039902	14260	Fmn1
455.953	-1.52991	0.329536	-4.64261	3.4404e-06	0.000192442	13731	Emp2
17.8409	-1.53271	0.565318	-2.71123	0.00670349	0.0867953	19273	Ptpru
231.515	-1.53281	0.484985	-3.16054	0.00157476	0.0295898	70380	Mospd1
237.045	-1.54349	0.413545	-3.73234	0.000189712	0.00574364	320478	Sox2ot
32.0698	-1.54401	0.426159	-3.6231	0.000291098	0.00806764	17864	Mybl1
74.6116	-1.55861	0.438168	-3.55711	0.000374953	0.00984157	103743	Tmem98
92.3298	-1.5602	0.557799	-2.79707	0.0051568	0.0716756	54141	Spag5
218.075	-1.56199	0.306358	-5.09857	3.42223e-07	2.61074e-05	12386	Ctnna2
602.655	-1.56685	0.434834	-3.60333	0.000314169	0.00856473	110639	Prps2
522.337	-1.56792	0.474488	-3.30445	0.000951625	0.0200684	387314	Tmtc1
16.3298	-1.57252	0.521907	-3.01302	0.00258659	0.0427533	11443	Chrnb1
657.462	-1.5728	0.47641	-3.30136	0.000962171	0.0202442	20529	Slc31a1
360.084	-1.57378	0.358794	-4.38631	1.15292e-05	0.000543769	18952	2019-09-04
421.869	-1.57745	0.476028	-3.31378	0.000920437	0.0197281	54366	Ctnnal1
26.3892	-1.58599	0.526015	-3.01511	0.00256885	0.0425368	433374	Gm20743
250.621	-1.58747	0.517719	-3.06627	0.00216749	0.0377653	330319	Wipf3
414.653	-1.59033	0.478979	-3.32025	0.000899361	0.0194582	118446	Gjc3
1386.95	-1.59112	0.260637	-6.10475	1.02963e-09	1.54842e-07	18795	Plcb1
15.9884	-1.59158	0.588061	-2.70649	0.00679995	0.0875082	75099	Lysmd4
148.513	-1.59533	0.380026	-4.19795	2.69337e-05	0.00111799	13849	Ephx1
75.0235	-1.59729	0.43996	-3.63053	0.000282841	0.00789845	329152	Hecw2
31.4194	-1.60872	0.532072	-3.02351	0.00249864	0.041713	NA	Mettl20
146.308	-1.61286	0.387234	-4.16508	3.11248e-05	0.00124683	68235	Mturn
186.512	-1.61891	0.47268	-3.42496	0.000614897	0.0145697	21367	Cntn2
23.3975	-1.62061	0.592813	-2.73376	0.00626164	0.0822939	667214	9930111J21Rik1
38.916	-1.62765	0.586066	-2.77724	0.00548222	0.0752861	114332	Lyve1
1033.17	-1.63008	0.388134	-4.19979	2.67157e-05	0.00111398	72584	Cul4b
20.4312	-1.63088	0.593783	-2.74659	0.00602192	0.0805866	67417	Ears2
56.057	-1.63267	0.563229	-2.89877	0.00374631	0.0562467	NA	3110035E14Rik
32.1685	-1.63827	0.580881	-2.82031	0.00479766	0.0686604	114479	Slc5a5
2439.66	-1.64424	0.383099	-4.29194	1.77116e-05	0.000779266	56508	Rapgef4
55.6717	-1.64466	0.563943	-2.91635	0.00354153	0.0536995	228564	Frmd5
860.606	-1.64486	0.383062	-4.29399	1.7549e-05	0.000773969	20496	Slc12a2
273.746	-1.65724	0.40032	-4.1398	3.47603e-05	0.00137359	226856	Lpgat1
92.8406	-1.66671	0.417707	-3.99015	6.60319e-05	0.00240374	20975	Synj2
48.9764	-1.66735	0.588447	-2.83348	0.00460448	0.0665709	69480	Ttc9
58.0708	-1.67168	0.538372	-3.10507	0.00190237	0.0342519	NA	Fam69a
586.008	-1.67225	0.387318	-4.31752	1.57793e-05	0.000711307	20502	Slc16a2
19.8723	-1.67678	0.594314	-2.82138	0.00478179	0.0685403	72630	Hspa12b
162.548	-1.67915	0.525109	-3.19772	0.00138517	0.0269499	433904	Ociad2
63.4277	-1.68905	0.44825	-3.7681	0.000164498	0.0051649	246154	Vasn
201.849	-1.69127	0.256474	-6.59431	4.27252e-11	8.87165e-09	68201	Ccdc34
122.396	-1.6956	0.488869	-3.46841	0.000523557	0.012859	67801	Pllp
71.3138	-1.69584	0.357621	-4.742	2.11623e-06	0.000123746	59092	Pcbp4
86.145	-1.70345	0.510949	-3.33389	0.000856413	0.0187501	226162	Dpcd
23.842	-1.70575	0.618313	-2.75872	0.0058028	0.0786896	75051	Ccdc173
1016.92	-1.71236	0.279908	-6.11757	9.50117e-10	1.44064e-07	16438	Itpr1
15.2547	-1.7126	0.664292	-2.57808	0.00993506	0.113428	381201	Ap5b1
31.7058	-1.7297	0.423564	-4.08368	4.43288e-05	0.00170146	66061	Tctex1d2
47.437	-1.73076	0.556628	-3.10937	0.00187486	0.0338563	20911	Stxbp2
72.6712	-1.73182	0.412204	-4.20136	2.65319e-05	0.00110884	213469	Lgi3
609.927	-1.73463	0.487732	-3.55653	0.000375785	0.00984933	20377	Sfrp1
70.9503	-1.73842	0.525011	-3.3112	0.000928956	0.0198572	67978	Tctn2
140.996	-1.73875	0.283399	-6.13535	8.49737e-10	1.3212e-07	110333	Rmst
23.8893	-1.74028	0.555185	-3.1346	0.00172086	0.0316359	19885	Rorc
827.78	-1.74617	0.376207	-4.64152	3.45854e-06	0.000192869	17153	Mal
24.7245	-1.74691	0.678087	-2.57624	0.00998809	0.113821	74257	Tspan17
20.5214	-1.75335	0.651791	-2.69004	0.00714434	0.0902736	71007	D7Ertd443e
62.6599	-1.75404	0.501637	-3.49664	0.000471153	0.0117769	53886	Cdkl2
23.9459	-1.7711	0.664746	-2.66433	0.00771413	0.0950499	56501	Elf4
48.1357	-1.79058	0.633111	-2.82823	0.00468064	0.0673007	13876	Erg
114.803	-1.79141	0.541102	-3.31068	0.000930708	0.0198572	381259	Tmem237
71.4848	-1.79161	0.596405	-3.00402	0.00266436	0.0433744	73750	Whrn
72.2304	-1.79413	0.564217	-3.17985	0.00147351	0.0282196	71877	Efhc1
49.0968	-1.7954	0.525796	-3.41463	0.000638697	0.0149709	69707	Iqcg
92.9132	-1.79609	0.488416	-3.67737	0.000235651	0.00686268	103466	Nt5dc3
43.4811	-1.80385	0.664968	-2.71269	0.00667387	0.0865339	19762	Rit2
306.65	-1.81214	0.280665	-6.4566	1.07082e-10	2.02539e-08	269643	Ppp2r2c
20.8875	-1.81597	0.600295	-3.02513	0.00248527	0.0415653	241324	Crb2
132.298	-1.81641	0.399842	-4.54281	5.55098e-06	0.000289329	225908	Myrf
158.38	-1.81897	0.390433	-4.65886	3.1797e-06	0.000179501	217882	Cep170b
35.9252	-1.8203	0.660158	-2.75737	0.00582679	0.0787798	110789	Adgrv1
31.5698	-1.8204	0.502512	-3.62261	0.000291646	0.00807064	11438	Chrna4
738.714	-1.83526	0.27031	-6.78944	1.12567e-11	2.68216e-09	14456	Gas6
65.5968	-1.83886	0.506078	-3.63355	0.000279544	0.0078422	237847	Rtn4rl1
68.8344	-1.84002	0.529435	-3.47544	0.000510017	0.0125601	67338	Rffl
85.4194	-1.84515	0.386749	-4.77091	1.83394e-06	0.000110682	17250	Abcc1
47.9335	-1.85254	0.498211	-3.71839	0.000200497	0.00601066	70727	Rasgef1a
70.4879	-1.85291	0.531483	-3.4863	0.000489753	0.012159	117149	Tirap
28.5077	-1.86486	0.610234	-3.05597	0.00224332	0.0386826	73010	Gpr22
123.279	-1.87351	0.605815	-3.09255	0.00198445	0.0353895	56219	Extl1
62.8889	-1.87452	0.702553	-2.66815	0.00762696	0.0946124	NA	Fam46a
111.805	-1.87679	0.504894	-3.7172	0.000201442	0.00602912	114301	Palmd
332.407	-1.88529	0.39364	-4.78937	1.67306e-06	0.000102319	108079	Prkaa2
56.3431	-1.89419	0.559585	-3.38499	0.000711799	0.0162834	16400	Itga3
891.789	-1.89971	0.321401	-5.91069	3.40671e-09	4.46449e-07	58807	Slco1c1
64.7563	-1.9115	0.649907	-2.94119	0.00326956	0.050579	21987	Tpd52l1
685.89	-1.91631	0.51212	-3.74192	0.00018262	0.00556567	242425	Gabbr2
403.598	-1.92163	0.594822	-3.23059	0.00123533	0.0245023	216049	Zfp365
155.218	-1.92964	0.579969	-3.32715	0.000877401	0.0191411	320092	E030003E18Rik
23.8947	-1.93185	0.720643	-2.68073	0.00734628	0.0921903	239157	Pnma2
203.536	-1.9389	0.400867	-4.83677	1.31966e-06	8.34892e-05	18584	Pde8a
153.448	-1.93986	0.619332	-3.13219	0.00173509	0.031802	116837	Rims1
35.0173	-1.94803	0.414721	-4.6972	2.63747e-06	0.000151218	97031	Tprn
122.59	-1.94828	0.428731	-4.54429	5.51198e-06	0.000288115	235402	Lingo1
141.781	-1.95132	0.516598	-3.77725	0.000158569	0.00500945	269823	Pon3
100.764	-1.95322	0.547779	-3.56571	0.000362867	0.00957917	68519	Eml1
41.9838	-1.96132	0.448087	-4.3771	1.2027e-05	0.000562907	234967	Slc36a4
8.61225	-1.96307	0.757397	-2.59186	0.00954587	0.110288	319634	Efcab5
21.0364	-1.96893	0.629264	-3.12894	0.00175435	0.0319951	75552	Paqr9
1332.46	-1.97132	0.319099	-6.17777	6.50149e-10	1.04634e-07	16574	Kif5c
33.1785	-1.9792	0.552584	-3.58172	0.000341337	0.00913805	29807	Tpk1
379.009	-1.98498	0.373289	-5.31756	1.05169e-07	9.50513e-06	101565	Ccp110
52.0429	-1.98693	0.5598	-3.54936	0.000386168	0.0100528	227933	Ccdc148
77.6166	-1.98806	0.638247	-3.11488	0.0018402	0.0333288	109711	Actn1
40.5162	-1.98857	0.562882	-3.53284	0.000411114	0.0106086	94226	S1pr5
96.7328	-1.98892	0.620525	-3.20521	0.00134963	0.0263142	319625	Galm
31.8728	-1.99003	0.744648	-2.67244	0.00753011	0.0938166	207839	Galnt6
35.7585	-1.99539	0.475291	-4.19825	2.68986e-05	0.00111799	12815	Col11a2
18.7445	-1.99857	0.715893	-2.79172	0.00524292	0.0726525	619331	Zfp551
17.6764	-2.00444	0.738671	-2.71358	0.0066561	0.0864257	210108	D130043K22Rik
13.5276	-2.0051	0.67936	-2.95145	0.00316281	0.0493016	620631	Ttc30a2
78.2806	-2.00786	0.480335	-4.18013	2.91342e-05	0.00119773	27428	Shroom3
303.192	-2.01464	0.523185	-3.85073	0.000117769	0.00394288	15452	Hprt
30.8921	-2.01716	0.611437	-3.29905	0.000970138	0.0203651	231991	Creb5
1901.01	-2.01811	0.737222	-2.73746	0.00619166	0.0818112	11668	Aldh1a1
141.353	-2.01949	0.440649	-4.583	4.58349e-06	0.000245887	231238	Sel1l3
29.3013	-2.02089	0.730229	-2.76747	0.00564937	0.0771772	75172	Ccdc146
123.158	-2.02834	0.720728	-2.81429	0.00488847	0.0692577	15444	Hpca
664.408	-2.02961	0.453358	-4.47684	7.57546e-06	0.000377682	58869	Pex5l
62.7516	-2.03291	0.504029	-4.03332	5.49943e-05	0.00205896	240913	Adamts4
42.6629	-2.04661	0.560108	-3.65396	0.00025823	0.00740272	213019	Pdlim2
118.921	-2.0596	0.588294	-3.50096	0.000463582	0.011691	18417	Cldn11
76.4001	-2.06566	0.464593	-4.44617	8.74159e-06	0.000428968	17136	Mag
27.069	-2.07026	0.528827	-3.91481	9.04744e-05	0.00316178	223775	Pim3
71.0735	-2.07624	0.656364	-3.16324	0.00156025	0.0294173	23876	Fbln5
70.4625	-2.07648	0.345986	-6.00163	1.95341e-09	2.67456e-07	233765	Plekha7
204.598	-2.07822	0.47026	-4.41931	9.90163e-06	0.000476812	330938	Dixdc1
521.581	-2.08691	0.554313	-3.76486	0.000166644	0.00519085	100042480	Nhsl2
40.1367	-2.08913	0.790657	-2.64227	0.00823525	0.0993458	26367	Ceacam2
837.501	-2.0924	0.453374	-4.61517	3.92764e-06	0.00021575	268301	Sowahc
21.1251	-2.09397	0.692762	-3.02263	0.00250585	0.0417724	107239	Carns1
12.3976	-2.10793	0.775422	-2.71843	0.00655927	0.0853913	18991	Pou3f1
75.6975	-2.1112	0.512087	-4.12272	3.74419e-05	0.0014647	66949	Trim59
53.8199	-2.12698	0.618146	-3.44091	0.00057977	0.0138379	105440	Kctd9
37.7173	-2.12955	0.716309	-2.97295	0.00294956	0.0469753	17001	Ltc4s
241.018	-2.13358	0.363597	-5.86799	4.41112e-09	5.50549e-07	13865	Nr2f1
445.376	-2.14292	0.476076	-4.50122	6.75658e-06	0.000347235	320587	Tmem88b
22.8522	-2.14521	0.620232	-3.45871	0.00054276	0.0132016	11554	Adrb1
861.689	-2.14886	0.466133	-4.60997	4.02721e-06	0.000220559	22153	Tubb4a
35.4724	-2.15125	0.833801	-2.58005	0.00987867	0.113066	21667	Tdgf1
69.2453	-2.15615	0.595011	-3.62371	0.00029041	0.00806075	16177	Il1r1
50.5669	-2.15773	0.47156	-4.57572	4.74585e-06	0.000253855	57340	Jph3
39.8755	-2.15777	0.517406	-4.17037	3.0411e-05	0.00122655	72315	Ccdc74a
90.0273	-2.15828	0.444837	-4.85184	1.22324e-06	7.93029e-05	17921	Myo7a
32.7035	-2.16522	0.549372	-3.94126	8.10553e-05	0.00289323	234683	Elmo3
98.9661	-2.16672	0.605305	-3.57955	0.000344183	0.0091757	242584	Wdr78
18.4763	-2.17515	0.78651	-2.76557	0.00568227	0.0774189	12810	Coch
1651.15	-2.17666	0.448	-4.85861	1.18215e-06	7.71847e-05	17433	Mobp
21.4063	-2.17949	0.740598	-2.94287	0.0032518	0.0503974	67586	Ubxn11
69.8309	-2.18204	0.486618	-4.48409	7.32274e-06	0.0003686	107449	Unc5b
175.698	-2.18316	0.551204	-3.96072	7.47255e-05	0.00269408	218294	Cdc14b
50.0251	-2.18383	0.707839	-3.0852	0.00203412	0.0359538	73873	Fam161a
94.0243	-2.18536	0.522635	-4.18143	2.89686e-05	0.00119435	245404	Dcaf12l1
808.011	-2.19206	0.399301	-5.48975	4.02495e-08	4.01336e-06	56839	Lgi1
68.596	-2.1946	0.582509	-3.76749	0.000164894	0.0051649	14118	Fbn1
57.4777	-2.19643	0.710639	-3.09078	0.00199631	0.0355249	81907	Tmem108
100.754	-2.20712	0.77527	-2.84691	0.00441465	0.0642822	218865	Chdh
31.5753	-2.21073	0.529032	-4.17883	2.93011e-05	0.00119997	80976	Syt13
595.452	-2.21554	0.445303	-4.97535	6.51284e-07	4.61356e-05	320111	Prr18
5774.67	-2.221	0.345057	-6.43661	1.22168e-10	2.28716e-08	16572	Kif5a
236.953	-2.22603	0.454672	-4.89589	9.78617e-07	6.55281e-05	71653	Shtn1
27.4304	-2.24686	0.715494	-3.1403	0.00168777	0.0312783	319982	5930430L01Rik
30.4034	-2.25715	0.759668	-2.97123	0.00296605	0.0471153	100038732	Gm11681
379.744	-2.25907	0.33329	-6.77808	1.21783e-11	2.86455e-09	76376	Slc24a2
22.9509	-2.26205	0.709982	-3.18607	0.00144217	0.0277937	226777	C130074G19Rik
66.9108	-2.27077	0.635077	-3.57558	0.000349456	0.00927852	60510	Syt9
2396.3	-2.27292	0.44583	-5.09818	3.42939e-07	2.61074e-05	76960	Bcas1
394.074	-2.27667	0.495889	-4.59109	4.40933e-06	0.000238637	22239	Ugt8a
30.8962	-2.28328	0.663085	-3.44343	0.000574393	0.0137577	18667	Pgr
23831	-2.2834	0.455467	-5.01331	5.35023e-07	3.8344e-05	17196	Mbp
94.3312	-2.28992	0.518918	-4.41288	1.02006e-05	0.000488643	17441	Mog
22.3972	-2.29107	0.730807	-3.13499	0.0017186	0.0316261	70005	Znf41-ps
21.3185	-2.29739	0.561335	-4.09272	4.26349e-05	0.00164333	246104	Rhbdl3
16.6309	-2.29992	0.73491	-3.12953	0.00175086	0.031995	242384	Lingo2
14.7329	-2.30438	0.758197	-3.03928	0.00237141	0.0401508	71093	Atoh8
683.696	-2.31538	0.503763	-4.59617	4.30332e-06	0.000234035	208898	Unc13c
119.934	-2.33306	0.528374	-4.41555	1.00754e-05	0.00048391	338521	Fa2h
41.2733	-2.33515	0.543453	-4.29688	1.7322e-05	0.000767308	NA	Lrrc48
28.7154	-2.33692	0.738909	-3.16267	0.00156331	0.0294175	NA	Fam46c
32.2991	-2.33946	0.899142	-2.60188	0.00927154	0.108347	226115	Opalin
13.0446	-2.33996	0.784921	-2.98113	0.00287184	0.0462596	78177	Ninl
51.7668	-2.34072	0.693275	-3.37631	0.000734638	0.0166812	68262	Agpat4
38.0104	-2.34186	0.834877	-2.80504	0.00503104	0.0705152	74090	Paqr5
34.8435	-2.34627	0.891324	-2.63235	0.00847969	0.101154	14461	Gata2
680.238	-2.35474	0.337185	-6.98351	2.87898e-12	7.65516e-10	72948	Tppp
163.771	-2.35906	0.444371	-5.30876	1.10373e-07	9.85953e-06	14017	Evi2a
79.8628	-2.36079	0.769513	-3.0679	0.00215567	0.0376309	18260	Ocln
43.7666	-2.38522	0.628302	-3.7963	0.000146874	0.00471582	12257	Tspo
19.3819	-2.39141	0.542166	-4.41085	1.02968e-05	0.000491965	18294	Ogg1
12.7841	-2.39266	0.796095	-3.0055	0.00265146	0.0433471	69297	Lrrc46
7.64517	-2.39322	0.848124	-2.82178	0.00477583	0.0685084	70426	Tekt5
80.6957	-2.39492	0.414789	-5.77383	7.74889e-09	9.05534e-07	381199	Tmem151a
12.2084	-2.40452	0.866484	-2.77504	0.00551953	0.0757419	76438	Rftn1
27.536	-2.42815	0.695325	-3.49212	0.000479211	0.011962	28105	Trim36
20.0445	-2.4343	0.761387	-3.19719	0.00138771	0.0269707	12716	Ckmt1
45.6722	-2.44049	0.724782	-3.36721	0.000759327	0.0171358	12700	Cish
20.137	-2.4409	0.793911	-3.07453	0.00210836	0.0370164	235472	Prtg
152.058	-2.44131	0.697573	-3.49972	0.000465749	0.011691	12585	Cdr2
186.41	-2.44541	0.362952	-6.73756	1.61073e-11	3.694e-09	243912	Hspb6
725.531	-2.45492	0.411858	-5.9606	2.51311e-09	3.35114e-07	70747	Tspan2
1193.91	-2.46134	0.297986	-8.25991	1.45777e-16	6.21994e-14	116847	Prelp
14.3779	-2.49263	0.880962	-2.82944	0.004663	0.0672051	208666	Diras1
302.321	-2.49622	0.445402	-5.60443	2.08936e-08	2.17804e-06	26950	Vsnl1
17.8857	-2.50336	0.938932	-2.66618	0.00767186	0.0948789	100039045	Gm10471
64.1154	-2.50451	0.456086	-5.49131	3.98974e-08	3.99999e-06	14051	Eya4
33.6738	-2.50588	0.695902	-3.6009	0.000317115	0.0086322	76469	Cmya5
41.2543	-2.50647	0.724717	-3.45854	0.000543107	0.0132016	100048534	Cfap43
11.6968	-2.51045	0.931791	-2.69422	0.00705535	0.089581	105988	Espl1
123.427	-2.51315	0.643608	-3.90477	9.43138e-05	0.00327723	237010	Klhl4
42.4431	-2.52414	0.776617	-3.25018	0.00115334	0.0234302	210622	Pamr1
16.5846	-2.52728	0.729208	-3.46579	0.000528671	0.0129327	384214	Ephx4
233.06	-2.53678	0.401188	-6.32317	2.5625e-10	4.52059e-08	97998	Deptor
42.7983	-2.54171	0.664952	-3.8224	0.000132159	0.00430677	69327	1700007K13Rik
64.8953	-2.55983	0.474097	-5.39938	6.68716e-08	6.39007e-06	241919	Slc7a14
9.50537	-2.56698	0.773987	-3.31657	0.000911299	0.0196011	75659	Wdr54
253.02	-2.58185	0.44607	-5.788	7.12288e-09	8.43454e-07	54156	Egfl6
311.611	-2.58657	0.590293	-4.38184	1.17681e-05	0.000552196	21814	Tgfbr3
17.3625	-2.59246	0.75121	-3.45104	0.000558424	0.0134808	12865	Cox7a1
16.259	-2.59314	0.891143	-2.9099	0.00361546	0.0546399	21401	Tcea3
105.524	-2.59734	0.574954	-4.51747	6.25817e-06	0.000324346	338372	Map3k9
218.273	-2.60063	0.627866	-4.14201	3.44272e-05	0.00136718	270190	Ephb1
134.888	-2.60748	0.59707	-4.36713	1.25891e-05	0.000582506	18761	Prkcq
44.9516	-2.60799	0.966185	-2.69927	0.00694918	0.0886009	75718	Vwa5b1
7.56976	-2.61944	0.959925	-2.7288	0.00635649	0.0833614	50905	Il17rb
121.081	-2.61949	0.544667	-4.80935	1.51419e-06	9.44925e-05	83671	Sytl2
524.845	-2.6234	0.283897	-9.24066	2.44971e-20	2.04294e-17	15483	Hsd11b1
8.47637	-2.62827	0.936953	-2.80513	0.00502966	0.0705152	66748	Erich2
261.701	-2.65664	0.625303	-4.24857	2.15137e-05	0.000928735	20393	Sgk1
23.6137	-2.66488	0.864481	-3.08264	0.00205175	0.0362306	74052	Ttc21a
76.4934	-2.66927	0.376748	-7.08503	1.39011e-12	3.80663e-10	12808	Cobl
178.083	-2.67508	0.569133	-4.70028	2.59811e-06	0.000149428	338367	Myo1d
213.362	-2.68533	0.391507	-6.85896	6.93626e-12	1.71972e-09	80888	Hspb8
15.6712	-2.69598	0.796781	-3.38358	0.000715463	0.0163266	207742	Rnf43
6.19044	-2.71694	0.951428	-2.85564	0.00429496	0.062939	20855	Stc1
80.179	-2.73367	0.706214	-3.87088	0.000108444	0.00369131	329977	Fhad1
18.2198	-2.74084	1.03133	-2.65758	0.00787048	0.0962664	100504234	Ccdc170
14.673	-2.74411	0.836546	-3.28028	0.00103703	0.021518	15186	Hdc
30.0062	-2.74843	0.674993	-4.07179	4.6654e-05	0.00177585	105853	Mal2
994.484	-2.74995	0.534332	-5.14653	2.65351e-07	2.09845e-05	53416	Stk39
17.0541	-2.75456	0.785404	-3.50719	0.000452862	0.0115238	19296	Pvt1
73.7018	-2.75691	0.689456	-3.99867	6.36987e-05	0.00232805	20446	St6galnac2
56.6726	-2.76094	0.532672	-5.18318	2.18131e-07	1.78663e-05	69536	Hemk1
25.4453	-2.77627	0.83778	-3.31384	0.000920232	0.0197281	94242	Tinagl1
142.962	-2.77721	0.481914	-5.76287	8.26963e-09	9.54232e-07	102502	Pls1
71.045	-2.77739	0.635617	-4.3696	1.24476e-05	0.000578165	75472	Cfap126
41.1055	-2.78422	0.815333	-3.41483	0.000638219	0.0149709	14013	Mecom
10.3741	-2.78635	0.853202	-3.26575	0.00109174	0.0222804	12364	Casp12
17.8287	-2.79462	0.911332	-3.06652	0.00216568	0.0377653	319951	A230001M10Rik
148.962	-2.80344	0.499017	-5.61793	1.93264e-08	2.03782e-06	211945	Plekhh1
7.76384	-2.81489	0.913443	-3.08162	0.00205877	0.0363195	545739	Gm5862
299.416	-2.81573	0.403444	-6.97925	2.96766e-12	7.77824e-10	399558	Flrt2
182.394	-2.8219	0.55129	-5.11873	3.07604e-07	2.40154e-05	18039	Nefl
26.7434	-2.8259	0.990999	-2.85157	0.00435044	0.0635997	208583	Nek11
30.5933	-2.82767	0.850848	-3.32335	0.000889423	0.0193115	103711	Pnpo
578.323	-2.83761	0.532097	-5.33288	9.66664e-08	8.82358e-06	77767	Ermn
8.15048	-2.83788	0.987704	-2.8732	0.0040633	0.0601082	75732	Iqcd
9.97465	-2.84138	0.928121	-3.06143	0.00220281	0.0381633	106618	Wdr90
21.6786	-2.8549	0.737475	-3.87118	0.00010831	0.00369131	72258	Kcnk10
46.4291	-2.85561	0.384085	-7.43485	1.04685e-13	3.42974e-11	77383	C030029H02Rik
17.7813	-2.86432	0.832353	-3.44124	0.000579063	0.0138379	20725	Serpinb8
1259.38	-2.86742	0.74899	-3.82838	0.000128989	0.00421846	69008	Cab39l
18.6683	-2.87489	0.842468	-3.41247	0.000643776	0.014989	104110	Adcy4
15.1564	-2.88894	0.766916	-3.76696	0.000165248	0.0051649	70737	Cgn
380.01	-2.89109	0.73949	-3.90958	9.24586e-05	0.00322498	333605	Frmpd4
861.696	-2.89985	0.770529	-3.76345	0.000167582	0.00521125	71310	Tbc1d9
10.9878	-2.91136	1.01245	-2.87557	0.00403298	0.059865	231605	Galnt9
15.6133	-2.93559	1.00813	-2.91191	0.00359221	0.0543781	17701	Msx1
17.9398	-2.95627	0.878283	-3.36596	0.000762769	0.0171712	238803	Zfp366
4.81077	-2.98576	1.13274	-2.63587	0.00839226	0.100373	NA	2010107G23Rik
10.1177	-2.98685	0.940605	-3.17545	0.00149602	0.0285211	71827	Lrrc34
17.4816	-2.99211	0.77997	-3.83619	0.000124958	0.00412339	71837	1700003E16Rik
13.0273	-2.99545	0.968615	-3.0925	0.00198475	0.0353895	12565	Cdh9
126.972	-3.00515	0.416338	-7.21806	5.2733e-13	1.5357e-10	320174	A830082K12Rik
124.142	-3.01972	0.485472	-6.22017	4.96613e-10	8.43645e-08	19130	Prox1
15.9817	-3.03079	0.997656	-3.03791	0.00238222	0.0402826	54132	Pdlim1
30.9241	-3.04565	0.827105	-3.6823	0.000231138	0.00674195	13008	Csrp2
78.0232	-3.04626	0.685153	-4.4461	8.74442e-06	0.000428968	16510	Kcnh1
14.5299	-3.0725	0.816582	-3.76263	0.000168136	0.00521963	13555	E2f1
105.418	-3.07884	0.575737	-5.34766	8.91008e-08	8.21474e-06	11744	Anxa11
9.99606	-3.08157	0.92327	-3.33767	0.000844832	0.0185408	NA	Ppap2c
19.6055	-3.08481	1.12657	-2.73824	0.00617699	0.0817671	278507	Wfikkn2
83.3304	-3.08634	0.591382	-5.21885	1.80033e-07	1.4946e-05	76484	Kndc1
31.6867	-3.09718	0.864779	-3.58146	0.000341675	0.00913805	381605	Tbc1d2
299.748	-3.09795	0.303032	-10.2232	1.56172e-24	2.04663e-21	245049	Myrip
21.1191	-3.0985	0.882264	-3.51199	0.000444769	0.0113494	17926	Myoc
170.105	-3.10576	0.6108	-5.08475	3.68114e-07	2.79082e-05	353169	Slc2a12
9.18414	-3.10589	0.886551	-3.50334	0.000459459	0.0116272	620592	Tmem28
96.1582	-3.11137	0.412401	-7.54452	4.5394e-14	1.5423e-11	240690	St18
296.432	-3.11849	0.564349	-5.52581	3.27966e-08	3.30615e-06	74008	Arsg
28.9952	-3.12322	0.824463	-3.78819	0.000151748	0.00483355	74405	Efhc2
231.319	-3.12434	0.970168	-3.22041	0.00128005	0.0251986	12319	Car8
27.1429	-3.13469	0.805457	-3.89182	9.94962e-05	0.00342487	75563	Dnali1
11.4661	-3.14131	0.920284	-3.41342	0.000641536	0.014989	211482	Efhb
18.348	-3.15947	1.04711	-3.01731	0.00255028	0.0423056	74023	Rd3
19.0634	-3.1712	0.856036	-3.70452	0.000211795	0.00624727	16878	Lif
15.0017	-3.1952	1.17556	-2.71803	0.00656713	0.0853913	69952	Tunar
9.38122	-3.19786	1.0821	-2.95524	0.0031243	0.0490229	230678	Tmem125
21.0091	-3.21844	0.862633	-3.73095	0.000190762	0.00576591	399548	Scn4b
21.0779	-3.22019	0.996339	-3.23202	0.00122917	0.0244594	54631	Nphs1
13.2852	-3.22255	1.03395	-3.11675	0.00182859	0.0331841	72179	Fbxl2
16.7703	-3.23809	0.869954	-3.72214	0.000197541	0.00593174	227580	C1ql3
24.6841	-3.25576	0.863341	-3.77111	0.000162521	0.00511454	239827	Pigz
7.21126	-3.26714	1.0397	-3.14238	0.00167583	0.0310884	68625	Cfap57
53.5103	-3.2857	0.84605	-3.88357	0.000102932	0.00352989	18040	Nefm
116.84	-3.29003	0.440479	-7.46923	8.0667e-14	2.6909e-11	110862	Kcnq3
1707.33	-3.31955	0.756118	-4.39025	1.13221e-05	0.000535376	16002	Igf2
124.615	-3.33077	0.635546	-5.24079	1.59887e-07	1.33947e-05	75739	Mpp7
21.5782	-3.35367	1.09426	-3.06478	0.00217829	0.0378989	244954	Prss35
10.1951	-3.3967	0.956965	-3.54945	0.000386041	0.0100528	216795	Wnt9a
8.38168	-3.39714	1.23683	-2.74665	0.00602074	0.0805866	436022	Dnaaf3
30.8244	-3.40934	0.973019	-3.50388	0.000458538	0.0116199	216033	Ctnna3
12.3533	-3.42002	1.02291	-3.34342	0.000827536	0.0182267	433698	Fam205a1
48.1217	-3.42474	0.907887	-3.77221	0.000161807	0.00510081	212517	Cfap44
28.1226	-3.44566	1.05981	-3.25121	0.00114916	0.0233743	16956	Lpl
42.8789	-3.469	0.588478	-5.89486	3.74992e-09	4.81117e-07	50723	Icosl
4.47617	-3.47108	1.29805	-2.67407	0.00749366	0.0935819	22599	Slc6a20b
15.4479	-3.47884	1.00268	-3.46953	0.000521376	0.0128226	20308	Ccl9
15.4376	-3.48622	1.0505	-3.31862	0.000904625	0.0195261	230603	Ttc39a
16.4571	-3.48734	1.00047	-3.48569	0.000490876	0.0121704	218440	Ankrd34b
25.5084	-3.50081	0.823333	-4.25199	2.11879e-05	0.000916828	237504	Rassf9
9.19832	-3.50144	1.2383	-2.82761	0.00468963	0.0673772	16399	Itga2b
65.8689	-3.50981	0.812678	-4.31882	1.56865e-05	0.000708867	75050	Kif27
17.975	-3.51558	0.915133	-3.84161	0.000122231	0.0040553	70363	Fam135b
16.2815	-3.51895	1.15848	-3.03756	0.00238502	0.0402928	71145	Scara5
26.9081	-3.54318	0.86615	-4.09073	4.30025e-05	0.00165402	244757	Glb1l2
82.6413	-3.55281	1.04099	-3.41293	0.000642681	0.014989	380684	Nefh
65.2224	-3.608	0.833741	-4.32749	1.50821e-05	0.000686628	22317	Vamp1
19.1712	-3.61086	1.01727	-3.54955	0.000385885	0.0100528	17152	Mak
21.6297	-3.63118	1.19134	-3.04799	0.00230381	0.0394291	244958	Mrap2
5.36626	-3.63748	1.29306	-2.81309	0.00490685	0.0694645	382105	Fbxw15
22.3695	-3.64541	0.884652	-4.12073	3.77669e-05	0.00147427	12869	Cox8b
13.4255	-3.71684	1.18495	-3.13671	0.00170853	0.0315356	217325	Llgl2
277.758	-3.71891	0.416426	-8.93054	4.23923e-19	2.99143e-16	19894	Rph3a
87.5362	-3.73792	0.714034	-5.23494	1.65042e-07	1.37637e-05	545611	Fam205a2
12.5536	-3.74847	1.35853	-2.75921	0.00579414	0.0786862	64378	Gpr88
266.676	-3.76197	0.429172	-8.76566	1.85682e-18	1.17472e-15	22634	Plagl1
53.3916	-3.77271	0.768222	-4.91096	9.06334e-07	6.13623e-05	98845	Eps8l2
131.929	-3.79507	0.492139	-7.71139	1.24456e-14	4.39113e-12	108816	4933409K07Rik
18.2257	-3.81722	0.846978	-4.50686	6.57935e-06	0.000340032	140904	Caln1
71.7846	-3.83035	0.580951	-6.59323	4.30358e-11	8.87165e-09	57339	Jph1
72.5508	-3.83214	0.791629	-4.84083	1.29297e-06	8.26553e-05	320183	Msrb3
54.8851	-3.83678	1.28758	-2.97985	0.00288394	0.0463369	329941	Col8a2
37.4457	-3.8457	0.753975	-5.10057	3.38637e-07	2.59957e-05	230718	Nt5c1a
14.531	-3.84898	1.16276	-3.3102	0.000932283	0.0198572	67451	Pkp2
6.63714	-3.87175	1.37331	-2.81929	0.00481299	0.0688262	22784	Slc30a3
9.0708	-3.88545	1.3082	-2.97008	0.00297721	0.0472516	100038949	Gm1979
16.6744	-3.88902	1.01489	-3.83196	0.000127124	0.00418174	26380	Esrrb
92.0639	-3.9298	1.09307	-3.59521	0.000324129	0.00878403	74978	Lrriq1
10.7	-3.94105	1.38716	-2.84109	0.00449591	0.0653099	218518	Marveld2
5.56515	-3.94665	1.51945	-2.59743	0.00939256	0.109343	70898	Slain1os
830.045	-3.95243	0.818989	-4.82598	1.39313e-06	8.72348e-05	320609	Strip2
64.5337	-3.98297	0.759805	-5.24209	1.58767e-07	1.33619e-05	233813	Vwa3a
5.29617	-3.99384	1.35297	-2.9519	0.00315827	0.0492728	66255	Hsbp1l1
65.6597	-4.02193	1.10834	-3.62879	0.000284749	0.00793964	26360	Angptl2
17.2048	-4.11234	0.90437	-4.54719	5.43678e-06	0.000284996	60613	Kcnq4
10.4342	-4.11645	1.18023	-3.48785	0.000486919	0.012105	320802	Ifitm10
54.9166	-4.12226	0.678731	-6.07348	1.25165e-09	1.85194e-07	223473	Nipal2
39.6526	-4.14014	0.955012	-4.33517	1.45646e-05	0.000664719	381622	5031410I06Rik
41.3276	-4.14493	0.921919	-4.49598	6.92503e-06	0.00035391	212190	Ubxn10
11.1563	-4.14523	1.25302	-3.3082	0.000938991	0.0198843	216343	Tph2
11.133	-4.19513	1.24199	-3.37776	0.000730796	0.0166351	67573	Loxl4
10.6589	-4.19615	1.34691	-3.11539	0.00183701	0.0333039	74453	Cfap53
13.3193	-4.24141	1.26085	-3.36394	0.000768394	0.0172344	381546	Ccdc24
207.244	-4.28553	0.656556	-6.52728	6.69743e-11	1.30721e-08	18719	Pip5k1b
595.81	-4.28889	0.828748	-5.17514	2.27738e-07	1.85703e-05	18424	Otx2
22.6926	-4.29313	1.13095	-3.79604	0.000147024	0.00471582	78754	Galnt15
7.71836	-4.33461	1.51251	-2.86583	0.00415917	0.0612426	242546	Cyp2j12
7.9887	-4.3457	1.19319	-3.64208	0.000270439	0.0076482	225608	Sh3tc2
16.0216	-4.35392	1.06264	-4.09725	4.18083e-05	0.00161486	18013	Neurod2
20.634	-4.41332	1.22072	-3.61533	0.000299969	0.00823883	230161	Acnat1
4.3739	-4.41909	1.57693	-2.80233	0.00507342	0.0708926	NA	4933413G19Rik
4.35052	-4.42424	1.65663	-2.67063	0.0075709	0.0942356	75504	1700013F07Rik
4.39004	-4.42572	1.46919	-3.01235	0.00259232	0.0427709	14187	Akr1b8
75.4751	-4.43821	0.536273	-8.27603	1.27349e-16	5.56304e-14	236643	Sytl5
2.31859	-4.47527	1.62526	-2.75358	0.00589478	0.0794064	75434	1700001C02Rik
28.7741	-4.48979	1.01556	-4.42098	9.82543e-06	0.000474387	12828	Col4a3
111.636	-4.49427	0.980567	-4.58334	4.57617e-06	0.000245887	22673	Zfp185
2.33404	-4.49437	1.69299	-2.6547	0.00793789	0.0968972	319983	9330111N05Rik
4.64733	-4.50153	1.73119	-2.60025	0.00931565	0.108724	76478	Haus8
22.6808	-4.50307	1.0137	-4.44223	8.90303e-06	0.000435584	114602	Zmynd10
60.7359	-4.52114	0.932194	-4.84999	1.23465e-06	7.94811e-05	20733	Spint2
24.5914	-4.52283	1.25684	-3.59858	0.000319956	0.00869464	239789	Gmnc
174.081	-4.53006	1.0141	-4.4671	7.92876e-06	0.000394225	12577	Cdkn1c
126.936	-4.54703	0.762055	-5.9668	2.41957e-09	3.2641e-07	75767	Rab11fip1
86.8441	-4.57179	1.07303	-4.26063	2.03853e-05	0.000888382	14077	Fabp3
5.06753	-4.63393	1.53603	-3.01682	0.0025544	0.0423357	214253	Etnk2
5.21166	-4.64694	1.64267	-2.8289	0.00467079	0.0672118	414101	E130317F20Rik
5.16832	-4.68132	1.74188	-2.68751	0.00719875	0.090836	13164	Dazl
2.70286	-4.73032	1.72822	-2.73711	0.00619816	0.0818112	216227	Slc17a8
14.3619	-4.74264	1.24338	-3.81431	0.000136564	0.00443458	434689	Gm10220
226.348	-4.7646	0.448421	-10.6253	2.27296e-26	3.47516e-23	19049	Ppp1r1b
8.91974	-4.7652	1.47833	-3.22336	0.00126696	0.0250214	74230	1700016K19Rik
129.359	-4.76815	0.711713	-6.69954	2.09071e-11	4.56646e-09	17919	Myo5b
27.4766	-4.78999	0.927301	-5.16551	2.39782e-07	1.93801e-05	76477	Pcolce2
22.1518	-4.79699	1.08342	-4.42765	9.52667e-06	0.000462396	217169	Tns4
65.0341	-4.79767	0.940385	-5.10182	3.36407e-07	2.5933e-05	212892	Rsph4a
255.394	-4.80035	1.04682	-4.58566	4.52562e-06	0.000244211	245945	Rbm47
23.6779	-4.80483	1.05375	-4.55973	5.12201e-06	0.000272387	20147	Rs1
5.97883	-4.8491	1.64777	-2.94282	0.00325233	0.0503974	NA	Fam46d
3.03163	-4.88612	1.88324	-2.59453	0.00947191	0.10978	636791	Gm9866
11.2376	-4.90767	1.53559	-3.19595	0.00139373	0.027059	72433	Rab38
3.09909	-4.91862	1.84536	-2.66539	0.00768981	0.0948789	433456	4631405J19Rik
17.7409	-4.95094	1.19529	-4.14204	3.44227e-05	0.00136718	58220	Pard6b
3.20122	-4.95216	1.63842	-3.02253	0.00250675	0.0417724	68994	1500015L24Rik
3.18205	-4.97907	1.86791	-2.66559	0.00768536	0.0948789	70785	Dennd1c
3.27563	-5.01165	1.91883	-2.61182	0.00900617	0.105785	219170	Fam216b
3.37867	-5.0288	1.77582	-2.83182	0.00462832	0.0668102	74362	Spag17
3.31431	-5.03046	1.81902	-2.76548	0.00568394	0.0774189	11522	Adh1
60.8429	-5.05222	0.814408	-6.20355	5.52024e-10	8.96282e-08	19752	Rnase1
7.02437	-5.08815	1.72567	-2.94851	0.00319311	0.0496474	NA	1700026D08Rik
3.53584	-5.09074	1.71073	-2.97577	0.00292252	0.0467476	68270	Dnaaf1
3.55051	-5.09259	1.90457	-2.67388	0.00749798	0.0935819	234724	Tat
13.8608	-5.09435	1.40269	-3.63184	0.000281407	0.0078824	75973	Ccdc162
12.0119	-5.10487	1.54319	-3.308	0.000939645	0.0198843	57435	Plin4
150.229	-5.12694	0.996167	-5.14666	2.6516e-07	2.09845e-05	243328	Slc29a4
3.66825	-5.15787	1.70837	-3.01918	0.00253463	0.042084	76415	Fam187b
1050.36	-5.15834	0.946494	-5.44994	5.03872e-08	4.91731e-06	320707	Atp2b3
264.887	-5.18159	1.06166	-4.88067	1.05726e-06	6.97752e-05	11304	Abca4
3.64047	-5.1897	1.95884	-2.64938	0.00806407	0.0981111	18979	Pon1
3.7941	-5.19875	1.64514	-3.16007	0.00157731	0.0295898	56863	Cldn9
3.81234	-5.20277	1.73569	-2.99752	0.00272186	0.044232	NA	1700007G11Rik
249.53	-5.21757	0.982924	-5.30822	1.10703e-07	9.85953e-06	16803	Lbp
3.82252	-5.25756	1.92285	-2.73425	0.00625217	0.0822568	11433	Acp5
27.0402	-5.2872	1.08521	-4.87203	1.10457e-06	7.23769e-05	104601	Mycbpap
198.98	-5.30139	0.980308	-5.40788	6.37749e-08	6.12606e-06	18162	Npr3
4.07341	-5.30435	1.87148	-2.83432	0.0045924	0.0664486	71647	4930447N08Rik
8.20962	-5.31235	1.59912	-3.32204	0.000893626	0.0193799	319616	5930412G12Rik
4.11691	-5.31389	1.73774	-3.05793	0.00222873	0.0384671	103655	Sec14l4
4.16554	-5.37392	1.50022	-3.58209	0.00034086	0.00913805	192650	Cabp7
67.254	-5.39398	0.855193	-6.30733	2.83897e-10	4.96063e-08	13056	Cyb561
31.2075	-5.41693	1.00912	-5.36795	7.96354e-08	7.45444e-06	73940	Hapln2
17.8572	-5.43284	1.40007	-3.8804	0.000104283	0.00356957	14912	Nkx6-2
4.66668	-5.44165	1.91917	-2.83542	0.00457652	0.0663233	71091	Cdkl1
4.51954	-5.46335	1.84924	-2.95438	0.00313294	0.0490443	29870	Gtse1
9.14465	-5.47689	1.68674	-3.24702	0.00116621	0.0235903	613264	1810020O05Rik
9.10078	-5.48501	1.48636	-3.69023	0.000224047	0.00656644	216393	D930020B18Rik
71.9953	-5.49588	1.21994	-4.50504	6.6359e-06	0.000341991	109620	Dsp
4.74368	-5.49839	2.11617	-2.59828	0.0093692	0.109141	NA	Fam19a4
33.5131	-5.55137	1.53904	-3.60705	0.000309702	0.00848074	NA	1700003M02Rik
4.77032	-5.55666	1.85832	-2.99015	0.00278842	0.0451139	12821	Col17a1
94.7158	-5.58389	1.34894	-4.13945	3.48132e-05	0.00137359	12737	Cldn1
5.04429	-5.59683	1.62119	-3.45229	0.00055585	0.0134541	320333	D830030K20Rik
4.87919	-5.61047	1.65288	-3.39437	0.000687873	0.0158541	228677	Sptlc3
5.21052	-5.62482	1.72346	-3.26367	0.00109978	0.0224195	27219	Sgk2
32.8377	-5.63057	1.19289	-4.7201	2.35733e-06	0.000137301	71860	Cfap52
16.7264	-5.663	1.42492	-3.97426	7.05984e-05	0.00255982	338403	Cndp1
10.1181	-5.67545	1.76955	-3.20729	0.00133992	0.0261527	NA	Tmem27
5.47337	-5.70412	1.74403	-3.27065	0.001073	0.0220452	74685	Lrrc74b
5.37011	-5.71999	2.2059	-2.59304	0.00951329	0.110051	17075	Epcam
5.70657	-5.79319	1.71161	-3.38465	0.000712683	0.0162834	231832	Tmem184a
5.81517	-5.80585	1.99471	-2.91062	0.00360716	0.0545595	353287	Clec18a
11.3338	-5.81821	1.41963	-4.09839	4.16031e-05	0.00161032	606497	Otx2os1
5.8504	-5.81821	1.7752	-3.2775	0.00104732	0.0216388	73608	Marveld3
6.57813	-5.92066	1.60544	-3.68788	0.000226134	0.00661702	63993	Slc5a7
6.59148	-5.97694	1.43321	-4.17031	3.04181e-05	0.00122655	105120	AI197445
6.72594	-5.99918	1.40674	-4.2646	2.00261e-05	0.000875489	14172	Fgf18
13.4363	-6.03809	1.70868	-3.53378	0.000409657	0.0105859	332942	Gm853
40.0838	-6.04406	1.08378	-5.57683	2.44937e-08	2.52464e-06	381113	Cdkl4
1299.34	-6.0469	0.859077	-7.03883	1.93867e-12	5.23072e-10	209195	Clic6
7.08577	-6.06685	1.71026	-3.54733	0.000389153	0.0100987	100042539	Gm3893
6.80895	-6.06984	1.65243	-3.67329	0.000239452	0.00695129	77630	Prdm8
7.12434	-6.07812	2.07043	-2.93568	0.00332822	0.0511413	16373	Irx3
6.9847	-6.09898	1.89933	-3.21112	0.0013222	0.0258343	246081	Defb11
14.1071	-6.10103	1.49788	-4.07311	4.6389e-05	0.00176944	432995	Smim22
150.992	-6.10156	0.99514	-6.13136	8.71314e-10	1.34336e-07	66898	Baiap2l1
7.19181	-6.10695	2.10198	-2.90534	0.00366859	0.0553061	56087	Dnah10
7.07538	-6.11231	1.40896	-4.33819	1.43661e-05	0.000657296	100503676	Gm38426
7.19884	-6.122	1.86834	-3.2767	0.00105026	0.0216508	16420	Itgb6
7.16515	-6.12971	1.60913	-3.80934	0.000139338	0.00450076	224912	Crb3
7.26184	-6.13645	1.77638	-3.45446	0.000551388	0.0133637	16334	Ins2
7.44482	-6.14892	1.47185	-4.17767	2.94512e-05	0.00120301	243385	Gprin3
7.27069	-6.15905	1.64089	-3.75349	0.000174391	0.00538645	67968	Ooep
7.53312	-6.16537	1.56865	-3.93035	8.48208e-05	0.00299847	378776	Pcsk2os1
8.0507	-6.26413	2.02708	-3.09022	0.00200011	0.0355581	71296	Crnde
8.07446	-6.29753	1.84989	-3.40427	0.000663417	0.0153103	NA	1700026L06Rik
8.77045	-6.39345	1.89923	-3.36634	0.000761729	0.0171689	NA	BC021891
17.496	-6.43191	1.46984	-4.37591	1.20925e-05	0.000564534	27375	Tjp3
8.83903	-6.44948	1.80948	-3.56426	0.000364877	0.0096184	69083	Sult1c2
242.177	-6.4827	1.16343	-5.57207	2.51731e-08	2.58017e-06	12738	Cldn2
9.46396	-6.50307	1.46489	-4.43928	9.02623e-06	0.000440437	320256	Dlec1
18.4625	-6.50705	1.4901	-4.36686	1.26045e-05	0.000582506	244608	Ccdc113
9.60273	-6.50871	1.73893	-3.74294	0.000181877	0.00555224	13799	En2
18.2286	-6.51928	1.57951	-4.12741	3.66865e-05	0.00143822	11922	Neurod6
68.278	-6.52017	1.08076	-6.03298	1.60967e-09	2.28935e-07	63873	Trpv4
9.45423	-6.52694	1.71245	-3.81147	0.000138143	0.00447792	17201	Mc3r
453.069	-6.54636	0.982706	-6.66157	2.70923e-11	5.71335e-09	15560	Htr2c
19.0798	-6.55323	2.04033	-3.21185	0.00131885	0.0258188	75084	4930511M06Rik
10.095	-6.6037	1.38634	-4.7634	1.90353e-06	0.000113599	212706	N4bp3
10.8703	-6.69343	1.85108	-3.61596	0.00029924	0.00823111	14255	Flt3
10.9644	-6.70324	1.94668	-3.44343	0.000574386	0.0137577	22423	Wnt8b
11.2446	-6.77136	1.6756	-4.04116	5.31868e-05	0.00199554	100043902	Six3os1
11.1699	-6.78473	1.69372	-4.00582	6.18028e-05	0.00227459	20132	Rrh
58.2538	-6.82948	1.14586	-5.96011	2.52061e-09	3.35114e-07	208943	Myo5c
23.1479	-6.83444	1.60638	-4.25457	2.09452e-05	0.000908467	NA	Gm11744
57.0898	-6.85471	1.47531	-4.64628	3.37977e-06	0.000190211	20347	Sema3b
12.3938	-6.91164	1.54052	-4.48658	7.23762e-06	0.000366819	27260	Plek2
13.1685	-6.97446	1.4667	-4.7552	1.98254e-06	0.000117335	81600	Chia1
14.0324	-7.086	1.44157	-4.91549	8.85614e-07	6.04028e-05	226438	Igfn1
28.8241	-7.1581	1.45179	-4.93053	8.20071e-07	5.63514e-05	382427	Best3
14.7745	-7.16583	2.59872	-2.75745	0.00582546	0.0787798	240590	Dmrt3
31.6032	-7.30362	1.3573	-5.38099	7.40794e-08	7.00585e-06	70358	Steap1
16.5239	-7.32324	1.41681	-5.16882	2.35573e-07	1.91241e-05	66770	4933429O19Rik
16.851	-7.32488	1.63004	-4.49368	7.00027e-06	0.000356761	20980	Syt2
16.6811	-7.33215	1.53749	-4.7689	1.85237e-06	0.000111428	235345	4833427G06Rik
17.1825	-7.37787	2.41753	-3.05182	0.00227458	0.0391847	240879	Mettl11b
17.3408	-7.39535	1.67741	-4.40879	1.03952e-05	0.000494095	114304	Slc28a3
100.368	-7.4281	1.08215	-6.86419	6.68697e-12	1.68063e-09	75600	Calml4
17.8057	-7.44026	1.45321	-5.11989	3.05711e-07	2.39695e-05	194597	Tmprss11a
18.2191	-7.46897	1.63442	-4.5698	4.88185e-06	0.00026037	12922	Crhr2
18.4797	-7.47097	1.48269	-5.03878	4.68499e-07	3.42452e-05	71200	Dydc2
36.8836	-7.52147	1.49092	-5.04485	4.53886e-07	3.33098e-05	73472	Spata18
19.066	-7.52319	2.8223	-2.66562	0.0076847	0.0948789	54352	Irx5
20.3598	-7.62534	1.5938	-4.78437	1.71522e-06	0.000104549	16691	Krt8
21.0955	-7.68322	1.54915	-4.95963	7.0627e-07	4.96473e-05	67701	Wfdc2
21.1836	-7.68615	1.61971	-4.74538	2.08117e-06	0.000122382	20473	Six3
22.319	-7.7549	1.54554	-5.01761	5.23184e-07	3.77908e-05	330721	Nek5
25.3615	-7.93149	1.512	-5.2457	1.55691e-07	1.31634e-05	78801	Ak7
26.4288	-7.9908	1.50592	-5.30625	1.11901e-07	9.91811e-06	269016	Sh3rf2
26.3194	-7.99577	2.19589	-3.64125	0.00027132	0.00765833	18431	Oca2
26.7366	-8.014	1.98106	-4.0453	5.22555e-05	0.00196462	22062	Trp73
58.9783	-8.19636	1.38707	-5.9091	3.43987e-09	4.47598e-07	381350	Spag6
30.8509	-8.22347	1.44564	-5.68846	1.28188e-08	1.44286e-06	13511	Dsg2
60.8923	-8.24555	1.39942	-5.89211	3.81304e-09	4.85819e-07	546144	Wdr72
1521.72	-8.31033	1.46429	-5.67532	1.38429e-08	1.52082e-06	19116	Prlr
66.287	-8.35879	1.44068	-5.80199	6.5533e-09	7.85839e-07	NA	Ccdc108
38.6129	-8.53752	1.42086	-6.00872	1.86994e-09	2.57954e-07	110648	Lmx1a
41.0491	-8.6375	1.41152	-6.11927	9.40038e-10	1.43724e-07	242253	Wdr63
243.607	-8.73924	1.85249	-4.71757	2.38683e-06	0.000138142	232174	Cyp26b1
169.657	-8.7429	1.32639	-6.59152	4.35357e-11	8.87499e-09	330830	Drc7
399.7	-8.78019	1.36869	-6.41504	1.40785e-10	2.60907e-08	66042	Sostdc1
2156.96	-8.94455	1.05983	-8.43964	3.18303e-17	1.71762e-14	16591	Kl
64.6176	-9.28727	1.42051	-6.53799	6.23513e-11	1.23006e-08	269633	Wdr86
75.7756	-9.51749	1.65082	-5.7653	8.15117e-09	9.46516e-07	16668	Krt18
78.0007	-9.55867	1.62747	-5.87334	4.27111e-09	5.40428e-07	330355	Dnah6
103.517	-9.96862	1.53072	-6.51239	7.39653e-11	1.41441e-08	71889	Epn3
355.21	-9.98468	1.49322	-6.68667	2.28307e-11	4.87064e-09	246133	Kcne2
145.996	-10.4643	1.72564	-6.06399	1.32787e-09	1.949e-07	14275	Folr1
196.113	-10.8895	1.67214	-6.5123	7.40084e-11	1.41441e-08	319776	Tmem72
196.462	-10.8921	1.47886	-7.36522	1.76854e-13	5.49956e-11	68800	Prr32
579.579	-12.4526	1.6942	-7.35015	1.97977e-13	6.05382e-11	232156	Slc4a5
64020.8	-13.1794	1.10679	-11.9078	1.07774e-32	2.47167e-29	22139	Ttr

## Sheet: HC_specific_DEGs
baseMean	log2FoldChange	lfcSE	stat	pvalue	padj	ExtrezID	GeneSymbol
14.7745	6.44621	0.950455	6.78224	1.18328e-11	9.17457e-08	240590	Dmrt3
3.39723	5.46042	2.04049	2.67603	0.00745003	0.285674	244694	Kdm4d
2.9765	5.23177	1.64741	3.17575	0.00149448	0.134738	20888	Sult1c1
5.37011	5.1644	1.69076	3.05448	0.00225451	0.162752	17075	Epcam
2.43055	4.89825	1.67776	2.91952	0.00350575	0.197686	15562	Htr4
2.43846	4.87365	1.64876	2.95596	0.00311702	0.188811	14409	Gabrr2
3.62859	4.67874	1.28613	3.63785	0.000274924	0.0453536	74129	Dmgdh
2.02279	4.66323	1.68257	2.77149	0.00558003	0.248648	381489	Rxfp1
2.33545	4.34031	1.65552	2.62172	0.00874881	0.302156	13041	Ctsw
1.9964	4.17407	1.61286	2.58799	0.00965379	0.316493	78709	Spink8
3.64047	4.16941	1.47378	2.82906	0.00466848	0.228329	18979	Pon1
8.83903	4.12332	1.3566	3.03944	0.00237015	0.165278	69083	Sult1c2
3.84966	4.0649	1.45035	2.8027	0.00506769	0.23667	16876	Lhx9
11.1699	4.02804	1.21489	3.31555	0.000914632	0.0958733	20132	Rrh
4.36055	4.01482	1.44343	2.78145	0.00541167	0.245327	18167	Npy2r
28.8913	3.87816	0.936578	4.14077	3.46141e-05	0.0111825	107376	E330013P04Rik
18.2286	3.86963	1.05148	3.68016	0.000233089	0.0401612	11922	Neurod6
3.26868	3.83358	1.4818	2.58712	0.00967831	0.316628	320225	Catsperg1
4.90212	2.96615	1.08186	2.74171	0.00611201	0.257911	319701	Fbxo48
7.5895	2.94393	1.01243	2.90778	0.00364001	0.200162	98970	Fibcd1
6.7332	2.87159	1.02395	2.80441	0.0050408	0.23667	77220	Tmem200a
6.94627	2.63283	0.87956	2.99335	0.00275936	0.179035	59058	Bhlhe22
18.9612	2.58048	0.911713	2.83036	0.00464959	0.228329	13447	Doc2b
23.7558	2.44621	0.854785	2.86178	0.00421272	0.217032	320924	Ccbe1
8.80097	2.25597	0.749097	3.01158	0.00259889	0.172965	14447	Gapdhs
30.4034	2.22919	0.627387	3.55313	0.000380672	0.0584463	100038732	Gm11681
22.5538	2.17497	0.78266	2.77895	0.00545355	0.245327	20562	Slit1
9.04616	2.11723	0.768141	2.75631	0.00584574	0.255518	327954	Dnah2
9.7547	2.00443	0.734007	2.73081	0.00631787	0.260786	66667	Hspbap1
19.6087	1.93825	0.652094	2.97234	0.00295535	0.183076	22004	Tpm2
30.0062	1.90134	0.68396	2.77989	0.00543766	0.245327	105853	Mal2
170.105	1.87469	0.718699	2.60845	0.00909526	0.307638	353169	Slc2a12
35.0089	1.78754	0.642828	2.78074	0.00542347	0.245327	20564	Slit3
78.6617	1.74618	0.653852	2.6706	0.00757154	0.285674	NA	6330403A02Rik
114.197	1.73607	0.666883	2.60327	0.00923404	0.30927	16847	Lepr
86.0491	1.71368	0.628934	2.72474	0.00643523	0.263014	69590	Gpx8
23.3728	1.62655	0.607934	2.67554	0.00746095	0.285674	17390	Mmp2
1534.08	1.62039	0.292154	5.54638	2.91644e-08	5.65316e-05	74318	Hopx
30.8059	1.57839	0.460395	3.42833	0.000607304	0.0784789	66790	Grtp1
61.798	1.54363	0.485988	3.17626	0.00149186	0.134738	18164	Nptx1
28.5077	1.54228	0.586291	2.63058	0.00852401	0.30004	73010	Gpr22
64.1154	1.51106	0.565746	2.67091	0.00756461	0.285674	14051	Eya4
18.8777	1.42314	0.523578	2.71811	0.00656564	0.265831	100198	H6pd
18.341	1.31026	0.473991	2.76431	0.00570427	0.252732	215210	Tmem120a
27.216	1.26778	0.435896	2.90845	0.00363228	0.200162	320770	A630072M18Rik
27.9126	1.26699	0.490742	2.58178	0.0098293	0.318876	56525	Zfp235
47.0281	1.24479	0.470843	2.64375	0.00819922	0.296624	14811	Grin2a
59.5316	1.23507	0.437512	2.82293	0.00475865	0.231324	101401	Adamts9
48.6309	1.22956	0.427436	2.87659	0.00402002	0.211317	110197	Dgkg
293.23	1.19	0.439225	2.70931	0.00674235	0.271568	14048	Eya1
99.3068	1.18781	0.445416	2.66675	0.00765877	0.286871	18074	Nid2
59.582	1.11474	0.356915	3.12326	0.0017886	0.144827	16852	Lgals1
209.71	1.0046	0.348411	2.88337	0.00393449	0.208233	63955	Cables1
286.513	0.975264	0.329444	2.96034	0.00307304	0.186877	15512	Hspa2
551.367	0.972845	0.336566	2.8905	0.00384626	0.204962	109624	Cald1
45.5171	0.934004	0.32102	2.90949	0.00362018	0.200162	208982	Hmgcll1
32.1511	0.923105	0.348373	2.64976	0.00805488	0.295288	59045	Stard3
397.274	0.870007	0.276446	3.14711	0.00164893	0.14127	21835	Thrsp
111.236	0.85311	0.193105	4.41786	9.96842e-06	0.00534964	238317	Elmsan1
117.084	0.811379	0.297041	2.73154	0.00630386	0.260786	72057	Phf10
60.9344	0.766956	0.288271	2.66054	0.0078015	0.289421	14910	Gt(ROSA)26Sor
127.833	0.751777	0.284103	2.64614	0.00814163	0.296624	380629	Heca
106.282	-0.754055	0.287868	-2.61945	0.00880716	0.302974	70381	Tecpr1
380.62	-0.75517	0.288312	-2.61928	0.00881159	0.302974	75906	Fam184a
56.916	-0.756607	0.283687	-2.66705	0.00765202	0.286871	NA	Tmem261
55.687	-0.761658	0.278942	-2.73053	0.00632331	0.260786	67534	Ttll4
2213.77	-0.780698	0.260491	-2.99702	0.00272629	0.177633	14571	Gpd2
128.839	-0.789625	0.28614	-2.75958	0.00578765	0.254969	71973	Rbpms2
118.398	-0.807808	0.269137	-3.00147	0.0026868	0.175798	19376	Rab34
94.5683	-0.811396	0.300543	-2.69977	0.00693877	0.274489	15354	Hmgb3
75.49	-0.813108	0.283217	-2.87097	0.00409212	0.213492	594844	Tceal3
124.878	-0.819157	0.315143	-2.59932	0.00934087	0.31202	18408	Slc25a15
81.1804	-0.821233	0.260438	-3.15328	0.00161448	0.139865	233887	Zfp553
559.036	-0.821257	0.198088	-4.14593	3.38435e-05	0.0111825	99730	Taf13
603.779	-0.822022	0.293495	-2.8008	0.00509755	0.23667	11539	Adora1
43.8715	-0.823106	0.315715	-2.60712	0.00913079	0.307807	105827	Amigo2
452.382	-0.824811	0.28396	-2.90468	0.00367633	0.200735	20681	Sox8
441.552	-0.839773	0.31544	-2.66222	0.00776264	0.289061	223739	5031439G07Rik
97.1938	-0.840989	0.31134	-2.7012	0.00690907	0.274013	239099	Homez
182.283	-0.856382	0.32983	-2.59643	0.00941979	0.312789	13406	Dmp1
372.661	-0.858363	0.314801	-2.72669	0.00639738	0.263008	14924	Magi1
1320.63	-0.863677	0.325874	-2.65034	0.00804106	0.295288	67216	Mboat2
221.101	-0.870976	0.318024	-2.73871	0.00616807	0.258855	NA	Dscr3
189.542	-0.871331	0.330083	-2.63973	0.00829717	0.298525	NA	Fam65b
48.3187	-0.881777	0.327323	-2.69391	0.00706199	0.277241	214084	Slc18a2
216.706	-0.890974	0.270382	-3.29524	0.000983388	0.101442	17242	Mdk
109.16	-0.940447	0.334789	-2.80907	0.00496849	0.236338	NA	Fam212b
98.2147	-0.941088	0.244172	-3.85419	0.000116111	0.0262456	226548	Aph1a
1203.92	-0.949562	0.277189	-3.42568	0.000613259	0.0785935	NA	Fam21
177.016	-0.960257	0.317174	-3.02754	0.00246553	0.167688	237253	Lrp11
288.348	-0.966462	0.31621	-3.05639	0.0022402	0.162752	65112	Pmepa1
445.541	-0.967557	0.340446	-2.84203	0.00448278	0.223566	16979	Lrrn1
1866.65	-0.981092	0.337258	-2.90902	0.00362559	0.200162	76257	Slc38a3
374.371	-0.986017	0.336996	-2.92591	0.00343454	0.196602	170768	Pfkfb3
3520.78	-0.990973	0.372299	-2.66177	0.00777315	0.289061	631990	Cdr1
1064.71	-0.993598	0.328012	-3.02915	0.00245244	0.167533	56524	Mpp6
308.256	-0.99384	0.353992	-2.80752	0.00499252	0.23667	14167	Fgf12
70.3584	-1.00527	0.377391	-2.66373	0.00772806	0.288769	230657	Tmem69
159.99	-1.01311	0.381938	-2.65256	0.00798843	0.294244	72014	Btbd17
53.9083	-1.01775	0.382766	-2.65894	0.00783867	0.290106	15368	Hmox1
67.9233	-1.02233	0.389372	-2.62559	0.00864986	0.301423	14704	Gng3
36.1894	-1.03091	0.381207	-2.70434	0.00684401	0.273192	231637	Ssh1
62.1626	-1.04489	0.282644	-3.69684	0.000218299	0.039465	99738	Kcnc4
94.011	-1.04632	0.361124	-2.89739	0.00376279	0.202603	329324	Syt14
93.1434	-1.04772	0.361318	-2.89972	0.0037349	0.202379	71805	Nup93
109.909	-1.05485	0.367502	-2.87032	0.00410057	0.213492	NA	Gm4477
43.4829	-1.05902	0.332908	-3.18111	0.00146714	0.133829	226830	Smyd2
171.023	-1.05923	0.348531	-3.03913	0.0023726	0.165278	104445	Cdc42ep1
67.8459	-1.08582	0.291823	-3.72081	0.000198581	0.0366595	NA	6430573F11Rik
62.9011	-1.08689	0.355715	-3.0555	0.00224685	0.162752	238328	Vash1
190.397	-1.09152	0.365164	-2.98912	0.00279786	0.180777	12889	Cplx1
93.2154	-1.10292	0.345718	-3.19023	0.00142161	0.13122	212632	Iffo2
59.0821	-1.10332	0.348897	-3.16231	0.00156524	0.13865	67896	Ccdc80
160.943	-1.1042	0.279224	-3.95452	7.66875e-05	0.0201558	212933	Pm20d1
265.383	-1.11079	0.389081	-2.85491	0.00430495	0.219595	24012	Rgs7
85.7083	-1.11194	0.318701	-3.48897	0.000484885	0.0689827	64143	Ralb
202.81	-1.12583	0.359067	-3.13544	0.00171595	0.144472	52389	Adgra1
170.343	-1.12747	0.322921	-3.49149	0.000480333	0.0689678	78257	Lrrc9
37.0665	-1.12773	0.342553	-3.29212	0.000994337	0.101442	52815	Ldhd
423.805	-1.12785	0.295196	-3.82067	0.00013309	0.0286221	56224	Tspan5
954.34	-1.12833	0.301853	-3.73803	0.000185469	0.035356	140579	Elmo2
136.014	-1.13033	0.400956	-2.8191	0.00481585	0.233373	26432	Plod2
79.899	-1.13622	0.414942	-2.73827	0.00617632	0.258855	320557	Fam169a
611.871	-1.14511	0.367462	-3.11627	0.00183155	0.146401	72225	1700003M07Rik
120.588	-1.14615	0.324862	-3.52812	0.000418524	0.06181	18131	Notch3
217.405	-1.15001	0.370554	-3.1035	0.00191248	0.151492	NA	Cml3
26.2658	-1.15527	0.344694	-3.35157	0.000803536	0.0903974	225288	Fhod3
166.16	-1.16042	0.320909	-3.61604	0.000299149	0.0478238	17309	Mgat3
80.1376	-1.17603	0.398845	-2.94858	0.00319238	0.190893	11810	Apobec1
220.914	-1.18311	0.409956	-2.88595	0.00390235	0.207239	238871	Pde4d
28.0941	-1.1845	0.405951	-2.91784	0.00352462	0.19803	20873	Plk4
218.662	-1.19049	0.432276	-2.75399	0.0058873	0.255518	14043	Ext2
39.296	-1.19946	0.39204	-3.05953	0.00221682	0.162752	16404	Itga7
97.5908	-1.20044	0.460777	-2.60526	0.00918059	0.308814	NA	Tmem35
54.7697	-1.20306	0.285378	-4.21566	2.49049e-05	0.00919524	384071	Slc25a34
387.603	-1.21001	0.405484	-2.9841	0.00284411	0.181635	353211	Prune2
37.7487	-1.2264	0.458892	-2.67252	0.00752849	0.285674	233067	Lrfn3
39.3731	-1.24303	0.395616	-3.14201	0.00167792	0.142623	73713	Rbm20
115.165	-1.24447	0.482595	-2.57871	0.00991687	0.321008	667370	Ifit3b
109.264	-1.25541	0.365529	-3.43452	0.000593614	0.0773544	14871	Gstt1
68.2136	-1.26669	0.370503	-3.41885	0.000628857	0.0796961	225742	St8sia5
30.2129	-1.27263	0.43247	-2.94269	0.00325372	0.192578	226610	Fam78b
33.1899	-1.2824	0.43261	-2.96434	0.00303331	0.18555	18088	Nkx2-2
65.4217	-1.28271	0.462727	-2.77208	0.00556995	0.248648	26559	Hunk
21.18	-1.29327	0.489233	-2.64347	0.00820608	0.296624	66399	Tsfm
21227.9	-1.2934	0.33638	-3.84507	0.000120517	0.026698	16513	Kcnj10
182.093	-1.29616	0.404451	-3.20475	0.00135181	0.128604	66240	Kcne1l
1250.91	-1.30809	0.501007	-2.61091	0.00903006	0.30693	227325	Dner
40.9254	-1.32481	0.42427	-3.12257	0.00179282	0.144827	231760	Rimbp2
62.0903	-1.33789	0.368619	-3.62946	0.000284018	0.0458778	11733	Ank1
327.232	-1.33835	0.459085	-2.91526	0.00355387	0.198952	74194	Rnd3
64.9268	-1.34086	0.439176	-3.05312	0.00226472	0.162752	100129	Gpr153
28.7381	-1.34321	0.502756	-2.67169	0.00754706	0.285674	241514	Zfp804a
37.6668	-1.35141	0.438484	-3.082	0.00205613	0.155534	70252	Jpx
89.9763	-1.36217	0.40671	-3.34925	0.000810295	0.0903974	227632	Kcnt1
228.558	-1.36416	0.441954	-3.08665	0.00202425	0.155534	244668	Sipa1l2
184.24	-1.3821	0.339572	-4.07014	4.69858e-05	0.0140117	230815	Man1c1
52.1717	-1.40209	0.337113	-4.15909	3.19517e-05	0.0110106	236904	Klhl15
31.5448	-1.40225	0.523372	-2.67926	0.00737847	0.285471	242126	Slc22a15
224.475	-1.4044	0.418159	-3.35854	0.000783561	0.0900051	215378	Brinp3
48.9283	-1.40903	0.38205	-3.68807	0.000225963	0.039503	208439	Klhl29
92.8575	-1.42443	0.467553	-3.04656	0.00231473	0.164504	329942	Csmd2
85.2292	-1.42944	0.312931	-4.56792	4.92577e-06	0.00318266	16504	Kcnc3
35.3085	-1.43677	0.476658	-3.01426	0.00257611	0.172661	20776	Tmie
24.8048	-1.45379	0.460192	-3.1591	0.00158258	0.13865	67842	Nop9
108.307	-1.46059	0.456933	-3.1965	0.00139105	0.129946	320827	C530008M17Rik
60.693	-1.46131	0.555029	-2.63286	0.00846686	0.30004	17174	Masp1
151.278	-1.46333	0.419976	-3.48432	0.000493393	0.0690882	103140	Gstt3
29.2799	-1.47305	0.529085	-2.78414	0.00536694	0.245327	15114	Hap1
233.248	-1.48141	0.435116	-3.40464	0.000662523	0.081524	22421	Wnt7a
261.573	-1.50009	0.512509	-2.92696	0.00342295	0.196602	20254	Scg2
71.0569	-1.51887	0.511171	-2.97135	0.00296491	0.183076	433022	Plcxd2
49.1868	-1.52169	0.580278	-2.62235	0.00873261	0.302156	66222	Serpinb1a
319.226	-1.52391	0.400327	-3.80666	0.000140858	0.0295174	207521	Dtx4
65.9094	-1.5365	0.434602	-3.53542	0.000407128	0.0612945	17965	Nbl1
48.33	-1.55289	0.472817	-3.28434	0.0010222	0.103603	171180	Syt12
326.968	-1.5581	0.469953	-3.31543	0.000915022	0.0958733	17263	Meg3
213.961	-1.56543	0.506292	-3.09195	0.00198844	0.154174	21960	Tnr
267.421	-1.58154	0.44818	-3.52879	0.000417459	0.06181	74513	Neto2
868.888	-1.60408	0.478771	-3.35041	0.000806907	0.0903974	242443	Grin3a
559.847	-1.63043	0.365249	-4.4639	8.04806e-06	0.00480005	117600	Srgap1
281.921	-1.63458	0.415493	-3.93407	8.35199e-05	0.0208894	319317	Snhg11
151.325	-1.63513	0.442384	-3.69618	0.000218868	0.039465	329252	Lgr6
134.94	-1.64078	0.472435	-3.47302	0.000514642	0.0706243	207181	Rbms3
144.623	-1.65051	0.374914	-4.40238	1.07072e-05	0.00535602	66733	Kcng4
13.5759	-1.65099	0.627699	-2.63023	0.00853276	0.30004	74637	Shpk
46.3092	-1.68546	0.561442	-3.00201	0.00268201	0.175798	104086	Cyp27a1
34.3751	-1.70293	0.511932	-3.32647	0.000879531	0.0945086	230837	Asap3
38.0143	-1.71935	0.604987	-2.84196	0.00448371	0.223566	56846	Necab3
141.453	-1.72174	0.607452	-2.83437	0.00459159	0.227482	269629	Lhfpl3
73.81	-1.7228	0.346578	-4.97088	6.66505e-07	0.000795038	15572	Elavl4
47.9531	-1.726	0.561488	-3.07398	0.00211223	0.158234	18574	Pde1b
33.4191	-1.73782	0.632597	-2.74712	0.00601215	0.257911	71864	Fam217a
53.2017	-1.73782	0.566841	-3.0658	0.00217089	0.161095	15460	Hr
291.634	-1.74247	0.594661	-2.93018	0.00338761	0.196602	18191	Nrxn3
17.3092	-1.75009	0.544567	-3.21373	0.00131024	0.125419	240063	Zfp811
14.206	-1.75685	0.588176	-2.98694	0.00281784	0.181312	74268	Aven
180.035	-1.77147	0.546056	-3.24412	0.00117813	0.116365	16502	Kcnc1
75.048	-1.7858	0.56072	-3.18483	0.00144837	0.132899	66066	Gng11
17.9932	-1.80898	0.689353	-2.62417	0.00868608	0.302007	217951	Tmem196
42.6249	-1.81963	0.663292	-2.74333	0.00608202	0.257911	381059	Gm1604b
19.8741	-1.83122	0.602835	-3.03767	0.00238411	0.165278	75209	Sv2c
27.504	-1.8349	0.631651	-2.90493	0.00367334	0.200735	NA	Rgag4
183.249	-1.85154	0.495592	-3.73601	0.00018696	0.035356	14417	Gad2
92.6078	-1.86076	0.657058	-2.83196	0.00462631	0.228329	96935	Susd4
46.5624	-1.86213	0.610265	-3.05135	0.00227813	0.162797	77015	Mpped2
351.744	-1.86355	0.676831	-2.75334	0.00589898	0.255518	19699	Reln
28.2001	-1.86553	0.560573	-3.32791	0.000875011	0.0945086	319352	Pianp
19.2486	-1.88061	0.619154	-3.03739	0.00238639	0.165278	76897	Ralyl
89.2938	-1.88183	0.657945	-2.86016	0.00423423	0.217418	NA	Lppr5
829.143	-1.89048	0.434775	-4.34818	1.37273e-05	0.00645059	114644	Slc13a3
12.1517	-1.89849	0.726586	-2.61289	0.00897803	0.305983	66176	Nat9
207.244	-1.90312	0.440264	-4.32268	1.54143e-05	0.00688781	226518	Nmnat2
21.4836	-1.90787	0.57083	-3.34227	0.000830966	0.0920414	67951	Tubb6
211.748	-1.91615	0.576713	-3.32254	0.000892022	0.0947437	14261	Fmo1
13746.8	-1.92643	0.487703	-3.95001	7.81465e-05	0.020197	243616	Slc6a11
41.8296	-1.94051	0.712315	-2.72423	0.00644518	0.263014	331461	Il1rapl1
75.895	-1.94496	0.590598	-3.29321	0.000990492	0.101442	171212	Galnt10
908.405	-1.94782	0.462025	-4.21583	2.48863e-05	0.00919524	233744	Spon1
32.8531	-1.95302	0.648106	-3.01342	0.00258318	0.172661	18783	Pla2g4a
15.1238	-1.97343	0.761118	-2.59281	0.00951963	0.314087	100313531	Nkx2-2os
25.4803	-1.9767	0.598392	-3.30335	0.000955374	0.0994295	76612	Lrrc27
22.4721	-1.98037	0.757312	-2.61499	0.00892293	0.305448	100504267	Trp53cor1
39.0236	-1.98244	0.449559	-4.40974	1.03495e-05	0.00534964	238271	Kcnh5
673.649	-1.98909	0.471299	-4.22044	2.43831e-05	0.00919524	14555	Gpd1
18.8973	-1.98984	0.47044	-4.22974	2.3396e-05	0.00919524	635253	Usp51
194.132	-1.99101	0.676575	-2.94278	0.00325282	0.192578	70546	Zdhhc2
212.953	-2.01092	0.642906	-3.12786	0.00176083	0.144472	18073	Nid1
12.2435	-2.03449	0.643801	-3.16013	0.00157699	0.13865	208836	Fanci
126.617	-2.03678	0.58202	-3.4995	0.000466136	0.06808	320452	P4ha3
19.0525	-2.06513	0.645716	-3.19819	0.00138292	0.129946	244723	Olfm2
27.3842	-2.1034	0.545944	-3.85278	0.000116783	0.0262456	217593	Slc25a21
46.3601	-2.1687	0.825303	-2.62777	0.00859477	0.301423	217682	Plekhd1
32.233	-2.16885	0.836351	-2.59323	0.0095078	0.314087	74199	Vit
10.2646	-2.19949	0.833993	-2.6373	0.00835691	0.299286	14178	Fgf7
77.9703	-2.24477	0.689522	-3.25554	0.00113175	0.112501	58178	Sorcs1
39.2067	-2.25347	0.602241	-3.74181	0.000182699	0.035356	NA	Fam19a1
151.669	-2.27896	0.601269	-3.79026	0.000150492	0.0311157	18516	Pbx3
51.0089	-2.28189	0.795134	-2.86982	0.00410707	0.213492	12362	Casp1
62.1794	-2.31193	0.476844	-4.8484	1.24462e-06	0.00107224	17268	Meis1
73.6543	-2.33243	0.852848	-2.73487	0.00624042	0.260786	216028	Lrrtm3
58.9594	-2.34926	0.687878	-3.41523	0.000637281	0.0796961	64706	Scube1
12.5784	-2.36611	0.852687	-2.77488	0.00552219	0.247493	239318	Plcxd3
66.0848	-2.37701	0.586166	-4.05518	5.00966e-05	0.0146575	54377	Cacng4
48.288	-2.37852	0.903896	-2.63141	0.00850318	0.30004	213262	Fstl5
88.3666	-2.40401	0.843161	-2.85118	0.00435568	0.220731	108151	Sema3d
38.2002	-2.44699	0.650912	-3.75932	0.000170375	0.0343117	11622	Ahr
25.7304	-2.45604	0.873935	-2.81032	0.00494916	0.236143	11489	Adam12
217.874	-2.47037	0.543593	-4.54452	5.50609e-06	0.00341532	56198	Heyl
674.756	-2.47059	0.390471	-6.32722	2.49612e-10	1.29025e-06	384061	Fndc5
21.259	-2.48023	0.736383	-3.36812	0.000756814	0.0875815	268755	Mir124a-1hg
11.2818	-2.48149	0.908676	-2.73089	0.00631639	0.260786	331424	C230004F18Rik
35.2684	-2.52779	0.42554	-5.9402	2.84681e-09	7.35758e-06	74053	Grip1
6.71677	-2.56803	0.975995	-2.63119	0.00850863	0.30004	545474	Scrt2
42.2545	-2.588	0.789521	-3.27793	0.00104569	0.105296	320495	Ipcef1
73.8885	-2.60764	0.835111	-3.12251	0.00179318	0.144827	18208	Ntn1
165.061	-2.62434	0.422778	-6.20737	5.38783e-10	1.67098e-06	50779	Rgs6
8.63703	-2.63118	0.930367	-2.82811	0.00468231	0.228329	14027	Evpl
67.7316	-2.63534	0.922525	-2.85666	0.00428124	0.219106	19277	Ptpro
28.0858	-2.636	0.945023	-2.78935	0.00528136	0.242302	94191	Adarb2
33.9304	-2.66104	0.721584	-3.68777	0.000226226	0.039503	54526	Syt10
129.626	-2.6848	0.828634	-3.24003	0.00119517	0.117301	14415	Gad1
52.9816	-2.69722	0.896482	-3.00867	0.00262397	0.173889	54612	Sfrp5
20.3105	-2.70483	0.950297	-2.8463	0.004423	0.223388	23921	Sh2b2
16.5486	-2.70836	1.01116	-2.67846	0.00739624	0.285471	12745	Clgn
2703.28	-2.71989	0.882127	-3.08334	0.00204694	0.155534	107831	Adgrb1
226.772	-2.72218	0.514908	-5.28673	1.24525e-07	0.0001931	12704	Cit
8.36823	-2.73932	1.05824	-2.58857	0.0096375	0.316493	192199	Rspo1
23.1013	-2.77355	0.952265	-2.91258	0.00358457	0.199949	12550	Cdh1
151.439	-2.80744	0.727926	-3.85676	0.000114899	0.0262456	11419	Asic1
21.5122	-2.81238	0.962366	-2.92236	0.00347385	0.196602	67606	Fibin
39.6885	-2.81637	0.613211	-4.59282	4.37306e-06	0.00308241	52850	Sgsm1
65.7125	-2.81937	0.697372	-4.04284	5.28069e-05	0.0151644	18053	Ngfr
12.6562	-2.8363	0.915019	-3.09972	0.00193706	0.151707	57441	Gmnn
5.68592	-2.83683	1.08445	-2.61592	0.00889875	0.305294	11682	Alk
48.0508	-2.84132	0.967732	-2.93606	0.00332406	0.195204	54524	Syt6
153.8	-2.85218	1.09911	-2.595	0.00945919	0.313427	14807	Grik3
15.8472	-2.94215	1.04605	-2.81263	0.00491376	0.235672	26934	Racgap1
37.4608	-3.02563	0.691184	-4.37746	1.20071e-05	0.00581856	114142	Foxp2
15.7504	-3.06705	1.07846	-2.84392	0.00445626	0.223566	381373	Sp9
48.0731	-3.10725	0.662108	-4.69297	2.69268e-06	0.00212229	16353	Ipw
9.86056	-3.12106	1.05076	-2.9703	0.00297512	0.183076	22029	Traf1
7.29061	-3.17078	0.939566	-3.37473	0.000738882	0.0861492	15466	Hrh2
195.213	-3.17916	0.688148	-4.61988	3.83964e-06	0.0028353	13640	Efna5
94.8362	-3.21831	1.101	-2.92308	0.00346587	0.196602	208748	Prrg3
6.42648	-3.22436	1.16039	-2.77868	0.00545804	0.245327	18383	Tnfrsf11b
185.179	-3.22725	0.73093	-4.41527	1.00884e-05	0.00534964	54710	Hs3st3b1
27.3791	-3.2608	1.04216	-3.12887	0.00175479	0.144472	66039	Tmem254a
16.9863	-3.26641	0.78198	-4.1771	2.95245e-05	0.0105256	268934	Grm4
112.795	-3.27613	1.07315	-3.05282	0.00226701	0.162752	13193	Dcx
19.8732	-3.28728	0.700969	-4.68961	2.7372e-06	0.00212229	320709	Tmem117
9.85545	-3.29891	1.17872	-2.79872	0.00513062	0.236787	12350	Car3
16.3369	-3.30597	1.14254	-2.89352	0.00380944	0.2037	12825	Col3a1
6.50091	-3.3433	1.22835	-2.72179	0.006493	0.263578	71924	Tube1
7.31585	-3.3639	1.12831	-2.98136	0.00286971	0.181635	13592	Ebf2
189.618	-3.41274	0.611664	-5.57943	2.41302e-08	5.34553e-05	237979	Sdk2
6.12008	-3.43324	1.2983	-2.64441	0.00818345	0.296624	100045469	Gm14204
12.7546	-3.44922	1.32253	-2.60805	0.00910595	0.307638	209837	Slc38a5
24.3513	-3.45389	0.868364	-3.97747	6.96527e-05	0.0186225	12308	Calb2
24.1051	-3.46786	0.896247	-3.86932	0.000109141	0.0260377	629147	Ctxn3
836.452	-3.47223	0.896948	-3.87116	0.000108318	0.0260377	14802	Gria4
9.50697	-3.49233	1.00883	-3.46177	0.000536638	0.0711252	18386	Oprd1
490.045	-3.49935	1.18711	-2.94778	0.00320063	0.190893	26968	Islr
41.3215	-3.62354	0.701518	-5.16528	2.40079e-07	0.000338446	18619	Penk
10.726	-3.62623	1.29407	-2.80218	0.00507584	0.23667	242506	Frmd3
4.76331	-3.63353	1.40942	-2.57803	0.00993641	0.321008	83762	Otof
25.4798	-3.63572	0.870937	-4.17449	2.98657e-05	0.0105256	241528	Lrrc55
12.8848	-3.74566	1.25594	-2.98235	0.00286042	0.181635	239096	Cdh24
40.8123	-3.80732	0.986165	-3.86073	0.000113048	0.0262456	100503592	A330076C08Rik
9.99753	-3.8237	1.20944	-3.16154	0.00156939	0.13865	70433	Draxin
6.41928	-3.85638	1.29639	-2.97469	0.00293282	0.182647	330998	Ankrd34c
4.90291	-3.97011	1.49511	-2.6554	0.00792142	0.29247	228778	6820408C15Rik
28.5659	-4.02872	0.753764	-5.3448	9.05152e-08	0.000155958	104010	Cdh22
11.5999	-4.08138	1.26096	-3.23671	0.00120916	0.117927	240726	Slco5a1
8.2157	-4.10433	1.33154	-3.08239	0.00205346	0.155534	71897	Lypd6b
19.9318	-4.12401	1.36306	-3.02555	0.00248179	0.168057	385354	Frmd7
35.1602	-4.15365	1.57417	-2.63862	0.00832441	0.298812	NA	Fam196b
15.5341	-4.17563	1.06751	-3.91155	9.17074e-05	0.0225731	109904	Mcf2
1775.92	-4.23227	0.619597	-6.83067	8.45165e-12	9.17457e-08	72555	Shisa9
5.98487	-4.31509	1.59436	-2.70647	0.00680023	0.272484	207618	Zfp804b
139.098	-4.41911	0.708304	-6.239	4.40365e-10	1.67098e-06	140723	Cacng5
5.98868	-4.42408	1.38575	-3.19256	0.00141018	0.130945	11595	Acan
43.2163	-4.42754	0.902054	-4.90829	9.18735e-07	0.000876366	246313	Prokr2
7.21234	-4.4338	1.48904	-2.97763	0.00290488	0.182385	72608	2700069I18Rik
3.88595	-4.52588	1.6483	-2.74579	0.00603652	0.257911	21646	Tcte2
7.0195	-4.53131	1.69132	-2.67916	0.00738066	0.285471	19207	Ptch2
7.28758	-4.54816	1.36781	-3.32515	0.000883713	0.0945086	195646	Hs3st2
3.67562	-4.58272	1.664	-2.75404	0.00588652	0.255518	106347	Ildr1
4.05548	-4.58637	1.6718	-2.74337	0.00608113	0.257911	245527	Eda2r
3.8471	-4.60571	1.64684	-2.79669	0.00516294	0.237572	68107	Cntd1
1.97506	-4.62451	1.65207	-2.79923	0.00512251	0.236787	78617	Cstad
12.2393	-4.62884	1.08257	-4.27581	1.90447e-05	0.0081481	627191	Syndig1l
3.7527	-4.63858	1.6873	-2.7491	0.00597583	0.257911	16369	Irs3
33.0209	-4.66253	1.05056	-4.43814	9.07415e-06	0.00521159	217143	Gpr179
4.11913	-4.78695	1.73443	-2.75995	0.00578096	0.254969	382077	Ccdc33
7.45786	-4.78833	1.49677	-3.1991	0.00137858	0.129946	218763	Lrrc3b
16.133	-4.84124	1.35838	-3.56398	0.000365278	0.0566437	12833	Col6a1
16.2157	-4.86446	1.32479	-3.67189	0.000240768	0.0410284	272636	Esyt3
9.08041	-4.88991	1.64223	-2.97761	0.00290508	0.182385	12404	Cbln1
2.35506	-4.91274	1.83168	-2.6821	0.00731617	0.285055	27220	Cartpt
4.78195	-4.97883	1.59105	-3.12928	0.00175238	0.144472	226654	Tstd1
4.79057	-4.99404	1.8534	-2.69452	0.00704894	0.277241	53857	Tuba8
13.4756	-5.06778	1.02648	-4.93705	7.93118e-07	0.000819926	272428	Acsm5
5.47604	-5.08821	1.86212	-2.73247	0.00628605	0.260786	23850	Pappa2
41.727	-5.09282	1.95569	-2.60411	0.00921124	0.309175	14765	Gpr50
5.21498	-5.12925	1.95644	-2.62173	0.00874857	0.302156	77798	A930009A15Rik
5.86245	-5.1543	1.99548	-2.58299	0.00979482	0.318424	23937	Mab21l2
5.50147	-5.16592	1.63765	-3.15447	0.00160793	0.139865	76628	1700112J16Rik
16.228	-5.17335	1.40305	-3.68722	0.000226721	0.039503	233836	Slc5a11
11.2296	-5.18529	1.20007	-4.32081	1.55461e-05	0.00688781	210719	Mkx
2.82289	-5.21552	1.79918	-2.89883	0.00374559	0.202379	320354	Grin1os
3.03852	-5.22073	1.8953	-2.75457	0.00587701	0.255518	16633	Klra2
3.11883	-5.31499	1.97383	-2.69272	0.00708712	0.277525	14685	Gnat1
3.12565	-5.33026	2.03921	-2.61388	0.00895203	0.305769	75833	4930532I03Rik
6.70483	-5.3958	2.01823	-2.67353	0.00750583	0.285674	15557	Htr1f
7.01781	-5.46463	1.90465	-2.8691	0.00411647	0.213492	13392	Dlx2
3.65375	-5.51232	1.54144	-3.57608	0.000348783	0.0546322	72269	Cda
15.2817	-5.54291	1.59246	-3.48073	0.000500058	0.0692357	78449	2700046A07Rik
3.86592	-5.56987	2.03187	-2.74125	0.00612054	0.257911	100504399	C130021I20Rik
3.86504	-5.64273	2.08689	-2.7039	0.00685313	0.273192	75369	4930563F08Rik
16.1341	-5.74004	1.61801	-3.54759	0.00038877	0.0591045	67473	Slc47a1
4.45483	-5.79847	1.98291	-2.92422	0.00345318	0.196602	18387	Oprk1
4.55423	-5.82732	2.07994	-2.80168	0.00508377	0.23667	380924	Olfm4
4.77019	-5.90968	1.90442	-3.10314	0.00191477	0.151492	403205	Agr3
4.8972	-5.94296	1.71645	-3.46237	0.000535447	0.0711252	216961	Coro6
5.22262	-6.01263	2.28493	-2.63143	0.00850271	0.30004	13599	Ecel1
5.22359	-6.0623	2.23144	-2.71677	0.00659222	0.266212	110834	Chrna3
5.25179	-6.06778	2.07607	-2.92273	0.00346975	0.196602	80797	Clca3a2
5.62976	-6.09836	1.48217	-4.11447	3.88063e-05	0.0120354	69665	Upk3bl
5.43807	-6.11354	2.01285	-3.03725	0.00238746	0.165278	75243	4930549C15Rik
5.70293	-6.13999	1.67599	-3.6635	0.000248797	0.0419358	13489	Drd2
5.52497	-6.14364	1.84019	-3.33858	0.000842075	0.0926103	240322	Adamts19
5.66813	-6.14685	1.96501	-3.12814	0.00175914	0.144472	13162	Slc6a3
5.848	-6.2251	2.01778	-3.08513	0.00203465	0.155534	16534	Kcnn4
12.078	-6.2325	1.27206	-4.89951	9.60742e-07	0.000876366	241159	Neu4
6.19632	-6.31264	2.01418	-3.1341	0.00172383	0.144472	65086	Lpar3
6.35911	-6.3479	1.96987	-3.2225	0.00127077	0.123161	71355	Col24a1
6.38406	-6.3544	1.9072	-3.3318	0.000862864	0.0942284	213945	Col28a1
126.849	-6.38167	2.45612	-2.59827	0.00936938	0.31202	12722	Clca3a1
6.5486	-6.39165	1.87062	-3.41686	0.000633483	0.0796961	74363	4931430N09Rik
6.92139	-6.46421	2.27189	-2.8453	0.00443693	0.223388	239852	Zpld1
14.3674	-6.49062	1.91434	-3.39053	0.000697577	0.0838552	17528	Mpz
7.22832	-6.49657	2.18278	-2.97628	0.00291764	0.182435	16371	Irx1
7.38178	-6.55801	1.9274	-3.40252	0.00066767	0.081524	13813	Eomes
15.7631	-6.63767	1.76532	-3.76003	0.000169893	0.0343117	60425	Doc2g
8.05556	-6.66934	1.66132	-4.01449	5.95754e-05	0.0164971	233038	Nccrp1
8.09948	-6.69775	1.84492	-3.63038	0.000283003	0.0458778	246049	Slc36a2
9.04512	-6.81483	1.9562	-3.4837	0.000494537	0.0690882	14654	Glra1
10.4561	-7.05746	2.07003	-3.40935	0.000651187	0.0807837	330096	Shisa3
10.9747	-7.11005	1.73622	-4.09513	4.21923e-05	0.0128289	628686	D030068K23Rik
14.3255	-7.50795	1.8875	-3.97772	6.95796e-05	0.0186225	15221	Foxd3
18.6161	-7.87591	2.8117	-2.80112	0.00509263	0.23667	16997	Ltbp2
72.9831	-8.81356	2.45499	-3.59006	0.000330603	0.0523129	320145	Sp8
42.8759	-9.07703	3.44767	-2.6328	0.00846834	0.30004	18378	Omp
50.2162	-9.30596	2.03514	-4.57264	4.81626e-06	0.00318266	100503859	1110015O18Rik
65.3771	-9.68678	2.27269	-4.26225	2.02378e-05	0.00825863	104271	Tex15
78.0533	-9.94094	2.92463	-3.39904	0.000676233	0.0819246	109272	Mybpc1
80.7948	-9.9892	2.68004	-3.72726	0.000193569	0.0361648	13142	Dao

## Sheet: CX_specific_DEGs
Supplementary Datasheet 1: log2 fold change and pvalue for all region-specific DEGs.
baseMean	log2FoldChange	lfcSE	stat	pvalue	padj	ExtrezID	GeneSymbol
3.08123	5.56806	1.75171	3.17864	0.00147968	0.113222	103142	Rdh9
12.5536	4.30445	0.886188	4.85727	1.19017e-06	0.000880346	64378	Gpr88
28.9766	3.89667	1.13925	3.42039	0.000625317	0.0746841	12971	Crym
4.06588	3.69303	1.31749	2.80307	0.00506184	0.192997	67666	Hapln3
231.319	3.55873	0.571973	6.22185	4.91315e-10	2.66505e-06	12319	Car8
8.2157	3.44257	1.101	3.12678	0.00176735	0.12614	71897	Lypd6b
53.445	3.4044	0.696875	4.88524	1.03302e-06	0.000800496	19892	Rpe65
25.9743	3.26596	0.875691	3.72958	0.000191796	0.0390137	21375	Tbr1
15.0393	2.99672	1.04359	2.87154	0.00408483	0.183319	64929	Scel
22.228	2.87322	0.932926	3.07979	0.00207147	0.135746	242702	Myom3
32.4527	2.85902	0.656734	4.35339	1.34046e-05	0.0060397	75141	Rasd2
10.7188	2.82713	0.92278	3.06371	0.00218614	0.137418	242662	Rims3
8.30141	2.78203	0.978565	2.84297	0.00446951	0.186628	20907	Stx1a
9.02786	2.57765	0.955067	2.69892	0.00695643	0.221098	269120	Optc
44.8001	2.55	0.687242	3.71049	0.000206862	0.0399192	56312	Nupr1
18.9093	2.50128	0.967572	2.58511	0.00973479	0.255416	626275	A930012L18Rik
21.7897	2.44577	0.716325	3.41434	0.000639373	0.0748527	71995	Erv3
374.68	2.4433	0.486241	5.02488	5.03759e-07	0.000512354	14585	Gfra1
87.4874	2.36313	0.773518	3.05504	0.00225033	0.139187	16774	Lama3
8.8417	2.33059	0.895147	2.60358	0.00922552	0.251048	664987	Gm14393
30.8962	2.30203	0.631895	3.64306	0.000269419	0.0458447	18667	Pgr
42.4431	2.28106	0.852453	2.67587	0.00745345	0.226287	210622	Pamr1
403.598	2.17422	0.592404	3.67017	0.000242394	0.0438275	216049	Zfp365
436.729	2.11705	0.645944	3.27746	0.00104746	0.0950772	320343	Lypd6
218.273	2.06284	0.767878	2.68642	0.00722221	0.224717	270190	Ephb1
536.03	2.01843	0.394935	5.11079	3.20815e-07	0.000435052	14221	Fjx1
22.0541	2.00068	0.703609	2.84345	0.00446282	0.186628	212712	Satb2
467.705	1.94978	0.441503	4.41624	1.00435e-05	0.00495264	101351	Eogt
65.3106	1.85664	0.685454	2.70863	0.00675606	0.219714	244579	Tox3
2291.98	1.83109	0.652076	2.8081	0.0049835	0.191717	108069	Grm3
39.4777	1.80086	0.498174	3.61492	0.00030044	0.0484066	211323	Nrg1
232.91	1.77667	0.676991	2.62436	0.00868119	0.244672	214931	Fbxl16
609.927	1.74008	0.540911	3.21694	0.00129567	0.108683	20377	Sfrp1
685.89	1.73941	0.603408	2.88264	0.00394354	0.179866	242425	Gabbr2
38.7499	1.73232	0.432557	4.00484	6.20607e-05	0.0198022	22685	Zfp239
33.2431	1.7032	0.632054	2.6947	0.00704511	0.22348	230868	Igsf21
70.96	1.69486	0.615736	2.75258	0.00591269	0.207949	233071	Arhgap33
81.7296	1.64486	0.61155	2.68965	0.00715268	0.224073	242667	Dlgap3
947.077	1.63996	0.580602	2.82459	0.00473408	0.189767	58175	Rgs20
35.8969	1.6258	0.629146	2.58413	0.0097625	0.255416	104886	Rab15
87.3645	1.62003	0.622855	2.60098	0.00929574	0.252116	76487	Ppp1r3g
75.6834	1.61359	0.587586	2.74613	0.00603024	0.208344	330941	AI593442
133.82	1.60559	0.514255	3.12217	0.00179524	0.126467	107522	Ece2
96.091	1.56243	0.330243	4.73116	2.23245e-06	0.00139726	75216	Cep128
17.0932	1.55734	0.544199	2.8617	0.00421371	0.184691	100087	Kti12
19.7726	1.54711	0.518126	2.98597	0.00282677	0.154629	118453	Mmp28
674.948	1.53694	0.475555	3.23188	0.00122977	0.106522	23888	Gpc6
432.244	1.52993	0.514942	2.97107	0.00296768	0.158544	75607	Wnk2
2482.65	1.455	0.287702	5.05731	4.25202e-07	0.00048508	66259	Camk2n1
326.097	1.41322	0.270788	5.21891	1.7998e-07	0.000325423	73102	Slc22a23
608.203	1.39054	0.408756	3.40189	0.00066921	0.0766906	12890	Cplx2
123.444	1.38452	0.528492	2.61975	0.00879944	0.246037	16581	Kifc2
64.7528	1.36831	0.472526	2.89574	0.00378271	0.17935	21983	Tpbg
49.4217	1.36593	0.510425	2.67606	0.00744929	0.226287	12570	Cdk5r2
44.3936	1.36512	0.38613	3.53539	0.000407169	0.0566515	13170	Dbp
22.8598	1.35987	0.449633	3.02439	0.00249132	0.146322	100041231	Gm3219
7899.06	1.35983	0.413561	3.28809	0.00100868	0.094208	20255	Scg3
61.9217	1.33064	0.482702	2.75664	0.00583986	0.206838	NA	6030419C18Rik
95.1384	1.31825	0.363986	3.62171	0.000292666	0.0481065	320685	Dctd
72.8538	1.3113	0.487258	2.69119	0.00711974	0.224073	11838	Arc
3620	1.28524	0.354331	3.62722	0.000286487	0.0475714	13609	S1pr1
52.7834	1.28413	0.415861	3.08788	0.0020159	0.134999	228966	Ppp1r3d
27.3666	1.28046	0.432034	2.96379	0.00303874	0.160031	224640	Lemd2
95.6526	1.26056	0.479141	2.63089	0.00851626	0.241859	66375	Dhrs7
518.749	1.2551	0.483156	2.59771	0.00938472	0.253263	99470	Magi3
2692.51	1.25361	0.474926	2.63958	0.00830082	0.238656	54393	Gabbr1
51.2571	1.2407	0.43867	2.82833	0.00467914	0.189412	66934	Dsn1
265.383	1.24019	0.412663	3.00534	0.00265288	0.152545	24012	Rgs7
268.395	1.23359	0.360692	3.42005	0.000626097	0.0746841	14708	Gng7
47.5782	1.20293	0.348689	3.44988	0.000560843	0.068109	NA	5330426P16Rik
72.9089	1.19823	0.411943	2.90874	0.00362888	0.175872	23984	Pde10a
94.0905	1.18839	0.458877	2.58978	0.00960362	0.255416	378431	Txlnb
589.796	1.18159	0.332409	3.55462	0.000378525	0.0560747	23859	Dlg2
4654.79	1.1757	0.423198	2.77814	0.00546718	0.199032	225998	Rorb
1732.02	1.16295	0.408814	2.84468	0.00444557	0.186628	14701	Gng12
1254.13	1.15593	0.341903	3.38089	0.000722523	0.0794433	29820	Tnfrsf19
307.98	1.13481	0.38783	2.92606	0.00343281	0.169279	76969	Chst1
811.211	1.13448	0.415205	2.73233	0.00628872	0.214072	14634	Gli3
805.258	1.1163	0.423586	2.63537	0.00840463	0.240078	16525	Kcnk1
721.116	1.10239	0.297379	3.70701	0.000209721	0.0399192	66234	Msmo1
159.066	1.10227	0.346185	3.18406	0.00145224	0.113073	652925	Tmem243
806.659	1.09979	0.390735	2.81467	0.00488274	0.191002	30878	Apln
32.5696	1.09322	0.382102	2.86108	0.00422207	0.184691	16506	Kcnd1
90.237	1.08496	0.345662	3.1388	0.0016964	0.123791	107503	Atf5
844.888	1.07558	0.398481	2.69919	0.00695087	0.221098	210044	Adcy2
165.737	1.06868	0.388278	2.75237	0.00591658	0.207949	22360	Nrsn1
61.0431	1.03971	0.325393	3.19525	0.0013971	0.111786	73739	Cby1
95.3347	1.02813	0.2737	3.75642	0.000172361	0.0355041	71147	Oxsm
85.6288	1.02753	0.378099	2.71763	0.00657514	0.217033	19401	Rara
920.39	1.02174	0.332104	3.07657	0.002094	0.135746	57266	Cxcl14
1988.82	1.01964	0.360281	2.83014	0.00465281	0.188816	218952	Fermt2
270.547	1.00683	0.283886	3.54659	0.000390251	0.0565	67053	Rpp14
730.534	1.00617	0.324921	3.09667	0.00195706	0.133812	16423	Cd47
43.2923	1.00533	0.373485	2.69174	0.00710801	0.224073	244329	Mcph1
998.099	1.00044	0.274689	3.64207	0.000270453	0.0458447	14137	Fdft1
316.578	0.998384	0.349176	2.85926	0.00424632	0.184691	NA	2900011O08Rik
635.487	0.9978	0.33972	2.93713	0.00331269	0.168461	11652	Akt2
165.894	0.992563	0.301227	3.29506	0.000983997	0.0940321	15490	Hsd17b7
86.0296	0.974598	0.273371	3.56511	0.000363704	0.0553136	56325	Abcb9
109.009	0.973754	0.343106	2.83805	0.00453894	0.187945	71816	Rnf180
48.1393	0.965155	0.370667	2.60383	0.00921875	0.251048	56314	Zfp113
186.735	0.958731	0.298826	3.20832	0.00133512	0.110849	75475	Oplah
217.975	0.956954	0.265356	3.6063	0.000310599	0.0495527	209497	Tmem164
171.467	0.956263	0.274891	3.4787	0.000503844	0.0629088	66569	Gdpd1
218.529	0.937859	0.314073	2.98612	0.00282541	0.154629	53330	Vamp4
973.802	0.936822	0.287838	3.25468	0.0011352	0.101501	56409	Nudt3
727.965	0.931581	0.322745	2.88643	0.00389637	0.179844	74189	Phactr3
863.113	0.926138	0.334029	2.77263	0.00556051	0.201528	81840	Sorcs2
55.6431	0.925659	0.347457	2.66409	0.00771962	0.230076	327951	Cyb5d1
680.492	0.91944	0.352511	2.60826	0.00910037	0.250153	67252	Cap2
1223.12	0.917724	0.352271	2.60516	0.0091831	0.251048	14405	Gabrg1
1514.13	0.911744	0.329859	2.76404	0.00570906	0.205539	12804	Cntfr
1882.29	0.906389	0.331003	2.73831	0.00617561	0.212016	17532	Mras
144.195	0.899943	0.291366	3.08871	0.00201031	0.134999	76505	1500009C09Rik
72.2937	0.886949	0.33587	2.64076	0.00827215	0.238431	66455	Cnpy4
628.723	0.886297	0.202474	4.37734	1.20139e-05	0.00558577	67739	Slc48a1
71.7671	0.877932	0.324381	2.70648	0.00680001	0.219993	19364	Rad51d
316.107	0.873403	0.316165	2.76249	0.00573617	0.205605	66058	Tmem176a
1060.46	0.859748	0.325357	2.64247	0.00823031	0.238431	13649	Egfr
198.524	0.832839	0.293906	2.83369	0.00460145	0.188816	73284	Ddit4l
540.039	0.831936	0.264864	3.14099	0.00168377	0.123791	NA	Clcn4-2
338.315	0.830877	0.248151	3.34827	0.000813187	0.0842865	223601	Fam49b
454.676	0.830446	0.264072	3.14477	0.00166217	0.123509	16987	Lss
1161.21	0.820508	0.220357	3.72355	0.000196445	0.0392266	236915	Arhgef9
112.359	0.816273	0.269633	3.02734	0.00246715	0.146322	56873	Lmbr1
85.7252	0.809821	0.24669	3.28275	0.00102799	0.0945113	629378	Dact3
509.123	0.800896	0.267847	2.99013	0.00278861	0.15435	17191	Mbd2
2729.14	0.796667	0.285207	2.7933	0.00521734	0.195621	19122	Prnp
972.762	0.783358	0.253678	3.088	0.00201506	0.134999	NA	AI464131
669.076	0.778228	0.257063	3.02739	0.00246679	0.146322	11518	Add1
2948.01	0.774798	0.258991	2.99161	0.00277515	0.154129	216739	Acsl6
225.097	0.774312	0.292294	2.64908	0.00807107	0.236224	11777	Ap3s1
457.337	0.773854	0.250544	3.08869	0.00201041	0.134999	57754	Cend1
528.606	0.771443	0.197253	3.91093	9.19401e-05	0.0249357	18645	Pfn2
567.528	0.760964	0.232372	3.27476	0.00105752	0.0950772	68675	Fam172a
401.737	0.758032	0.255709	2.96443	0.00303242	0.160031	18858	Pmp22
1359.52	0.755489	0.275569	2.74156	0.00611484	0.210374	320840	Negr1
204.302	0.751793	0.281702	2.66875	0.00761333	0.229168	72750	Fam117b
233.135	0.750542	0.28773	2.6085	0.0090941	0.250153	52064	Coq5
184.51	-0.753016	0.28289	-2.66186	0.00777095	0.23076	26401	Map3k1
135.311	-0.758264	0.283217	-2.67733	0.00742121	0.226287	12305	Ddr1
140.633	-0.764339	0.260138	-2.93821	0.00330114	0.168461	14368	Fzd6
150.935	-0.76827	0.275904	-2.78456	0.00536009	0.197341	13929	Amz2
177.8	-0.778834	0.26571	-2.93114	0.0033772	0.168709	68021	Bphl
140.557	-0.793351	0.289216	-2.74311	0.00608607	0.209828	59003	Maea
133.521	-0.807823	0.313116	-2.57995	0.00988154	0.257696	67581	Tbc1d23
182.347	-0.818734	0.296547	-2.76089	0.00576447	0.205757	68098	Rchy1
178.837	-0.822251	0.30327	-2.71128	0.0067024	0.219453	66646	Rpe
93.9495	-0.824415	0.304428	-2.70808	0.00676745	0.219714	26384	Gnpda1
665.889	-0.85028	0.302705	-2.80894	0.00497052	0.191671	18263	Odc1
110.154	-0.878673	0.272019	-3.23019	0.0012371	0.106522	319179	Hist1h2be
691.17	-0.897739	0.303266	-2.96024	0.00307398	0.161081	56386	B4galt6
153.92	-0.902241	0.298219	-3.02543	0.00248279	0.146322	70428	Polr3b
63.1244	-0.907496	0.343631	-2.6409	0.00826856	0.238431	66181	Nop10
78.1638	-0.910522	0.342336	-2.65973	0.00782034	0.231382	223453	Dap
550.878	-0.921161	0.306486	-3.00556	0.00265092	0.152545	234214	Sorbs2
549.601	-0.929637	0.336997	-2.75859	0.00580516	0.206261	50770	Atp11a
106.764	-0.958238	0.33675	-2.84555	0.00443352	0.186628	14894	Cfap20
117.132	-0.959067	0.365847	-2.6215	0.00875439	0.245198	99031	Osbpl6
96.6225	-0.966202	0.373714	-2.58541	0.00972641	0.255416	319236	Trim12c
587.493	-0.969951	0.351344	-2.76069	0.00576797	0.205757	18750	Prkca
645.001	-0.985052	0.25661	-3.83871	0.000123682	0.0304241	226525	Rasal2
903.28	-0.989851	0.338075	-2.92791	0.0034125	0.168789	71207	Nudt4
83.6456	-1.01025	0.367638	-2.74796	0.0059968	0.208339	240041	Zfp945
2314.04	-1.01807	0.300719	-3.38544	0.000710633	0.0792064	11820	App
206.975	-1.03535	0.303833	-3.40764	0.000655264	0.0756249	226442	Zfp281
289.804	-1.03849	0.307114	-3.38146	0.000721027	0.0794433	243362	Stard13
141.402	-1.04423	0.394125	-2.6495	0.00806113	0.236224	11746	Anxa4
866.289	-1.05494	0.399759	-2.63894	0.00831657	0.238687	15259	Hipk3
90.6015	-1.05615	0.36609	-2.88495	0.00391478	0.179844	227700	Sh3glb2
100.189	-1.06154	0.374578	-2.83397	0.00459741	0.188816	NA	Itfg3
44.117	-1.07736	0.402494	-2.6767	0.0074351	0.226287	66126	Elof1
87.9475	-1.08433	0.352627	-3.07499	0.00210506	0.135746	235527	Plscr4
113.596	-1.08571	0.406687	-2.66964	0.00759318	0.229168	56706	Ccnl1
98.4991	-1.08989	0.390491	-2.79108	0.00525327	0.195621	27204	Syn3
181.376	-1.09385	0.408928	-2.67491	0.00747489	0.226516	54003	Nell2
94.8581	-1.09724	0.35867	-3.05919	0.00221934	0.138373	75869	Arl5b
104.472	-1.1083	0.375264	-2.95338	0.00314311	0.162891	NA	Wbp5
225.575	-1.12156	0.380975	-2.94391	0.00324092	0.166371	50780	Rgs3
559.215	-1.12576	0.427863	-2.63113	0.0085101	0.241859	105445	Dock9
1043.23	-1.14062	0.32676	-3.49069	0.000481768	0.0617308	66395	Ahnak
394.073	-1.14683	0.397151	-2.88765	0.00388126	0.179844	26878	B3galt2
3131.05	-1.15307	0.306424	-3.76298	0.0001679	0.03528	74340	Ahcyl2
307.486	-1.1539	0.400069	-2.88426	0.00392334	0.179844	108071	Grm5
132.905	-1.17225	0.348035	-3.36821	0.000756587	0.0804702	15446	Hpgd
2497.32	-1.17594	0.453715	-2.59179	0.00954774	0.255124	17755	Map1b
89.4587	-1.18351	0.360249	-3.28525	0.0010189	0.094208	67016	Tbc1d2b
770.046	-1.1877	0.425393	-2.79201	0.0052382	0.195621	13132	Dab2
50.8099	-1.19126	0.427133	-2.78897	0.00528766	0.196005	268749	Rnf31
188.934	-1.19137	0.38647	-3.0827	0.00205135	0.135746	56353	Rybp
83.6532	-1.20622	0.446281	-2.70283	0.00687527	0.220458	18033	Nfkb1
157.981	-1.20711	0.421118	-2.86644	0.00415118	0.184303	15530	Hspg2
443.601	-1.22682	0.472375	-2.59713	0.00940064	0.253272	16508	Kcnd2
435.459	-1.22829	0.298686	-4.11232	3.91704e-05	0.0155468	320472	Ppm1e
272.129	-1.23592	0.345	-3.58236	0.000340498	0.0532782	233335	Synm
81.6118	-1.23645	0.440827	-2.80484	0.00503409	0.192752	80876	Ifitm2
1231.47	-1.25698	0.483851	-2.59787	0.00938034	0.253263	17118	Marcks
143.973	-1.27938	0.412889	-3.09861	0.00194429	0.1335	117606	Boc
78.0774	-1.28547	0.382762	-3.35839	0.000783971	0.0823068	74552	Nipal3
378.84	-1.28582	0.336473	-3.82145	0.000132667	0.0317484	11819	Nr2f2
551.367	-1.29173	0.392294	-3.29275	0.000992136	0.0940321	109624	Cald1
80.1885	-1.29221	0.458193	-2.82023	0.00479898	0.190758	18605	Enpp1
504.093	-1.2923	0.432965	-2.98476	0.00283801	0.154629	67760	Slc38a2
460.548	-1.2935	0.357736	-3.61581	0.000299414	0.0484066	210293	Dock10
95.9106	-1.30245	0.427017	-3.05011	0.00228758	0.139423	74761	Mxra8
159.003	-1.3049	0.381816	-3.41761	0.000631741	0.0746841	NA	Fam134b
349.348	-1.31002	0.456763	-2.86805	0.00413012	0.184303	52668	Ifi27
693.904	-1.31679	0.454682	-2.89608	0.00377861	0.17935	14745	Lpar1
220.335	-1.31906	0.323815	-4.07351	4.63096e-05	0.0175255	71586	Ifih1
38.4996	-1.32243	0.468964	-2.81991	0.00480377	0.190758	235050	Zfp810
111.499	-1.32744	0.472328	-2.81042	0.00494767	0.191671	13713	Elk3
510.154	-1.34204	0.473988	-2.83139	0.00463466	0.188816	11977	Atp7a
108.698	-1.34345	0.331526	-4.05231	5.07146e-05	0.0178728	56036	Ccnl2
50.4163	-1.35564	0.480428	-2.82173	0.0047765	0.190758	103213	Traf3ip2
99.2662	-1.35582	0.304156	-4.45766	8.28579e-06	0.00449502	224897	Dpp9
86.0304	-1.35928	0.507867	-2.67645	0.00744064	0.226287	227696	Phyhd1
98.4365	-1.36081	0.507664	-2.68053	0.00735065	0.226243	18828	Plscr2
129.825	-1.36409	0.51629	-2.6421	0.00823929	0.238431	236900	Pdk3
211.192	-1.36431	0.479037	-2.84803	0.00439914	0.186425	12747	Clk1
377.249	-1.36996	0.437847	-3.12886	0.00175485	0.1258	108012	Ap1s2
50.2466	-1.37676	0.511701	-2.69056	0.00713314	0.224073	14696	Gnb4
191.072	-1.39448	0.394232	-3.53722	0.000404369	0.0566515	74464	Zswim5
102.575	-1.39926	0.541098	-2.58597	0.00971066	0.255416	75646	Rai14
60.699	-1.40109	0.476917	-2.9378	0.00330552	0.168461	244548	Elmod2
189.281	-1.40634	0.42791	-3.28653	0.00101432	0.094208	52552	Parp8
388.221	-1.41007	0.449206	-3.13902	0.00169512	0.123791	20482	Skil
171.928	-1.42787	0.535218	-2.66783	0.00763425	0.229168	227058	Dnah7b
256.103	-1.43854	0.530399	-2.71217	0.00668435	0.219303	16485	Kcna1
152.243	-1.44049	0.431109	-3.34135	0.000833727	0.0858686	230073	Ddx58
182.89	-1.44431	0.528481	-2.73295	0.00627697	0.214072	20650	Sntb2
73.7822	-1.45681	0.45107	-3.22967	0.00123935	0.106522	53885	Nphp1
111.03	-1.45792	0.551602	-2.64307	0.00821569	0.238431	18125	Nos1
712.164	-1.45996	0.439633	-3.32086	0.000897413	0.0895423	214459	Fnbp1l
59.4852	-1.47865	0.46151	-3.20394	0.00135561	0.110853	76281	Tax1bp3
38.9867	-1.48084	0.561401	-2.63777	0.00834539	0.239093	60364	Donson
45.7715	-1.48787	0.504373	-2.94994	0.00317833	0.164194	20509	Slc19a1
424.902	-1.48988	0.477187	-3.12222	0.00179496	0.126467	20541	Slc8a1
183.146	-1.49378	0.397157	-3.76119	0.000169105	0.03528	14266	Aff2
41.828	-1.49381	0.517123	-2.88868	0.00386858	0.179844	101100	Ttll3
73.7693	-1.51766	0.56383	-2.69171	0.00710876	0.224073	20454	St3gal5
696.277	-1.51823	0.37797	-4.0168	5.89928e-05	0.0195324	12494	Cd38
67.1332	-1.52916	0.499744	-3.05988	0.00221423	0.138373	638247	9530082P21Rik
93.7162	-1.53087	0.418214	-3.66049	0.000251733	0.0445266	68318	Aph1c
723.626	-1.53248	0.532453	-2.87815	0.00400019	0.181323	12661	Chl1
33.6948	-1.54644	0.595889	-2.59518	0.00945412	0.254292	213402	Armc2
43.2273	-1.55158	0.569899	-2.72255	0.00647804	0.216348	545622	Ptpn3
63.5687	-1.56408	0.577528	-2.70823	0.00676437	0.219714	71436	Flrt3
456.322	-1.56432	0.412346	-3.7937	0.000148418	0.0322028	53881	Slc5a3
159.255	-1.5658	0.385565	-4.06107	4.88493e-05	0.017665	20723	Serpinb9
235.399	-1.56896	0.447374	-3.50705	0.000453107	0.0599465	208177	Phldb2
96.6438	-1.57645	0.552454	-2.85354	0.00432352	0.185222	15958	Ifit2
60.7407	-1.58962	0.578031	-2.75005	0.00595854	0.208159	320712	Abi3bp
489.709	-1.61591	0.473628	-3.41178	0.000645397	0.0750182	105727	Slc38a1
141.839	-1.62518	0.560864	-2.89765	0.00375976	0.17935	19735	Rgs2
162.783	-1.62623	0.528447	-3.07737	0.00208834	0.135746	11514	Adcy8
197.492	-1.62989	0.458479	-3.55499	0.000377993	0.0560747	NA	Epb4.1l3
36.935	-1.64012	0.614953	-2.66706	0.0076518	0.229168	22774	Zic4
121.753	-1.64148	0.627358	-2.6165	0.00888357	0.247538	78889	Wsb1
63.8693	-1.66175	0.57999	-2.86513	0.00416836	0.184303	216560	Wdpcp
108.777	-1.66186	0.549368	-3.02505	0.00248594	0.146322	52250	Reep1
40.925	-1.66384	0.546191	-3.04626	0.0023171	0.140435	218820	Zfp503
252.967	-1.68091	0.389177	-4.31914	1.5664e-05	0.00653592	11600	Angpt1
51.2607	-1.69642	0.530267	-3.19918	0.00137821	0.111471	22061	Trp63
25.7356	-1.70392	0.585849	-2.90846	0.00363214	0.175872	17874	Myd88
108.573	-1.70937	0.610245	-2.80112	0.00509257	0.193173	209086	Samd9l
38.0395	-1.72049	0.587569	-2.92815	0.00340983	0.168789	66922	Rras2
211.355	-1.75086	0.541642	-3.2325	0.00122714	0.106522	22771	Zic1
38.7126	-1.75723	0.62048	-2.83204	0.00462517	0.188816	66196	Myo19
34.0467	-1.77365	0.621194	-2.85522	0.00430069	0.185146	83436	Plekha2
147.274	-1.77383	0.501748	-3.5353	0.000407314	0.0566515	209039	Tns2
28.0046	-1.77405	0.595554	-2.97882	0.00289363	0.156439	NA	Gm17296
144.983	-1.777	0.683027	-2.60165	0.00927763	0.252045	12870	Cp
108.966	-1.77831	0.66687	-2.66666	0.00766101	0.229168	338370	Nalcn
38.9989	-1.78811	0.632801	-2.8257	0.00471775	0.189767	66433	Chchd7
185.884	-1.78816	0.482078	-3.70927	0.000207857	0.0399192	234515	Inpp4b
199.243	-1.79305	0.603686	-2.97017	0.00297635	0.158544	432450	Nkain2
72.6559	-1.81333	0.683885	-2.65152	0.00801312	0.235375	100039796	Tgtp2
87.4957	-1.81476	0.53844	-3.37041	0.00075056	0.0804702	68169	Ndnf
104.858	-1.82344	0.521108	-3.49916	0.000466732	0.060761	59093	Pcbp3
123.814	-1.82593	0.699984	-2.60853	0.00909329	0.250153	20442	St3gal1
80.0035	-1.82921	0.451861	-4.04817	5.16206e-05	0.0178728	242864	Napepld
56.4253	-1.83619	0.704477	-2.60646	0.00914845	0.250627	625018	C4a
51.0408	-1.84467	0.465044	-3.96665	7.28897e-05	0.0215661	78925	Srd5a1
168.102	-1.84797	0.588322	-3.14109	0.00168318	0.123791	18197	Nsg2
281.042	-1.848	0.646275	-2.85946	0.00424369	0.184691	13869	Erbb4
140.991	-1.85884	0.550642	-3.37577	0.000736106	0.0798577	71785	Pdgfd
33.5064	-1.87667	0.584192	-3.21242	0.00131621	0.10984	18082	Nipsnap1
80.5376	-1.88543	0.700773	-2.6905	0.0071345	0.224073	237988	Cdr2l
204.832	-1.88652	0.697628	-2.70419	0.00684707	0.220458	13483	Dpp6
68.2627	-1.88786	0.552503	-3.41692	0.000633344	0.0746841	74646	Spsb1
61.2673	-1.896	0.735947	-2.57628	0.00998697	0.257976	67569	Mgat4c
22.1047	-1.89665	0.656123	-2.8907	0.00384388	0.17935	30843	Fbxl12
1022.58	-1.90857	0.469335	-4.06653	4.77173e-05	0.0176478	74055	Plce1
30.1975	-1.91313	0.738943	-2.58901	0.00962528	0.255416	211961	Asxl3
598.165	-1.91429	0.576331	-3.32151	0.000895316	0.0895423	66425	Pcp4l1
182.201	-1.91797	0.628678	-3.0508	0.00228235	0.139423	66141	Ifitm3
685.222	-1.92081	0.577809	-3.3243	0.000886412	0.0895423	22228	Ucp2
82.9316	-1.92423	0.643935	-2.98823	0.00280596	0.154629	74596	Cds1
277.728	-1.93352	0.677616	-2.85341	0.00432523	0.185222	68813	Dock5
38.524	-1.93874	0.738158	-2.62646	0.0086279	0.243902	72140	Cep89
35.9875	-1.94437	0.713981	-2.72328	0.00646372	0.216348	69550	Bst2
25.7193	-1.95115	0.742943	-2.62625	0.00863317	0.243902	70355	Gprc5c
224.79	-1.95994	0.64987	-3.01589	0.00256225	0.149446	NA	Fam84b
163.572	-1.97271	0.685926	-2.87598	0.00402773	0.182065	212531	Sh3bgrl2
258.159	-1.97605	0.675864	-2.92374	0.00345855	0.169302	83397	Akap12
56.428	-1.98133	0.725647	-2.73043	0.00632521	0.214072	226041	Pgm5
82.7834	-1.98147	0.699822	-2.83139	0.00463457	0.188816	380660	Acss3
281.241	-1.98692	0.448571	-4.42944	9.44769e-06	0.00495264	NA	Lppr4
323.419	-1.99526	0.407246	-4.89941	9.61249e-07	0.00078212	330267	Thsd7a
21.5785	-2.01726	0.718809	-2.80639	0.00500999	0.192282	69772	Bdh2
14.2821	-2.04424	0.784271	-2.60655	0.00914605	0.250627	76375	Det1
56.0163	-2.05015	0.758436	-2.70312	0.00686911	0.220458	207596	Thsd4
17.6186	-2.06568	0.722736	-2.85813	0.00426144	0.184691	67795	Rnls
72.9763	-2.07712	0.653783	-3.17708	0.00148764	0.113222	24056	Sh3bp5
171.925	-2.07945	0.641482	-3.24164	0.00118844	0.105106	12380	Cast
71.5778	-2.0965	0.63657	-3.29343	0.000989714	0.0940321	76142	Ppp1r14c
117.42	-2.11489	0.645657	-3.27556	0.00105452	0.0950772	50786	Hs6st2
18.3389	-2.11637	0.798017	-2.65203	0.00800091	0.235375	320679	Samd12
58.1289	-2.11985	0.740309	-2.86347	0.00419029	0.184303	16511	Kcnh2
427.133	-2.13193	0.748296	-2.84905	0.00438497	0.18631	74559	Elovl7
57.4541	-2.14584	0.604682	-3.54871	0.000387123	0.0565	232670	Tspan33
70.9961	-2.16828	0.814901	-2.66079	0.00779583	0.231078	16775	Lama4
170.33	-2.17455	0.804391	-2.70335	0.00686448	0.220458	20716	Serpina3n
43.979	-2.18705	0.713889	-3.06357	0.00218714	0.137418	74186	Ccdc3
38.305	-2.19295	0.718089	-3.05387	0.00225912	0.139187	93685	Entpd7
154.009	-2.19827	0.497074	-4.42242	9.76036e-06	0.00495264	329872	Frem1
43.5694	-2.19893	0.627909	-3.50199	0.000461798	0.0606036	17534	Mrc2
39.7392	-2.20582	0.671348	-3.28567	0.00101741	0.094208	18784	Pla2g5
269.647	-2.25269	0.582699	-3.86595	0.000110658	0.0281366	68178	Cgnl1
90.5064	-2.2599	0.479259	-4.7154	2.41235e-06	0.00145393	241694	Ralgapa2
97.6692	-2.27359	0.732311	-3.10468	0.00190485	0.131905	234915	Cep126
43.6495	-2.28793	0.780941	-2.92971	0.00339274	0.168789	71720	Osbpl3
20.2373	-2.29632	0.842173	-2.72667	0.00639778	0.215998	NA	Tmem194
448.526	-2.32963	0.701844	-3.31931	0.000902411	0.0895423	12111	Bgn
27.0865	-2.3302	0.903791	-2.57825	0.00993028	0.257976	15936	Ier2
523.566	-2.34221	0.4902	-4.77808	1.76977e-06	0.00119997	319876	Cobll1
111.719	-2.35803	0.621252	-3.7956	0.000147284	0.0322028	407800	Ecm2
35.4751	-2.3726	0.707963	-3.35131	0.000804313	0.0839012	50799	Slc25a13
27.4051	-2.38303	0.921314	-2.58656	0.00969396	0.255416	229003	Helz2
46.9821	-2.38394	0.898521	-2.65319	0.00797358	0.235062	216233	Socs2
37.6555	-2.38631	0.876964	-2.7211	0.00650651	0.216348	21753	Tes
323.958	-2.39195	0.711132	-3.36358	0.000769382	0.0812997	72605	Car10
33.1437	-2.39387	0.749403	-3.19437	0.00140136	0.111786	78878	Ftx
124.485	-2.39482	0.679742	-3.52314	0.000426471	0.0581596	13179	Dcn
36.8574	-2.41998	0.827596	-2.92411	0.00345441	0.169302	21689	Tekt1
20.0373	-2.42158	0.922889	-2.62392	0.00869254	0.244672	224697	Adamts10
94.0576	-2.42411	0.837833	-2.89331	0.00381206	0.17935	15223	Foxj1
32.3851	-2.44986	0.867341	-2.82456	0.00473456	0.189767	70598	Filip1
163.962	-2.49032	0.883192	-2.81968	0.00480715	0.190758	320311	Rnf152
173.193	-2.49434	0.775366	-3.21698	0.00129546	0.108683	170442	Bbox1
128.901	-2.50126	0.749766	-3.33606	0.000849755	0.0869689	14783	Grb10
79.151	-2.50547	0.687374	-3.64498	0.00026741	0.0458447	229699	Slc16a4
41.8324	-2.50597	0.720065	-3.48021	0.000501026	0.0629088	104681	Slc16a6
77.713	-2.51153	0.903387	-2.78013	0.00543371	0.198449	15957	Ifit1
175.922	-2.51602	0.464264	-5.41938	5.9807e-08	0.000194648	219140	Spata13
142.701	-2.52161	0.638514	-3.94919	7.8417e-05	0.0227871	18295	Ogn
30.0908	-2.53793	0.903389	-2.80935	0.0049642	0.191671	242484	D630039A03Rik
39.3379	-2.54123	0.928799	-2.73604	0.00621832	0.213033	72504	Taf4b
267.546	-2.5709	0.520125	-4.94286	7.69864e-07	0.000736941	12509	Cd59a
28.3086	-2.57287	0.759951	-3.38558	0.000710283	0.0792064	319893	A230057D06Rik
78.2225	-2.58138	0.661663	-3.90135	9.56588e-05	0.0251073	244416	Ppp1r3b
123.141	-2.60397	0.547047	-4.76006	1.93539e-06	0.00125979	50915	Grb14
17.7203	-2.61696	0.975968	-2.6814	0.00733158	0.226243	208908	Ccdc62
128.113	-2.64954	0.720964	-3.67499	0.000237856	0.0436341	269019	Stk32a
102.073	-2.66614	0.725648	-3.67415	0.000238643	0.0436341	99586	Dpyd
34.6936	-2.6692	0.936747	-2.84944	0.00437969	0.18631	238384	Slc24a4
15.8458	-2.70118	0.977551	-2.76322	0.00572346	0.205602	103836	Zfp692
30.4766	-2.74186	0.92329	-2.96966	0.00298129	0.158544	270672	Map3k15
91.2667	-2.76263	1.01635	-2.71819	0.00656402	0.217033	78749	Filip1l
1083.43	-2.77414	0.975187	-2.84472	0.00444502	0.186628	270097	Vat1l
26.0438	-2.78016	1.02924	-2.70119	0.00690923	0.220458	330577	Saxo2
26.0107	-2.80642	0.970491	-2.89175	0.00383104	0.17935	12338	Capn6
87.4606	-2.84406	0.595182	-4.77847	1.76637e-06	0.00119997	20897	Stra6
24.0574	-2.84664	1.08533	-2.62282	0.00872056	0.244672	20963	Syk
38.4047	-2.86972	0.741924	-3.86794	0.000109757	0.0281366	16068	Il18bp
2051.54	-2.91534	0.97203	-2.99923	0.00270665	0.152954	11815	Apod
125.151	-2.93007	0.909811	-3.22052	0.00127956	0.108449	23962	Oasl2
13.0613	-2.94341	1.1355	-2.59218	0.00953694	0.255124	67728	Dph2
28.0338	-2.9887	0.887103	-3.36906	0.000754252	0.0804702	109019	Nabp1
56.2234	-2.99048	0.760354	-3.93301	8.38899e-05	0.0235369	13052	Cxadr
393.354	-2.99908	0.544863	-5.50428	3.70684e-08	0.000150804	17294	Mest
32.5882	-3.00937	0.795128	-3.78476	0.00015386	0.0329443	73845	Ankrd42
46.0564	-3.01104	1.14278	-2.63485	0.00841747	0.240078	NA	Hrasls
14.1775	-3.01444	1.07547	-2.80292	0.00506421	0.192997	213539	Bag2
55.2922	-3.02046	0.852548	-3.54286	0.000395809	0.0565	229488	Fam160a1
30.5539	-3.02758	1.00699	-3.00657	0.00264211	0.152545	317750	Slc24a5
469.652	-3.05795	0.602962	-5.07154	3.9461e-07	0.00048508	80892	Zfhx4
20.0571	-3.06312	1.13989	-2.68722	0.00720502	0.224717	241230	St8sia6
45.2175	-3.06469	0.87017	-3.52194	0.000428401	0.0581596	75568	Capsl
183.687	-3.11839	0.699561	-4.45764	8.28676e-06	0.00449502	214704	Iqub
24.8197	-3.11965	0.981011	-3.18004	0.00147256	0.113222	114774	Pawr
34.3225	-3.12742	1.14872	-2.72251	0.00647874	0.216348	70536	Qpct
33.3941	-3.12802	0.983591	-3.1802	0.00147171	0.113222	16362	Irf1
21.0657	-3.14003	1.03097	-3.04569	0.00232146	0.140435	100502868	Gm20597
37.059	-3.17735	0.807138	-3.93657	8.26558e-05	0.0235369	13426	Dync1i1
36.5401	-3.18916	0.782551	-4.07533	4.59488e-05	0.0175255	12822	Col18a1
3628.45	-3.19119	1.23734	-2.57906	0.00990685	0.257943	239217	Kctd12
27.7481	-3.21138	0.951085	-3.37655	0.000734016	0.0798577	14823	Grm8
51.4783	-3.21296	1.03336	-3.10922	0.00187581	0.131009	14089	Fap
22.2165	-3.21354	1.0525	-3.05326	0.00226371	0.139187	14734	Gpc3
775.88	-3.25976	0.891442	-3.65673	0.000255457	0.0446994	94229	Slc4a10
52.7522	-3.27658	0.746036	-4.39199	1.12319e-05	0.00537579	77739	Adamtsl1
17.0562	-3.2791	1.07815	-3.0414	0.00235482	0.141926	NA	Lincpint
58.6623	-3.28154	1.17207	-2.79977	0.00511391	0.193532	66793	Efcab1
24.131	-3.30458	0.91702	-3.6036	0.000313835	0.0495828	24088	Tlr2
17.5063	-3.31112	1.05796	-3.12974	0.00174963	0.1258	27387	Sh2d3c
29.5958	-3.31319	1.00636	-3.29225	0.000993887	0.0940321	140919	Slc17a6
86.0491	-3.33006	0.740276	-4.49841	6.8464e-06	0.00397898	69590	Gpx8
34.9519	-3.36202	0.954674	-3.52164	0.000428879	0.0581596	228413	Prrg4
110.776	-3.39705	0.654567	-5.18977	2.10557e-07	0.000342639	17181	Matn2
19.8925	-3.48867	1.12709	-3.09529	0.00196624	0.133877	16977	Lrrc23
13.2519	-3.49029	1.31933	-2.64549	0.00815716	0.237888	260305	Nphp4
13.7033	-3.50281	1.25016	-2.80189	0.0050804	0.193162	94279	Sfxn2
81.9845	-3.51824	0.925888	-3.79985	0.000144782	0.0322028	64058	Perp
21.1006	-3.613	1.3683	-2.6405	0.00827834	0.238431	55987	Cpxm2
22.3712	-3.63323	1.13905	-3.18971	0.00142416	0.112502	12116	Bhmt
129.057	-3.66575	0.843074	-4.34807	1.3734e-05	0.0060397	18542	Pcolce
14.6366	-3.70506	1.25326	-2.95635	0.00311304	0.161848	192212	Prom2
55.0177	-3.77874	1.22917	-3.07423	0.00211047	0.135746	240638	Slc16a12
24.9888	-3.81853	1.35583	-2.81638	0.00485682	0.190988	72388	Ripk4
505.896	-3.82523	0.548778	-6.97045	3.15918e-12	2.57047e-08	240725	Sulf1
25.727	-3.83818	1.07577	-3.56784	0.000359931	0.0552562	24131	Ldb3
16.623	-3.85436	1.37151	-2.81031	0.00494937	0.191671	54485	Dll4
562.413	-3.87517	0.749914	-5.16748	2.37266e-07	0.000351002	232345	A2m
18.8269	-3.94453	1.49721	-2.63458	0.00842406	0.240078	69387	Dnajb13
52.1585	-3.95284	1.24976	-3.16287	0.00156222	0.117695	17380	Mme
56.6272	-3.95624	1.13152	-3.4964	0.000471587	0.0609058	23831	Car14
88.7613	-3.99936	0.761629	-5.25107	1.51219e-07	0.000307599	13136	Cd55
19.6303	-4.02126	1.37109	-2.9329	0.00335808	0.168709	268780	Egflam
17.9694	-4.03626	1.31712	-3.06446	0.00218066	0.137418	26563	Ror1
29.0425	-4.04611	1.13838	-3.55426	0.000379046	0.0560747	12560	Cdh3
60.7704	-4.09056	0.833441	-4.90803	9.19949e-07	0.00078212	13411	Dnah11
39.7978	-4.15918	1.43892	-2.89049	0.00384644	0.17935	230779	Serinc2
66.7187	-4.18479	1.53813	-2.72069	0.00651449	0.216348	76113	Lpo
115.665	-4.2041	0.968188	-4.34224	1.41037e-05	0.0060397	68655	Fndc1
21.3292	-4.20417	1.36594	-3.07786	0.0020849	0.135746	229474	Fhdc1
11.5729	-4.30712	1.56267	-2.75625	0.00584682	0.206838	74729	Setmar
23.0333	-4.33208	1.5528	-2.78985	0.00527331	0.195919	98741	Kcnb2
12.0306	-4.33959	1.65718	-2.61865	0.00882772	0.246404	12818	Col14a1
11.7629	-4.35993	1.67126	-2.60877	0.00908682	0.250153	224674	Slc37a1
25.0561	-4.37209	1.51818	-2.87983	0.00397892	0.180863	12702	Socs3
22.6111	-4.38478	1.62317	-2.70137	0.00690552	0.220458	230972	Arhgef16
5.00893	-4.57123	1.75569	-2.60367	0.00922318	0.251048	11536	Gpr182
44.2152	-4.59459	1.35202	-3.39831	0.000678042	0.0771592	73667	2410004P03Rik
5.20179	-4.67488	1.66201	-2.81279	0.00491137	0.191661	54137	Acrbp
5.41815	-4.71013	1.73962	-2.70756	0.00677788	0.219714	76265	Tsen54
15.2241	-4.72078	1.67529	-2.81789	0.00483404	0.190933	69847	Wnk4
15.6462	-4.75351	1.77388	-2.67972	0.00736836	0.226243	241226	Itga8
5.75535	-4.78276	1.67365	-2.85769	0.00426743	0.184691	50883	Chek2
6.16856	-4.82596	1.66901	-2.8915	0.00383402	0.17935	225651	Mppe1
5.96819	-4.83584	1.87067	-2.58509	0.00973527	0.255416	194744	Slc25a43
16.4517	-4.84432	1.65284	-2.9309	0.00337978	0.168709	12829	Col4a4
16.2516	-4.85534	1.74523	-2.78207	0.00540133	0.198394	20514	Slc1a5
32.5681	-4.90893	1.53499	-3.19803	0.00138371	0.111471	12160	Bmp5
17.8872	-4.91286	1.83862	-2.67203	0.00753932	0.228043	58222	Rab37
6.4925	-4.92424	1.90191	-2.58909	0.00962286	0.255416	252837	Ackr4
6.33103	-4.92538	1.79156	-2.74922	0.00597373	0.208159	100952	Emilin1
6.43863	-4.93641	1.78024	-2.77289	0.00555605	0.201528	102132	E230013L22Rik
17.5494	-4.96841	1.64219	-3.02547	0.00248243	0.146322	242608	Podn
6.95829	-5.00001	1.92331	-2.59969	0.00933081	0.252646	16408	Itgal
6.82721	-5.03015	1.80953	-2.77982	0.00543897	0.198449	231842	Amz1
7.07285	-5.05862	1.70532	-2.96637	0.00301341	0.15973	382073	Ccdc84
19.7294	-5.06474	1.58932	-3.18674	0.00143886	0.113073	320026	A330076H08Rik
7.14035	-5.12155	1.83717	-2.78774	0.00530773	0.196301	21853	Timeless
7.80335	-5.18847	1.88706	-2.7495	0.0059686	0.208159	101883	Igflr1
7.70339	-5.21804	1.92666	-2.70834	0.00676206	0.219714	208213	Tmem132c
7.92218	-5.22124	1.91223	-2.73044	0.00632497	0.214072	269855	Ssc5d
64.5032	-5.26644	1.935	-2.72167	0.00649525	0.216348	282663	Serpinb1b
8.1388	-5.31749	1.66215	-3.19916	0.00137827	0.111471	21892	Tll1
8.5953	-5.31776	1.76523	-3.0125	0.00259102	0.150585	72701	Zfp618
43.0809	-5.3401	2.04585	-2.61021	0.00904877	0.250153	24052	Sgcd
8.54583	-5.36406	2.08164	-2.57684	0.00997085	0.257976	57890	Il17re
8.83716	-5.39742	1.87068	-2.88527	0.00391076	0.179844	18689	Phxr4
9.03545	-5.43091	1.71218	-3.17192	0.00151433	0.114617	50795	Sh3bgr
24.9534	-5.45507	1.65227	-3.30156	0.000961505	0.0931343	268935	Scube3
9.14448	-5.45639	1.95464	-2.79151	0.00524634	0.195621	50908	C1s1
156.451	-5.5019	0.74896	-7.34606	2.0414e-13	3.32196e-09	11826	Aqp1
9.81108	-5.52395	1.96149	-2.8162	0.00485952	0.190988	319991	Kif6
9.69429	-5.5437	1.89644	-2.9232	0.00346449	0.169302	13836	Epha2
9.74603	-5.5535	1.91	-2.9076	0.00364216	0.175872	14119	Fbn2
10.0958	-5.5788	1.9953	-2.79597	0.00517446	0.194917	20618	Sncg
10.547	-5.63952	1.83215	-3.07809	0.00208331	0.135746	100862359	Gm21671
11.26	-5.7473	2.03358	-2.8262	0.0047104	0.189767	384198	Fam47e
12.4782	-5.91297	2.01737	-2.93103	0.00337837	0.168709	108096	Slco1a5
13.8674	-6.05552	1.72292	-3.51468	0.000440292	0.0592138	64580	Ndst4
14.4829	-6.11944	1.99399	-3.06895	0.00214813	0.137418	72027	Slc39a4
14.4496	-6.12447	2.00613	-3.05287	0.00226661	0.139187	12767	Cxcr4
14.704	-6.12733	1.76096	-3.47953	0.000502295	0.0629088	14165	Fgf10
15.2557	-6.1571	1.6956	-3.63122	0.000282084	0.0473231	19713	Ret
17.1977	-6.35493	2.02822	-3.13325	0.0017288	0.125035	12266	C3
17.4352	-6.39717	1.83968	-3.47733	0.000506425	0.0629088	100504377	Gm20199
17.8886	-6.41715	1.68335	-3.81213	0.000137775	0.0320287	170829	Tram2
18.5806	-6.45557	1.70048	-3.79632	0.000146859	0.0322028	210417	Thsd7b
18.9988	-6.49398	1.69309	-3.83559	0.000125264	0.0304241	320302	Glt28d2
19.0524	-6.50189	1.85389	-3.50717	0.000452905	0.0599465	244653	Hydin
51.0858	-6.52285	2.45432	-2.6577	0.00786763	0.232359	242653	Cldn19
19.6701	-6.54424	1.67601	-3.90466	9.4356e-05	0.0251073	11854	Rhod
57.2149	-6.59449	2.32107	-2.84114	0.00449525	0.186628	11695	Alx4
24.1796	-6.8443	1.97677	-3.46236	0.000535468	0.0655163	NA	4931429I11Rik
29.8708	-7.17204	1.72651	-4.15406	3.26632e-05	0.0132882	108015	Chrnb4
36.3401	-7.44514	2.24435	-3.31728	0.000909	0.0896494	58207	Slc43a3
23.1751	-19.6529	4.01005	-4.90091	9.53949e-07	0.00078212	20199	S100a5
48.3431	-20.2388	4.00949	-5.04771	4.47133e-07	0.00048508	20592	Kdm5d
66.2254	-21.1066	4.00935	-5.26435	1.40689e-07	0.000307599	22290	Uty
189.158	-21.4384	4.00911	-5.34743	8.92139e-08	0.000241963	26900	Ddx3y

## Sheet: BS_specific_DEGs
baseMean	log2FoldChange	lfcSE	stat	pvalue	padj	ExtrezID	GeneSymbol
11.848	8.18521	1.0256	7.98088	1.45292e-15	9.87719e-13	15399	Hoxa2
14.8096	8.12858	1.03827	7.82895	4.91955e-15	2.91285e-12	64290	Foxb1
9.1378	7.8175	1.11985	6.98087	2.93362e-12	8.28408e-10	18505	Pax3
19.6655	7.76712	1.28908	6.02533	1.6876e-09	2.79062e-07	56410	Cbln3
8.30053	7.67901	1.3649	5.62605	1.84383e-08	2.48849e-06	15410	Hoxb3
8.14374	7.63657	1.30572	5.84853	4.95927e-09	7.46126e-07	14399	Gabra6
10.2737	7.61717	1.03032	7.393	1.43557e-13	5.98862e-11	16372	Irx2
80.7948	7.59854	1.50033	5.06456	4.09338e-07	3.83337e-05	13142	Dao
7.00394	7.42459	1.25411	5.92019	3.21564e-09	5.08819e-07	15402	Hoxa5
6.5581	7.32287	1.36812	5.35253	8.67348e-08	9.82727e-06	15400	Hoxa3
6.91321	7.03711	1.434	4.90732	9.23292e-07	8.10862e-05	20737	Spn
5.00913	6.93464	1.52096	4.5594	5.1301e-06	0.000359401	319970	B230323A14Rik
4.58869	6.82807	1.9713	3.46374	0.00053272	0.0143584	20339	Sele
4.56755	6.80133	1.5145	4.49081	7.09537e-06	0.000475312	15434	Hoxd3
7.22832	6.70228	1.18424	5.65956	1.51758e-08	2.11025e-06	16371	Irx1
3.84691	6.57142	1.57041	4.18454	2.85749e-05	0.00148581	15423	Hoxc4
3.37767	6.38687	1.76049	3.6279	0.000285737	0.00917299	102634678	Haglr
3.04127	6.23564	1.7485	3.56627	0.000362094	0.0108955	238057	Gdf7
6.85394	6.19478	1.42524	4.34648	1.38338e-05	0.000827101	11831	Aqp6
2.67683	6.05152	2.29177	2.64054	0.00827742	0.10124	15413	Hoxb5
2.56321	5.98912	1.84766	3.24146	0.00118918	0.0258926	15436	Hoxd4
9.04512	5.84216	1.03024	5.67069	1.42223e-08	1.99276e-06	14654	Glra1
6.35454	5.77924	1.39228	4.15093	3.31127e-05	0.00164665	224419	Map3k7cl
2.07613	5.68103	1.9531	2.90872	0.00362915	0.0588975	381122	Capn13
2.80778	5.67578	1.6763	3.38591	0.000709437	0.0177408	14729	Gp5
10.8703	5.65478	0.977313	5.78605	7.20614e-09	1.05815e-06	14255	Flt3
3.73438	5.60546	1.96449	2.85339	0.00432556	0.0664729	74400	Zfp819
2.54184	5.55679	1.62006	3.42999	0.000603613	0.015805	194974	Sun3
243.607	5.5553	1.48504	3.74085	0.000183398	0.00653644	232174	Cyp26b1
7.12434	5.53817	1.3149	4.21186	2.53279e-05	0.00134362	16373	Irx3
10.9644	5.47925	1.18582	4.62063	3.82571e-06	0.000279764	22423	Wnt8b
4.83319	5.45042	1.28896	4.22854	2.35212e-05	0.0012698	104245	Slc6a5
7.02063	5.38672	1.02772	5.24141	1.59356e-07	1.69074e-05	26564	Ror2
3.80439	5.38	1.36284	3.94764	7.89258e-05	0.00337689	223650	Eppk1
3.62898	5.36735	1.97628	2.71589	0.0066098	0.088299	333564	Fndc3c1
13.8886	5.30615	1.1075	4.79111	1.65864e-06	0.000137757	245827	Fat2
5.86245	5.30313	1.18683	4.46833	7.88338e-06	0.000516784	23937	Mab21l2
4.82353	5.26388	1.96677	2.67641	0.00744155	0.0947881	74918	Iqca
3.94936	5.1465	1.6244	3.16826	0.00153356	0.031353	245026	Col6a6
23.2024	5.10145	1.02357	4.98398	6.22902e-07	5.71669e-05	19144	Klk6
9.49168	4.756	1.00541	4.73043	2.24049e-06	0.000176305	216225	Slc5a8
7.93589	4.70746	0.878469	5.35871	8.38195e-08	9.55594e-06	67375	Qprt
16.851	4.70712	0.834672	5.63949	1.70557e-08	2.3298e-06	20980	Syt2
4.68951	4.69918	1.05736	4.44424	8.82015e-06	0.000568049	68527	Ucma
4.08916	4.65067	1.70757	2.72356	0.00645824	0.0871178	100042194	Gm13446
5.33312	4.53849	1.69763	2.67343	0.00750792	0.0953923	18096	Nkx6-1
5.05732	4.50269	1.20029	3.75134	0.000175895	0.0063305	100169874	Gm11110
11.5745	4.48485	1.30703	3.43132	0.000600663	0.0157502	16176	Il1b
4.74368	4.46245	1.60008	2.78889	0.00528894	0.0761999	NA	Fam19a4
2.64116	4.37152	1.63819	2.66851	0.0076188	0.0961782	16196	Il7
4.26771	4.30389	1.24667	3.45232	0.000555791	0.014871	19332	Rab20
3.78758	4.23687	1.41899	2.98584	0.00282801	0.0489885	NA	Pydc3
7.02437	4.12289	1.07446	3.83716	0.000124463	0.00484009	NA	1700026D08Rik
4.58243	4.10793	1.45741	2.81864	0.0048227	0.0715249	104080	Nxph4
66.7187	4.08407	0.567405	7.1978	6.119e-13	2.24629e-10	76113	Lpo
3.25453	4.03982	1.37648	2.93489	0.00333671	0.0553755	102635290	Ttc39aos1
40.8123	3.98089	0.50747	7.84459	4.34357e-15	2.74918e-12	100503592	A330076C08Rik
9.14465	3.97543	1.06989	3.71573	0.000202616	0.00707036	613264	1810020O05Rik
8.77045	3.95267	1.46941	2.68996	0.00714601	0.0928931	NA	BC021891
4.66668	3.93446	1.45609	2.70208	0.00689077	0.0908916	71091	Cdkl1
24.5914	3.88291	0.881085	4.40697	1.04828e-05	0.000656693	239789	Gmnc
5.37034	3.85786	1.41306	2.73015	0.00633058	0.0859452	75404	Arhgap36
8.47625	3.80854	1.01413	3.75549	0.000173005	0.00626334	13190	Dct
3.08152	3.80575	1.41669	2.68636	0.00722351	0.0933058	11624	Ahrr
3.38195	3.72137	1.21289	3.06818	0.00215364	0.0401234	20724	Serpinb5
2.96469	3.70984	1.22691	3.02374	0.00249672	0.0445791	108115	Slco4a1
9.60273	3.69825	1.30081	2.84303	0.00446866	0.0679554	13799	En2
3.78896	3.67448	1.33527	2.75186	0.00592577	0.0817186	71398	5430427O19Rik
82.6413	3.66232	0.511067	7.16603	7.72034e-13	2.69757e-10	380684	Nefh
12.7546	3.62449	1.00388	3.61049	0.000305618	0.00958909	209837	Slc38a5
13.4363	3.61311	1.25067	2.88893	0.0038655	0.0614516	332942	Gm853
12.093	3.6013	1.30499	2.75963	0.00578662	0.0805126	19363	Rad51b
22.6926	3.58554	0.778689	4.60459	4.13275e-06	0.000297477	78754	Galnt15
7.41255	3.43875	0.990975	3.47007	0.000520332	0.0141492	331374	Dgkk
3.9803	3.41102	1.2104	2.8181	0.00483091	0.0715668	71522	Ggt6
65.2224	3.40914	0.535545	6.36575	1.94333e-10	4.0534e-08	22317	Vamp1
4.05548	3.40281	1.22985	2.76685	0.00566005	0.0795485	245527	Eda2r
11.2376	3.37702	1.12573	2.99985	0.00270113	0.0471856	72433	Rab38
24.1796	3.3683	1.04133	3.23462	0.00121805	0.0263156	NA	4931429I11Rik
63.0176	3.36361	0.324303	10.3718	3.33119e-25	5.55854e-22	71934	Car13
21.6297	3.34316	0.928585	3.60028	0.00031788	0.00992295	244958	Mrap2
3.92003	3.31902	1.26654	2.62054	0.00877916	0.104198	NA	Gm16532
4.45744	3.31009	1.20642	2.74372	0.00607465	0.0834332	74134	Cyp2s1
6.57813	3.27741	1.15626	2.83449	0.00458991	0.069147	63993	Slc5a7
13.0932	3.24203	1.10641	2.93023	0.00338712	0.0559591	72789	Veph1
17.8572	3.22646	1.03293	3.1236	0.00178655	0.0349968	14912	Nkx6-2
8.88436	3.22164	1.10394	2.9183	0.00351945	0.0576266	74354	Lrguk
8.77409	3.2011	0.916911	3.49118	0.0004809	0.0133539	244810	AW551984
16.8912	3.17892	0.75365	4.21804	2.46438e-05	0.00131633	68947	Chst8
86.8441	3.17387	1.01419	3.12947	0.00175121	0.0343781	14077	Fabp3
8.68992	3.16602	1.02772	3.08062	0.0020657	0.0389227	19293	Pvalb
53.5103	3.1636	0.608473	5.19924	2.00102e-07	2.01806e-05	18040	Nefm
52.9816	3.1558	0.605629	5.21078	1.88052e-07	1.91761e-05	54612	Sfrp5
9.31668	3.11596	1.0443	2.98379	0.00284701	0.0492061	332934	Zmynd12
21.5782	3.11301	0.883498	3.5235	0.00042588	0.0122539	244954	Prss35
9.19832	3.10944	0.917431	3.38929	0.000700732	0.0176047	16399	Itga2b
9.81108	3.10716	1.00332	3.09689	0.00195563	0.0373913	319991	Kif6
151.439	3.06455	0.41047	7.46596	8.2695e-14	3.70211e-11	11419	Asic1
12.0064	3.06074	0.96662	3.16644	0.00154318	0.0314375	19227	Pthlh
41.5494	3.06035	0.700202	4.37067	1.23865e-05	0.000747873	75718	Vwa5b1
27.3791	3.04958	0.833754	3.65765	0.000254539	0.00840299	66039	Tmem254a
13.3193	3.01804	0.998718	3.02191	0.00251186	0.0447623	381546	Ccdc24
46.0564	3.01678	0.654024	4.61265	3.97571e-06	0.000288435	NA	Hrasls
5.45473	3.00695	0.89263	3.36864	0.000755398	0.0185118	68458	Ppp1r14a
30.7504	3.00064	0.574918	5.21924	1.79658e-07	1.87186e-05	13386	Dlk1
15.5341	2.99186	0.853658	3.50475	0.000457044	0.0128864	109904	Mcf2
14.1071	2.98931	1.07868	2.77127	0.00558378	0.078778	432995	Smim22
8.81481	2.98776	1.034	2.8895	0.00385857	0.061433	13982	Esr1
35.4724	2.92014	0.505607	5.7755	7.67235e-09	1.11767e-06	21667	Tdgf1
12.1114	2.89511	0.866954	3.3394	0.000839586	0.0200398	208890	Slc26a7
13.8608	2.87648	1.09679	2.62262	0.00872565	0.103805	75973	Ccdc162
27.6463	2.84408	0.99367	2.8622	0.00420708	0.0651105	320214	Maats1
16.4571	2.83606	0.767626	3.69458	0.000220248	0.00752821	218440	Ankrd34b
12.9073	2.81902	1.01162	2.78665	0.0053256	0.0765047	20474	Six4
15.0017	2.80919	0.988455	2.842	0.00448318	0.0681199	69952	Tunar
6.40436	2.79932	0.844835	3.31345	0.000921534	0.0215475	69815	Krtcap3
18.8269	2.77486	0.831604	3.33676	0.000847609	0.0201788	69387	Dnajb13
836.452	2.77408	0.834835	3.32291	0.000890849	0.0209367	14802	Gria4
3.77967	2.75162	1.0502	2.62009	0.00879075	0.104234	234684	Lrrc29
983.016	2.73766	1.00741	2.71753	0.00657709	0.0880415	102465959	Mir6236
15.4376	2.73501	0.866059	3.15799	0.00158859	0.0321483	230603	Ttc39a
126.936	2.70628	0.987667	2.74007	0.0061426	0.0841239	75767	Rab11fip1
19590.2	2.70026	0.93003	2.90341	0.00369125	0.0595842	102436	Lars2
236.946	2.69026	0.380864	7.06358	1.62267e-12	4.80389e-10	26381	Esrrg
16.3369	2.68531	1.00148	2.68135	0.00733247	0.093974	12825	Col3a1
44.2152	2.66516	0.880163	3.02803	0.00246153	0.0441225	73667	2410004P03Rik
7.31585	2.65039	0.917551	2.88855	0.00387023	0.0614516	13592	Ebf2
18.8733	2.64635	0.947516	2.79294	0.00522322	0.0755699	105833	Ccdc65
21.5122	2.62981	0.796819	3.30039	0.000965517	0.0221526	67606	Fibin
38.3178	2.6055	0.708948	3.67517	0.000237691	0.0080199	328957	9330117O12Rik
279.262	2.59925	0.940742	2.76298	0.00572765	0.0800987	20563	Slit2
60.8429	2.57561	0.849766	3.03096	0.00243775	0.0438676	19752	Rnase1
13.6042	2.57255	0.87179	2.95088	0.00316866	0.0534965	238076	Kcns3
56.6272	2.55798	0.764959	3.34395	0.000825959	0.019797	23831	Car14
9.38122	2.54786	0.871912	2.92215	0.00347627	0.0571143	230678	Tmem125
538005	2.54748	0.891623	2.85713	0.00427489	0.0660323	100861531	Rn45s
47.4129	2.50135	0.697213	3.58764	0.000333685	0.0102494	231287	Atp10d
8.15048	2.49247	0.752645	3.31161	0.000927611	0.0216344	75732	Iqcd
19.1712	2.48473	0.922189	2.69439	0.00705182	0.092191	17152	Mak
27.4304	2.46788	0.471027	5.23936	1.61137e-07	1.69981e-05	319982	5930430L01Rik
1901.01	2.46755	0.356522	6.92118	4.47906e-12	1.22706e-09	11668	Aldh1a1
24.1051	2.45381	0.832634	2.94704	0.00320831	0.0538286	629147	Ctxn3
58.6623	2.44849	0.852676	2.87154	0.0040848	0.0639749	66793	Efcab1
663.898	2.43962	0.321125	7.59711	3.02813e-14	1.46267e-11	11606	Agt
22.6808	2.43937	0.937648	2.60159	0.00927929	0.108347	114602	Zmynd10
5.1764	2.42014	0.921989	2.62491	0.00866726	0.103728	237211	Fancb
65.8689	2.41915	0.798699	3.02886	0.00245476	0.0440872	75050	Kif27
9.29275	2.41713	0.805601	3.0004	0.00269623	0.0471776	67103	Ptgr1
44.7783	2.41631	0.502316	4.81034	1.50676e-06	0.000126901	14778	Gpx3
10.7361	2.40435	0.831355	2.89208	0.00382695	0.0612687	14618	Gjb1
13.2656	2.39277	0.753645	3.17493	0.00149873	0.0307708	20708	Serpinb6b
123.279	2.37761	0.333136	7.13704	9.53612e-13	3.12564e-10	56219	Extl1
7.03663	2.33823	0.87264	2.67949	0.00737342	0.0942642	71966	Nkiras2
24.9888	2.33238	0.890054	2.6205	0.00878014	0.104198	72388	Ripk4
25.5084	2.3303	0.767697	3.03544	0.00240182	0.043506	237504	Rassf9
6.25079	2.31953	0.790094	2.93577	0.00332726	0.0552686	67620	Lrp2bp
10.5572	2.31877	0.58408	3.96995	7.18892e-05	0.00314893	54562	Lrrc6
20.0445	2.309	0.586441	3.93731	8.24004e-05	0.00347999	12716	Ckmt1
167.893	2.30689	0.36553	6.31108	2.77102e-10	5.46904e-08	12843	Col1a2
29.3013	2.27136	0.547266	4.15037	3.31932e-05	0.00164665	75172	Ccdc146
133.436	2.26871	0.50516	4.49107	7.08649e-06	0.000475312	12180	Smyd1
14.0312	2.25915	0.627233	3.60177	0.000316062	0.009883	209601	Erich3
155.218	2.25472	0.369785	6.09737	1.0783e-09	1.86719e-07	320092	E030003E18Rik
21.3882	2.25324	0.641009	3.51514	0.000439516	0.0125659	434215	Lrrc32
28.9952	2.25104	0.779744	2.8869	0.0038906	0.0616684	74405	Efhc2
173.193	2.24453	0.491382	4.56778	4.92915e-06	0.000346645	170442	Bbox1
94.0576	2.2413	0.527615	4.24799	2.15699e-05	0.00117832	15223	Foxj1
15.2967	2.23979	0.59257	3.77979	0.000156958	0.00580838	245038	Dclk3
73.8885	2.23888	0.76374	2.93147	0.00337357	0.0558357	18208	Ntn1
182.394	2.22626	0.517535	4.30167	1.69519e-05	0.000978466	18039	Nefl
152.172	2.20464	0.636283	3.46488	0.000530477	0.0143423	269275	Acvr1c
9.72083	2.19436	0.777752	2.82141	0.00478132	0.0712228	12763	Cmah
37.4457	2.19309	0.802478	2.7329	0.00627791	0.0855464	230718	Nt5c1a
17.2048	2.19247	0.835278	2.62484	0.00866898	0.103728	60613	Kcnq4
123.427	2.18558	0.580193	3.76698	0.000165235	0.0060416	237010	Klhl4
31.6867	2.17765	0.83992	2.59269	0.00952279	0.110487	381605	Tbc1d2
159.719	2.16733	0.401575	5.39709	6.77319e-08	8.02076e-06	57915	Tbc1d1
13.0127	2.15702	0.716553	3.01027	0.00261019	0.0461732	319951	A230001M10Rik
15.1049	2.14377	0.711125	3.01461	0.00257309	0.0457203	66102	Cxcl16
14.5569	2.14223	0.682651	3.1381	0.00170048	0.0335616	19201	Pstpip2
53.8199	2.12774	0.483637	4.39945	1.08523e-05	0.000672955	105440	Kctd9
42.6494	2.11691	0.634235	3.33775	0.000844611	0.0201336	194237	Rimkla
128.713	2.11501	0.591661	3.5747	0.00035063	0.0106575	16777	Lamb1
80.179	2.10291	0.686327	3.064	0.00218398	0.0404924	329977	Fhad1
32.233	2.09528	0.74686	2.80545	0.00502465	0.073488	74199	Vit
44.3302	2.09073	0.476843	4.38452	1.1624e-05	0.000711193	433323	Sgpp2
42.7983	2.08995	0.607967	3.43761	0.000586865	0.015488	69327	1700007K13Rik
323.958	2.07771	0.473647	4.38663	1.15119e-05	0.000709063	72605	Car10
163.962	2.07061	0.794893	2.60489	0.00919038	0.107583	320311	Rnf152
43.4811	2.05245	0.520603	3.94244	8.06553e-05	0.00343487	19762	Rit2
137.585	2.05186	0.396735	5.17187	2.31766e-07	2.32462e-05	209268	Igsf1
39.4003	2.04956	0.769315	2.66413	0.00771871	0.0971721	76670	Cfap70
39.3379	2.03595	0.622997	3.268	0.00108312	0.0240687	72504	Taf4b
85.9936	2.03466	0.507151	4.01193	6.02248e-05	0.00269616	11551	Adra2a
26.4929	2.02052	0.567144	3.56262	0.000367175	0.0109943	237436	Gas2l3
12.0931	2.01821	0.770184	2.62042	0.00878208	0.104198	74435	Lrriq3
19.6169	2.01744	0.612346	3.2946	0.000985612	0.0224502	17427	Mns1
66.9108	2.0153	0.571963	3.52347	0.000425931	0.0122539	60510	Syt9
15.4451	2.00804	0.610606	3.2886	0.00100688	0.0227882	110175	Ggct
775.113	2.00197	0.211717	9.45587	3.20336e-21	4.19983e-18	320404	Itpkb
36.0315	1.98807	0.531107	3.74325	0.000181656	0.0064996	195727	Nhs
11.6848	1.97682	0.699418	2.82637	0.00470783	0.0704831	170748	Smco4
20.137	1.96061	0.738026	2.65655	0.00789443	0.0985127	235472	Prtg
98.874	1.95914	0.360449	5.43526	5.4716e-08	6.60732e-06	270028	Fam155a
80.3989	1.95714	0.630703	3.10311	0.00191499	0.0369272	207686	Cfap69
64.7563	1.93483	0.562182	3.44164	0.000578207	0.0152925	21987	Tpd52l1
53.2017	1.93395	0.411867	4.69557	2.65867e-06	0.000202489	15460	Hr
45.6722	1.93123	0.69945	2.76107	0.00576125	0.0802944	12700	Cish
277.728	1.92595	0.424388	4.53818	5.67418e-06	0.000390073	68813	Dock5
673.649	1.92318	0.358642	5.3624	8.21253e-08	9.48057e-06	14555	Gpd1
18.5275	1.92049	0.629598	3.05034	0.0022858	0.0419335	228421	Kif18a
26.6742	1.91846	0.533635	3.59509	0.000324283	0.0100544	209012	Ulk4
71.045	1.91292	0.661514	2.89172	0.00383134	0.0612687	75472	Cfap126
75.895	1.90953	0.493729	3.86758	0.000109921	0.00436438	171212	Galnt10
34.9475	1.90672	0.596902	3.19436	0.00140142	0.029499	214791	Sertad4
65.3808	1.89964	0.32436	5.85659	4.72459e-09	7.16693e-07	240753	Plekha6
10.9939	1.89879	0.612984	3.09761	0.00195087	0.037378	229780	Trmt13
994.484	1.881	0.725726	2.59189	0.00954502	0.110498	53416	Stk39
52.0429	1.87946	0.47387	3.96619	7.30298e-05	0.00317645	227933	Ccdc148
75.048	1.87886	0.4414	4.25659	2.07571e-05	0.00114071	66066	Gng11
17.3625	1.87873	0.72135	2.60446	0.00920194	0.107649	12865	Cox7a1
71.4848	1.87416	0.495677	3.78102	0.000156188	0.00579157	73750	Whrn
21.1901	1.86941	0.577071	3.23948	0.00119747	0.0259805	319455	Pld5
92.3298	1.85731	0.41341	4.49267	7.03363e-06	0.000474641	54141	Spag5
12987.4	1.84847	0.315436	5.86004	4.62751e-09	7.07816e-07	20692	Sparc
14.2968	1.83682	0.687816	2.6705	0.00757377	0.0957438	26903	Dysf
26.8762	1.83061	0.703945	2.6005	0.00930883	0.108523	73332	Ccdc30
21.4063	1.82659	0.688554	2.6528	0.00798281	0.0989362	67586	Ubxn11
281.042	1.82377	0.412189	4.42458	9.66292e-06	0.000617989	13869	Erbb4
141.453	1.80884	0.510844	3.54089	0.000398775	0.0116627	269629	Lhfpl3
121.081	1.80697	0.585437	3.08652	0.00202512	0.0383494	83671	Sytl2
204.598	1.8004	0.431036	4.1769	2.95504e-05	0.00152788	330938	Dixdc1
24.7245	1.79943	0.582471	3.08931	0.00200625	0.038042	74257	Tspan17
82.7834	1.79908	0.447652	4.01893	5.8462e-05	0.00264412	380660	Acss3
23831	1.79338	0.459408	3.90368	9.47421e-05	0.00389036	17196	Mbp
178.083	1.79054	0.618216	2.8963	0.00377591	0.0606359	338367	Myo1d
34.6936	1.7862	0.683637	2.61279	0.00898077	0.105736	238384	Slc24a4
19.0348	1.7826	0.663507	2.68663	0.00721776	0.0932971	232035	Ccser1
62.1794	1.77503	0.481079	3.68967	0.000224542	0.00763435	17268	Meis1
100.764	1.77318	0.498097	3.55991	0.000370984	0.0110902	68519	Eml1
123.814	1.76842	0.471547	3.75025	0.00017666	0.00634558	20442	St3gal1
42.5065	1.76572	0.536842	3.28908	0.00100515	0.0227882	433940	Fam222a
354.942	1.75942	0.422078	4.16848	3.06641e-05	0.00157036	23966	Tenm4
685.222	1.75416	0.373505	4.69648	2.64678e-06	0.000202489	22228	Ucp2
27.8424	1.75116	0.517709	3.38251	0.000718262	0.0178399	NA	Wbscr27
204.832	1.74697	0.492715	3.54559	0.000391731	0.0115785	13483	Dpp6
808.011	1.74533	0.40306	4.33019	1.48977e-05	0.000875915	56839	Lgi1
299.416	1.73397	0.525369	3.30047	0.000965238	0.0221526	399558	Flrt2
54.3545	1.73322	0.374506	4.62803	3.69152e-06	0.000271422	23794	Adamts5
78.2806	1.73267	0.441459	3.92486	8.67785e-05	0.00360366	27428	Shroom3
861.689	1.7226	0.463849	3.71371	0.000204242	0.00710995	22153	Tubb4a
141.781	1.72104	0.479739	3.58745	0.000333922	0.0102494	269823	Pon3
72.2304	1.71932	0.501896	3.42565	0.000613324	0.0159688	71877	Efhc1
32.0311	1.71683	0.436065	3.9371	8.24731e-05	0.00347999	320398	Lrig3
68.8344	1.71151	0.471779	3.62779	0.000285859	0.00917299	67338	Rffl
2396.3	1.71029	0.469826	3.64026	0.000272362	0.00887959	76960	Bcas1
4523.43	1.70466	0.195795	8.70637	3.13755e-18	2.87949e-15	226025	Trpm3
13.6295	1.69759	0.600872	2.82521	0.00472497	0.0706819	11423	Ache
28.2316	1.69237	0.549661	3.07894	0.00207738	0.0390679	63959	Slc29a1
47.437	1.69024	0.481426	3.5109	0.00044659	0.0127088	20911	Stxbp2
73.4348	1.68899	0.392164	4.30684	1.65602e-05	0.00095887	51938	Ccdc39
163.572	1.68098	0.49874	3.37045	0.000750449	0.0184645	212531	Sh3bgrl2
664.408	1.67452	0.443189	3.77835	0.00015787	0.00583039	58869	Pex5l
154.35	1.67201	0.558152	2.99561	0.00273892	0.0476972	66859	Slc16a9
394.074	1.6708	0.523673	3.19053	0.0014201	0.0297557	22239	Ugt8a
25.4663	1.66783	0.515866	3.23306	0.00122472	0.0264156	66959	Dusp26
115.499	1.66726	0.364907	4.56898	4.90093e-06	0.000345987	73884	Zdbf2
13.9484	1.66286	0.640112	2.59777	0.0093831	0.109073	70393	2210416O15Rik
190.614	1.66133	0.393991	4.21665	2.47955e-05	0.00131919	208618	Etl4
115.1	1.65709	0.471356	3.51558	0.000438787	0.0125646	226101	Myof
10.8746	1.65459	0.626874	2.63942	0.00830474	0.101352	212198	Wdr25
228.48	1.6477	0.260757	6.31891	2.63415e-10	5.32766e-08	214944	Mob3b
58.0708	1.64498	0.471321	3.49015	0.000482757	0.0133852	NA	Fam69a
445.376	1.64459	0.490884	3.35025	0.000807379	0.0194718	320587	Tmem88b
80.5376	1.64167	0.492517	3.33323	0.000858437	0.0203575	237988	Cdr2l
94.4315	1.64074	0.387997	4.22875	2.34998e-05	0.0012698	30805	Slc22a4
160.446	1.63467	0.412689	3.96101	7.46327e-05	0.00323086	72902	Spock3
30.6057	1.62881	0.479909	3.39399	0.000688823	0.0174159	15569	Elavl2
81.81	1.6269	0.381781	4.26134	2.03201e-05	0.00112682	NA	Inadl
26.7308	1.62181	0.614523	2.63913	0.00831186	0.101372	21916	Tmod1
40.5162	1.61749	0.54809	2.95113	0.00316613	0.0534965	94226	S1pr5
303.192	1.61546	0.522075	3.09431	0.00197271	0.0376394	15452	Hprt
114.731	1.61341	0.321014	5.02598	5.00859e-07	4.66664e-05	338351	Akap17b
142.962	1.61202	0.597194	2.69933	0.00694792	0.0914239	102502	Pls1
141.353	1.60764	0.445115	3.61174	0.000304153	0.00957586	231238	Sel1l3
30.7555	1.60577	0.623203	2.57664	0.00997669	0.114308	16425	Itih2
39.578	1.60031	0.455631	3.5123	0.000444245	0.0126814	231134	Dok7
421.869	1.59712	0.408003	3.91449	9.05941e-05	0.00372837	54366	Ctnnal1
21.33	1.59621	0.508615	3.13835	0.001699	0.0335616	268481	Krt222
175.698	1.59531	0.575199	2.77349	0.0055458	0.0783627	218294	Cdc14b
849.806	1.59366	0.236806	6.72982	1.69875e-11	4.39162e-09	269116	Nfasc
409.361	1.59039	0.351098	4.52976	5.90515e-06	0.000402933	68743	Anln
56.3431	1.58874	0.543877	2.92113	0.00348759	0.0572071	16400	Itga3
1047.81	1.58349	0.324869	4.87422	1.09238e-06	9.41344e-05	16426	Itih3
522.337	1.57507	0.410989	3.8324	0.000126901	0.00491408	387314	Tmtc1
171.925	1.5691	0.492456	3.18628	0.00144117	0.0299238	12380	Cast
16.3023	1.56492	0.534987	2.92516	0.00344284	0.0567265	63953	Dusp10
129.028	1.56363	0.550816	2.83874	0.00452916	0.0685007	242202	Pde5a
168.102	1.56337	0.414801	3.76895	0.000163937	0.00600612	18197	Nsg2
414.653	1.55446	0.425482	3.6534	0.000258788	0.00849741	118446	Gjc3
1651.15	1.54788	0.491739	3.14777	0.0016452	0.0329004	17433	Mobp
238.891	1.54782	0.457425	3.38376	0.000715017	0.0177834	16543	Mdfic
137.738	1.54729	0.361305	4.28252	1.84789e-05	0.00104363	110596	Arhgef28
91.4579	1.52914	0.439917	3.47598	0.000508985	0.0139439	20257	Stmn2
38.3565	1.52881	0.579176	2.63963	0.00829971	0.101352	71096	Sntg1
39.9498	1.52568	0.447365	3.41036	0.000648773	0.0165853	381218	4430402I18Rik
32.1685	1.52482	0.542209	2.81224	0.00491972	0.0725896	114479	Slc5a5
73.0695	1.52394	0.347541	4.38492	1.16028e-05	0.000711193	74019	Traf3ip1
38.9164	1.51862	0.463193	3.2786	0.00104323	0.0234088	97130	C77080
58.1289	1.51846	0.562942	2.69737	0.00698898	0.0917193	16511	Kcnh2
44.3149	1.51662	0.540192	2.80755	0.00499195	0.0733018	67971	Tppp3
44.3845	1.5153	0.467727	3.23971	0.00119653	0.0259805	66892	Eif4e3
65.0601	1.50978	0.480783	3.14024	0.00168808	0.0334246	77963	Hook1
91.5753	1.50733	0.389677	3.86816	0.000109658	0.00436438	140792	Colec12
61.2673	1.49434	0.554043	2.69716	0.00699339	0.0917193	67569	Mgat4c
60.8003	1.49422	0.433883	3.44383	0.000573539	0.0151909	74091	Npl
20.0283	1.49419	0.565284	2.64326	0.0082112	0.100881	14998	H2-DMa
181.799	1.49142	0.443851	3.36018	0.000778929	0.0189619	81489	Dnajb1
1102.05	1.48843	0.221569	6.71771	1.84608e-11	4.70623e-09	15251	Hif1a
33.6106	1.48808	0.460319	3.23272	0.00122616	0.0264158	73075	Ppil6
146.235	1.48386	0.356058	4.16747	3.07998e-05	0.00157036	71529	Kazn
34.4159	1.48283	0.414819	3.57465	0.0003507	0.0106575	110637	Grik4
70.9675	1.48254	0.509123	2.91194	0.00359189	0.0583969	20983	Syt4
108.777	1.48132	0.357009	4.14927	3.33544e-05	0.00165019	52250	Reep1
908.405	1.48088	0.470292	3.14885	0.00163916	0.0328817	233744	Spon1
169.483	1.47626	0.341461	4.32337	1.53664e-05	0.000896626	319468	Ppm1h
224.79	1.47212	0.51379	2.86523	0.00416713	0.0646557	NA	Fam84b
302.321	1.47166	0.555108	2.65112	0.00802247	0.0992268	26950	Vsnl1
263.064	1.47071	0.322842	4.55553	5.22548e-06	0.00036331	14389	Gab2
186.512	1.46769	0.444056	3.30519	0.000949107	0.0219683	21367	Cntn2
38.2285	1.46476	0.471797	3.10464	0.00190509	0.0368083	54610	Tbc1d8
231.515	1.46145	0.445497	3.2805	0.00103625	0.0232807	70380	Mospd1
72.424	1.45696	0.507517	2.87076	0.00409486	0.0639956	12484	Cd24a
28.6267	1.45291	0.40683	3.5713	0.000355212	0.0107589	544678	Cfap74
109.397	1.45169	0.413705	3.50899	0.000449808	0.0127608	30049	Scd3
97.1052	1.45023	0.424484	3.41645	0.00063444	0.0163097	56309	Mycbp
187.258	1.44574	0.44658	3.23736	0.0012064	0.0261125	67731	Fbxo32
95.3951	1.44269	0.430356	3.35232	0.000801384	0.01938	76491	Abhd14b
332.407	1.43988	0.421606	3.41524	0.000637268	0.0163574	108079	Prkaa2
354.688	1.43816	0.494849	2.90627	0.00365763	0.0592026	319636	Fsd1l
429.477	1.43808	0.362977	3.96189	7.43575e-05	0.00322656	17988	Ndrg1
62.1362	1.43633	0.399881	3.59189	0.000328285	0.0101442	21809	Tgfb3
10.5485	1.43384	0.550064	2.60668	0.00914249	0.10709	27221	Chaf1a
48.6832	1.42543	0.473586	3.00986	0.00261367	0.0461732	77976	Nuak1
595.452	1.4192	0.521107	2.72344	0.00646064	0.0871178	320111	Prr18
194.859	1.41838	0.497995	2.84819	0.00439693	0.0671427	11861	Arl4a
402.349	1.40692	0.319073	4.40939	1.03661e-05	0.000651609	320244	Ttll5
85.3173	1.40658	0.411138	3.42119	0.000623477	0.0160886	54324	Arhgef5
17.6396	1.39987	0.528494	2.64879	0.00807811	0.0995223	52231	Ankzf1
151.325	1.39726	0.42668	3.27472	0.00105765	0.0236482	329252	Lgr6
174.636	1.39227	0.423994	3.28371	0.00102451	0.0230654	17342	Mitf
960.52	1.38484	0.281923	4.91212	9.00949e-07	7.95044e-05	320365	Fry
122.396	1.37523	0.49232	2.79336	0.00521631	0.0755699	67801	Pllp
64.1073	1.37182	0.431392	3.17998	0.00147284	0.0303753	22418	Wnt5a
1106.43	1.37108	0.334524	4.09861	4.15641e-05	0.00200239	215789	Phactr2
90.0273	1.36943	0.525952	2.60372	0.00922167	0.107811	17921	Myo7a
630.411	1.36793	0.460191	2.97252	0.00295362	0.0509048	22041	Trf
101.207	1.36376	0.412496	3.30611	0.000946012	0.0219243	77771	Csrnp3
28.1042	1.36143	0.40107	3.39451	0.000687518	0.0174159	NA	Fam69b
598.165	1.36123	0.473205	2.87662	0.00401957	0.0633251	66425	Pcp4l1
86.145	1.36042	0.517926	2.62666	0.00862262	0.103579	226162	Dpcd
64.6799	1.35898	0.418952	3.24377	0.00117959	0.0257449	231148	Ablim2
75.0235	1.35703	0.436981	3.10548	0.00189973	0.0367436	329152	Hecw2
46.7047	1.35102	0.360354	3.74915	0.000177437	0.00636106	12190	Brca2
649	1.35022	0.513445	2.62973	0.00854532	0.102987	74051	Steap2
7111.39	1.34889	0.308085	4.37831	1.19601e-05	0.000726911	18823	Plp1
46.917	1.3485	0.399056	3.37924	0.000726869	0.018005	12035	Bcat1
292.342	1.34602	0.372591	3.61261	0.000303136	0.00956024	382236	Brwd3
602.655	1.34459	0.425753	3.15814	0.00158778	0.0321483	110639	Prps2
151.278	1.33909	0.388448	3.44728	0.00056627	0.0150418	103140	Gstt3
44.5301	1.33331	0.421154	3.16584	0.00154635	0.031467	231440	Parm1
237.045	1.33197	0.404243	3.29498	0.000984302	0.0224502	320478	Sox2ot
269.647	1.33196	0.512469	2.59911	0.00934662	0.108787	68178	Cgnl1
162.783	1.33134	0.392346	3.39328	0.000690611	0.0174159	11514	Adcy8
173.635	1.33029	0.398907	3.33483	0.000853524	0.0202933	333639	Mamld1
69.7644	1.32637	0.39136	3.38914	0.000701119	0.0176047	121022	Mrps6
208.325	1.31834	0.382177	3.44955	0.000561518	0.0149589	19024	Ppfibp2
55.2323	1.31832	0.360064	3.66136	0.000250878	0.00837757	22223	Uchl1
379.009	1.31631	0.451932	2.91264	0.00358387	0.0583691	101565	Ccp110
257.66	1.31559	0.32596	4.03606	5.43557e-05	0.00249425	68070	Pdzd2
22.267	1.31112	0.465923	2.81403	0.0048924	0.0722445	27883	Tango2
117.418	1.30803	0.441934	2.95978	0.00307862	0.052468	14081	Acsl1
46.7551	1.30379	0.434434	3.00112	0.00268991	0.047112	225049	Ttc7
26.2978	1.30138	0.485744	2.67915	0.0073809	0.0942773	22323	Vasp
62.2917	1.29615	0.393354	3.29512	0.000983813	0.0224502	654795	Sdr39u1
122.404	1.29534	0.388932	3.33051	0.000866863	0.0204958	320705	Bend6
489.709	1.29313	0.359557	3.59645	0.000322588	0.0100188	105727	Slc38a1
86.0304	1.28873	0.325711	3.95667	7.60033e-05	0.00327474	227696	Phyhd1
26.2984	1.28795	0.456409	2.82191	0.00477379	0.0711803	269997	Zfp747
273.746	1.28772	0.422174	3.0502	0.00228687	0.0419335	226856	Lpgat1
430.273	1.28702	0.380075	3.38624	0.000708571	0.0177408	77446	Heg1
30.4986	1.28259	0.356948	3.5932	0.000326638	0.0101104	104346	Gas8
171.919	1.28213	0.275917	4.64679	3.37146e-06	0.000250539	20404	Sh3gl2
47.4684	1.28011	0.476982	2.68378	0.00727953	0.0936575	226180	Ina
26.2889	1.27507	0.431856	2.95252	0.00315189	0.0533207	20192	Ryr3
860.854	1.27274	0.334015	3.81043	0.000138724	0.00521778	11735	Ank3
116.587	1.27262	0.442626	2.87515	0.00403842	0.0634312	NA	Fam101b
197.492	1.2699	0.341728	3.71611	0.00020231	0.00707036	NA	Epb4.1l3
112.531	1.26545	0.483306	2.61833	0.00883613	0.104569	216363	Rab3ip
443.601	1.26106	0.310249	4.06466	4.81025e-05	0.00224662	16508	Kcnd2
498.373	1.25734	0.275866	4.55778	5.1697e-06	0.000360798	23836	Cdh20
59.4661	1.24832	0.348999	3.57685	0.000347761	0.0106083	20265	Scn1a
125.745	1.23639	0.387722	3.18885	0.00142838	0.029827	330812	Rnf150
33.6948	1.23378	0.40671	3.03356	0.00241686	0.0437058	213402	Armc2
440.058	1.23315	0.22894	5.38637	7.18958e-08	8.3522e-06	231207	Cpeb2
2497.32	1.23119	0.29696	4.14597	3.38381e-05	0.00166514	17755	Map1b
723.626	1.22013	0.42227	2.88946	0.00385902	0.061433	12661	Chl1
186.541	1.21737	0.462335	2.6331	0.00846104	0.102307	71704	Arhgef3
96.4683	1.21391	0.447397	2.71328	0.00666207	0.0888034	223658	Mroh1
56.8627	1.21066	0.375965	3.22015	0.00128123	0.0274092	227525	Dclre1c
32.0374	1.21054	0.378076	3.20184	0.00136553	0.0288759	NA	A730017C20Rik
42.2272	1.20682	0.348359	3.4643	0.000531609	0.0143495	108943	Trmt10a
94.5078	1.20497	0.312807	3.85211	0.000117103	0.00460261	20868	Stk10
360.084	1.2016	0.390959	3.07345	0.00211597	0.0395226	18952	2019-09-04
219.588	1.20046	0.289823	4.14206	3.44196e-05	0.00168472	70152	Mettl7a1
114.342	1.19981	0.269355	4.45437	8.41401e-06	0.000547656	NA	1110004E09Rik
86.0337	1.1997	0.382911	3.13311	0.00172963	0.0340798	214048	Larp1b
159.943	1.19923	0.288673	4.15428	3.26318e-05	0.0016365	246228	Vwa1
54.0436	1.1983	0.383981	3.12072	0.00180407	0.0352273	11812	Apoc1
456.322	1.19809	0.320246	3.74115	0.000183183	0.00653644	53881	Slc5a3
13332.4	1.18079	0.336639	3.50759	0.000452179	0.0128082	14319	Fth1
128.481	1.18059	0.380663	3.10139	0.00192612	0.0370471	217310	Hid1
75.0691	1.17336	0.359994	3.25938	0.00111656	0.0246327	68034	Fam122a
51.58	1.17103	0.423775	2.76333	0.00572151	0.0800987	69090	Ascc1
77.3008	1.17046	0.439805	2.66132	0.00778357	0.0977908	24060	Slc35a1
224.996	1.16486	0.332526	3.50306	0.000459945	0.0129087	16554	Kif13b
171.023	1.16448	0.276087	4.2178	2.46699e-05	0.00131633	104445	Cdc42ep1
36.6239	1.15678	0.343067	3.37189	0.00074655	0.0184179	67489	Ap4b1
91.0869	1.15148	0.434003	2.65317	0.00797396	0.0988932	77864	Ypel2
57.2178	1.14349	0.349221	3.2744	0.00105885	0.0236482	54131	Irf3
80.1376	1.14172	0.369463	3.0902	0.00200021	0.0379667	11810	Apobec1
930.982	1.13662	0.319466	3.55789	0.00037385	0.0111396	16206	Lrig1
44.0608	1.13197	0.422193	2.68116	0.00733668	0.093974	20194	S100a10
388.221	1.13084	0.34906	3.23968	0.00119665	0.0259805	20482	Skil
48.2274	1.12943	0.406993	2.77506	0.00551912	0.0782871	56844	Tssc4
129.825	1.12899	0.394921	2.85876	0.00425296	0.065765	236900	Pdk3
693.904	1.12532	0.345877	3.25353	0.00113981	0.0251154	14745	Lpar1
101.261	1.12157	0.428345	2.61838	0.00883474	0.104569	100705	Acacb
172.612	1.11813	0.372065	3.0052	0.00265409	0.0467075	67694	Ift74
559.847	1.11676	0.415509	2.68769	0.00719473	0.0931306	117600	Srgap1
309.924	1.11243	0.325183	3.42093	0.000624085	0.0160886	192786	Rapgef6
66.4487	1.11211	0.423111	2.6284	0.00857874	0.103254	27403	Abca7
85.7532	1.10613	0.40489	2.73192	0.0062967	0.0857388	56471	Stmn4
1605.46	1.10559	0.270044	4.0941	4.23811e-05	0.0020364	29876	Clic4
65.1636	1.10283	0.334396	3.29797	0.000973863	0.0223162	78244	Dnajc21
325.65	1.09984	0.379552	2.89773	0.00375874	0.060413	14719	Got2
749.729	1.08711	0.316284	3.43714	0.000587883	0.015488	52840	Dbndd2
310.673	1.08539	0.226909	4.78338	1.72368e-06	0.000142514	108927	Lhfp
300.86	1.08416	0.373096	2.90585	0.00366259	0.0592307	14763	Gpr37
202.81	1.08267	0.330487	3.27599	0.00105294	0.0235979	52389	Adgra1
55.4683	1.07364	0.334092	3.21362	0.00131072	0.0279602	67993	Nudt12
510.362	1.06902	0.321247	3.32774	0.000875545	0.0206563	19659	Rbp1
235.27	1.06611	0.328357	3.24679	0.00116713	0.0255641	22249	Unc13b
613.547	1.06412	0.304333	3.49658	0.000471271	0.0131662	11951	Atp5g1
770.046	1.06339	0.315639	3.369	0.000754426	0.0185118	13132	Dab2
445.541	1.0628	0.279025	3.80897	0.000139545	0.00523793	16979	Lrrn1
95.0434	1.05543	0.404272	2.6107	0.00903562	0.106313	192678	Rassf3
374.371	1.05268	0.281496	3.7396	0.000184313	0.00655633	170768	Pfkfb3
270.538	1.05259	0.253054	4.15955	3.18868e-05	0.00160792	216274	Cep290
27.1599	1.0502	0.403863	2.60038	0.00931207	0.108523	17083	Tmed1
221.261	1.04699	0.28939	3.61793	0.000296965	0.00943043	170676	Peg10
107.192	1.04013	0.312195	3.33167	0.000863267	0.0204455	NA	Epb4.1
56.3203	1.0385	0.386271	2.68853	0.00717684	0.0930819	18019	Nfatc2
2145.2	1.03789	0.366524	2.83171	0.00463002	0.0696019	227937	Pkp4
712.164	1.03675	0.371251	2.79259	0.00522875	0.0755699	214459	Fnbp1l
696.277	1.03374	0.331741	3.1161	0.00183261	0.0356329	12494	Cd38
748.034	1.03327	0.274996	3.75741	0.000171679	0.00622762	19309	Pygm
354.356	1.03151	0.210413	4.90231	9.47168e-07	8.23946e-05	74206	Sipa1l3
72.5169	1.03008	0.397219	2.59322	0.00950815	0.110387	80707	Wwox
99.3728	1.02856	0.270909	3.79669	0.000146639	0.00547066	72108	Ddhd2
227.791	1.02591	0.341151	3.00721	0.00263659	0.0464439	68957	Paqr6
717.803	1.02174	0.214901	4.75446	1.98976e-06	0.00016089	226251	Ablim1
75.7273	1.02113	0.3811	2.67943	0.00737474	0.0942642	252966	Cables2
3520.78	1.02078	0.326474	3.12668	0.00176791	0.0346688	631990	Cdr1
36.4522	1.02009	0.365263	2.79277	0.00522587	0.0755699	59001	Pole3
155.336	1.01993	0.245027	4.16255	3.14716e-05	0.00159135	66522	Pgpep1
126.125	1.01955	0.378911	2.69073	0.00712954	0.0928752	52013	R3hcc1l
165.945	1.01854	0.385877	2.63956	0.00830147	0.101352	73442	Hspa12a
245.985	1.0146	0.344344	2.94648	0.00321409	0.0538763	66948	Acad8
62.4935	1.01351	0.302527	3.35013	0.000807723	0.0194718	12069	Bex2
42.8331	1.01338	0.327838	3.09109	0.00199422	0.0378923	245902	Ccdc15
277.599	1.01173	0.348493	2.90316	0.00369419	0.0595842	382090	Cep162
163.268	1.00896	0.303318	3.3264	0.000879742	0.0207287	27008	Micall1
99.2983	1.00714	0.330971	3.04298	0.00234245	0.042758	74895	Ccdc181
53.283	1.0051	0.295231	3.40446	0.000662952	0.0169242	70153	2210016F16Rik
327.459	1.00269	0.259581	3.86271	0.000112134	0.00443583	14718	Got1
69.6462	1.00236	0.375523	2.66923	0.00760257	0.0960393	80837	Rhoj
183.146	0.997925	0.339833	2.93652	0.00331921	0.0551848	14266	Aff2
441.552	0.993123	0.2419	4.10552	4.03409e-05	0.00195371	223739	5031439G07Rik
858.397	0.99282	0.356739	2.78304	0.00538525	0.0771031	70892	Ttll7
46.9547	0.99259	0.384926	2.57865	0.00991864	0.113785	19893	Rpgr
102.454	0.99071	0.336717	2.94226	0.00325826	0.0545171	327655	Ppip5k1
49.9286	0.990053	0.374741	2.64197	0.00824254	0.101131	79196	Osbpl5
90.4548	0.988522	0.297529	3.32244	0.000892339	0.0209449	56533	Rgs17
36.9237	0.987286	0.36696	2.69045	0.00713564	0.0928752	98402	Sh3bp4
496.193	0.985365	0.287954	3.42195	0.000621739	0.0160886	74480	Samd4
28.7959	0.983887	0.367485	2.67735	0.00742063	0.0946518	16906	Lmnb1
106.307	0.983022	0.380638	2.58257	0.00980685	0.112644	58233	Dnaja4
559.215	0.981858	0.328851	2.98572	0.00282908	0.0489885	105445	Dock9
143.973	0.977426	0.327001	2.98906	0.00279836	0.048594	117606	Boc
80.8442	0.966124	0.29625	3.26118	0.00110951	0.0245361	227731	Slc25a25
350.517	0.963059	0.368016	2.6169	0.0088733	0.104874	76886	Fam81a
95.9106	0.961788	0.336649	2.85694	0.00427744	0.0660323	74761	Mxra8
283.414	0.958324	0.367606	2.60694	0.00913566	0.107079	16889	Lipa
462.679	0.955645	0.307968	3.10307	0.00191527	0.0369272	108737	Oxsr1
117.865	0.946865	0.247395	3.82734	0.000129535	0.00498451	16172	Il17ra
189.047	0.943114	0.296456	3.18129	0.0014662	0.0303064	117160	Ttyh2
347.224	0.941434	0.207042	4.54707	5.43979e-06	0.000375366	244745	Dpy19l1
1276.51	0.940775	0.295064	3.18838	0.00143074	0.0298297	14756	Gpld1
90.388	0.937081	0.294273	3.1844	0.00145055	0.0300506	226823	Kctd3
75.5668	0.935646	0.352236	2.6563	0.00790034	0.0985127	20174	Ruvbl2
106.831	0.924374	0.27934	3.30913	0.000935853	0.0217713	11992	Auh
165.661	0.923118	0.339507	2.719	0.00654798	0.0878569	17127	Smad3
91.9146	0.922958	0.339655	2.71734	0.00658093	0.0880415	241494	Zfp385b
92.1596	0.921181	0.344683	2.67254	0.00752792	0.0954906	108903	Tbcd
107.521	0.917862	0.309304	2.96751	0.00300225	0.0516275	21985	Tpd52
32.2267	0.91567	0.344635	2.65693	0.0078857	0.0985127	68708	Rabl2
866.289	0.914688	0.310055	2.95009	0.00317686	0.0534965	15259	Hipk3
4427.01	0.913421	0.239246	3.81791	0.000134587	0.00512521	27276	Plekhb1
910.095	0.913323	0.255925	3.56871	0.000358737	0.01083	225724	Mapk4
140.409	0.913169	0.318562	2.86653	0.00414999	0.0645535	103080	2019-09-10
125.931	0.912648	0.324799	2.80988	0.00495599	0.0729488	233824	Cog7
465.235	0.910552	0.299873	3.03646	0.00239374	0.0434161	NA	Fam73a
562.932	0.909712	0.245601	3.70403	0.000212203	0.00730768	71279	Slc29a3
36.0946	0.906465	0.331401	2.73525	0.00623326	0.0850644	212919	Kctd7
859.532	0.906265	0.254366	3.56284	0.000366865	0.0109943	72349	Dusp3
70.1021	0.903058	0.299431	3.01591	0.00256205	0.0455683	20520	Slc22a5
89.8857	0.900756	0.323441	2.78491	0.00535424	0.076779	22213	Ube2g2
649.149	0.897856	0.209213	4.29159	1.77401e-05	0.00101439	99526	Usp53
359.024	0.897622	0.273377	3.28346	0.00102541	0.0230654	76179	Usp31
158.151	0.895542	0.247127	3.62382	0.000290286	0.00929879	54447	Asah2
110.058	0.895404	0.306144	2.92479	0.00344693	0.056743	52184	Odf2l
1527.32	0.894856	0.261582	3.42095	0.000624039	0.0160886	20614	Snap25
63.1034	0.89311	0.318274	2.8061	0.00501444	0.0734558	70025	Acot7
642.217	0.889928	0.243239	3.65865	0.000253547	0.00839718	229603	Otud7b
169.967	0.888707	0.334252	2.65879	0.0078421	0.0983881	237339	L3mbtl3
673.456	0.888022	0.332365	2.67183	0.00754388	0.0954951	235380	Dmxl2
1129.02	0.887301	0.243091	3.65007	0.000262167	0.00857768	234663	Dync1li2
366.313	0.883591	0.216628	4.07884	4.52619e-05	0.00213569	104923	Adi1
53.3399	0.87646	0.321591	2.72539	0.00642262	0.0868734	73062	Ppp1r16a
138.92	0.875978	0.329753	2.65647	0.00789642	0.0985127	68295	Aar2
149.868	0.87229	0.247299	3.52728	0.000419859	0.0121363	27528	Nrep
133.371	0.869594	0.280408	3.10118	0.00192754	0.0370471	217837	Itpk1
217.89	0.868762	0.272626	3.18665	0.00143931	0.0299191	77938	Fam53b
110.747	0.868094	0.3237	2.68179	0.00732304	0.0939303	232232	Hdac11
211.444	0.867606	0.333707	2.5999	0.00932498	0.108604	18798	Plcb4
119.109	0.867416	0.281053	3.0863	0.00202664	0.0383494	230259	E130308A19Rik
23138.5	0.863743	0.266674	3.23895	0.0011997	0.0259982	11932	Atp1b2
210.593	0.863608	0.274303	3.14838	0.0016418	0.0328987	67488	Calcoco1
423.805	0.863264	0.32209	2.68019	0.00735794	0.0941806	56224	Tspan5
106.513	0.860617	0.222252	3.87225	0.000107834	0.00432161	66291	Smim8
161.539	0.858215	0.267912	3.20334	0.00135842	0.0288252	78506	Micu3
320.858	0.852426	0.279361	3.05134	0.00227823	0.0419007	14660	Gls
115.268	0.849569	0.323806	2.6237	0.00869807	0.103805	13807	Eno2
56.0233	0.847895	0.324276	2.61473	0.00892978	0.105406	72345	Amer1
220.744	0.847587	0.285787	2.9658	0.00301897	0.051788	26364	Adgre5
202.324	0.838571	0.291356	2.87816	0.00399998	0.0631294	226744	Cnst
124.004	0.834535	0.240209	3.4742	0.000512382	0.0139744	16980	Lrrn2
199.834	0.833605	0.265017	3.14547	0.00165818	0.0330276	13728	Mark2
227.638	0.833379	0.319464	2.60868	0.00908927	0.106739	20019	Polr1a
695.354	0.832769	0.211768	3.93247	8.40775e-05	0.00353955	18616	Peg3
85.3061	0.828732	0.270807	3.06023	0.00221165	0.0409222	66734	Map1lc3a
114.481	0.828494	0.259657	3.19073	0.00141915	0.0297557	22184	Zrsr2
162.793	0.827074	0.266688	3.10127	0.00192691	0.0370471	66860	Tanc1
1739.98	0.825225	0.289828	2.8473	0.00440921	0.0672184	56431	Dstn
204.606	0.824973	0.226731	3.63855	0.000274178	0.00890715	16969	Zbtb7a
179.275	0.815199	0.294338	2.7696	0.00561254	0.0790624	237336	Tbpl1
817.586	0.810054	0.264592	3.06152	0.00220217	0.0407879	217893	Pacs2
334.919	0.809975	0.269624	3.00409	0.00266374	0.0468291	11787	Apbb2
225.209	0.809521	0.243706	3.32171	0.000894674	0.0209728	26400	Map2k7
1094.77	0.805488	0.30826	2.61302	0.00897463	0.105736	18718	Pip4k2a
348.558	0.804964	0.225682	3.56681	0.000361357	0.0108911	53376	Usp2
92.1854	0.803386	0.294755	2.7256	0.00641844	0.0868734	433956	Dnaaf5
3131.05	0.800607	0.274823	2.91317	0.00357782	0.0583223	74340	Ahcyl2
174.959	0.793559	0.275983	2.87539	0.00403527	0.0634312	214952	Rhot2
188.493	0.793313	0.258607	3.06764	0.00215755	0.0401234	227707	BC005624
123.877	0.793223	0.23361	3.3955	0.000685039	0.0173913	30935	Tor3a
144.707	0.789448	0.275212	2.86851	0.00412412	0.0642054	216831	Arhgap44
82.907	0.788229	0.281787	2.79725	0.00515391	0.0750197	56046	Uqcc1
494.228	0.78365	0.220235	3.55824	0.000373348	0.0111396	50772	Mapk6
141.584	0.778698	0.249727	3.11819	0.00181964	0.0354935	14148	Fdx1
256.198	0.77752	0.18517	4.19895	2.68161e-05	0.00140231	219249	Tdrd3
168.239	0.774067	0.271915	2.84673	0.00441715	0.0672836	76219	Arxes1
137.817	0.767925	0.259317	2.96133	0.00306309	0.0523491	192287	Slc25a36
102.998	0.766311	0.264974	2.89202	0.00382771	0.0612687	227210	Ccnyl1
165.56	0.766234	0.276395	2.77224	0.00556721	0.0786048	57080	Gtf2ird1
91.9579	0.763358	0.274394	2.78198	0.00540287	0.0772914	107435	Hat1
665.889	0.760317	0.225969	3.3647	0.000766267	0.0187281	18263	Odc1
353.524	0.759951	0.202515	3.75258	0.000175027	0.00631164	53896	Slc7a10
586.181	0.759702	0.199667	3.80485	0.000141887	0.00531499	69538	Antxr1
570.474	0.759035	0.162668	4.66617	3.06869e-06	0.000230844	102866	Pls3
473.079	0.753845	0.231209	3.26044	0.00111238	0.02457	14677	Gnai1
1838.02	0.752549	0.251024	2.99791	0.00271835	0.047429	19206	Ptch1
181.681	0.75205	0.285184	2.63707	0.00836263	0.101525	16765	Stmn1
1223.28	-0.750015	0.17993	-4.16838	3.06775e-05	0.00157036	94040	Clmn
184.93	-0.750161	0.24715	-3.03524	0.00240344	0.043506	13992	Khdrbs3
4827.95	-0.750773	0.277886	-2.70173	0.00689795	0.0908916	50876	Tmod2
985.839	-0.751744	0.277373	-2.71022	0.00672378	0.0893017	11658	Alcam
65.578	-0.753087	0.277548	-2.71336	0.00666042	0.0888034	212679	Mars2
210.501	-0.754366	0.208544	-3.6173	0.000297698	0.00943738	227449	Zcchc2
1831.55	-0.755462	0.260249	-2.90284	0.00369799	0.0595932	21417	Zeb1
327.244	-0.755762	0.245104	-3.08343	0.00204626	0.0386132	16656	Hivep3
2548.22	-0.757228	0.273573	-2.76792	0.00564152	0.0794096	75104	Mmd2
3084.76	-0.762346	0.264008	-2.88759	0.00388208	0.0615864	75786	Ckap5
2032.09	-0.763701	0.229745	-3.32413	0.000886951	0.0208718	56473	Fads2
1417.53	-0.764951	0.218125	-3.50693	0.000453304	0.0128147	69786	Tprkb
1486.16	-0.771991	0.242795	-3.1796	0.00147477	0.0303808	19270	Ptprg
373.011	-0.772091	0.224767	-3.43507	0.000592392	0.0155779	67247	2019-03-02
289.944	-0.773715	0.277993	-2.78322	0.00538226	0.0771031	18596	Pdgfrb
148.544	-0.774182	0.261876	-2.95629	0.00311363	0.0528195	70082	Lysmd2
373.192	-0.778114	0.208586	-3.73042	0.000191161	0.00676062	241308	Ralgps1
729.312	-0.783363	0.148191	-5.28617	1.24902e-07	1.34858e-05	11308	Abi1
93.263	-0.783802	0.302435	-2.59164	0.00955195	0.110498	56199	Abcb10
215.389	-0.784369	0.295977	-2.65011	0.00804666	0.099392	77041	Arsk
168.979	-0.786879	0.283283	-2.77771	0.0054743	0.0779782	66461	Ptpmt1
169.383	-0.789204	0.272964	-2.89124	0.00383729	0.061294	13617	Ednra
4176.71	-0.790148	0.258895	-3.052	0.00227321	0.0418504	239857	Cadm2
504.349	-0.792468	0.247476	-3.2022	0.00136384	0.0288735	329735	4933431E20Rik
150.156	-0.792503	0.21893	-3.6199	0.000294716	0.00937523	66840	Wdr45b
2899.3	-0.793585	0.204033	-3.8895	0.000100452	0.00406122	27360	Add3
727.965	-0.794102	0.29508	-2.69114	0.00712076	0.0928278	74189	Phactr3
171.467	-0.79845	0.286195	-2.78988	0.00527279	0.0760866	66569	Gdpd1
434.497	-0.804103	0.193643	-4.1525	3.28869e-05	0.0016448	217517	Stxbp6
1425.09	-0.804745	0.264819	-3.03885	0.00237484	0.0432442	77569	Limch1
149.707	-0.805172	0.272087	-2.95924	0.00308396	0.0525103	18483	Palm
388.883	-0.811696	0.213016	-3.81049	0.00013869	0.00521778	216874	Camta2
1998.7	-0.813083	0.299742	-2.71261	0.00667555	0.0889186	103978	Gpc5
705.652	-0.81382	0.227941	-3.5703	0.000356566	0.0107822	50768	Dlc1
1104.61	-0.813953	0.203655	-3.99672	6.42272e-05	0.00285446	100039795	Ildr2
365.333	-0.814091	0.202415	-4.0219	5.77317e-05	0.00262293	12400	Cbfb
419.72	-0.815492	0.256303	-3.18175	0.00146387	0.0302923	19414	Rasa3
241.19	-0.816957	0.249863	-3.26962	0.00107691	0.0239596	241727	Snph
186.88	-0.817614	0.271624	-3.0101	0.00261164	0.0461732	66277	Klf15
196.161	-0.818804	0.196298	-4.17123	3.02953e-05	0.001562	94353	Hmgn3
274.841	-0.820031	0.211184	-3.88302	0.000103165	0.00415386	30791	Slc39a1
445.263	-0.82024	0.228997	-3.58188	0.000341124	0.0104356	11717	Ampd3
1514.65	-0.822543	0.235847	-3.48762	0.000487344	0.0134426	328949	Mcc
323.547	-0.822995	0.251863	-3.26763	0.00108452	0.0240706	19013	Ppara
129.918	-0.823604	0.262882	-3.13297	0.00173045	0.0340798	68219	Nudt21
535.669	-0.825701	0.210165	-3.92883	8.53606e-05	0.00356089	23947	Mid2
3657.43	-0.827301	0.233398	-3.5446	0.000393212	0.0115849	68166	Spire1
792.261	-0.829193	0.188949	-4.38844	1.14168e-05	0.000705572	330401	Tmcc1
1205.12	-0.833505	0.235823	-3.53445	0.000408632	0.0118866	57874	Hacd3
222.578	-0.833682	0.288607	-2.88864	0.00386911	0.0614516	16531	Kcnma1
443.628	-0.834923	0.252351	-3.30858	0.000937714	0.021787	23908	Hs2st1
1595.83	-0.834934	0.203689	-4.09905	4.14846e-05	0.00200239	104776	Aldh6a1
218.529	-0.837574	0.296137	-2.82834	0.00467906	0.0701669	53330	Vamp4
230.172	-0.83929	0.261405	-3.21069	0.00132418	0.0281637	14700	Gng10
1902.26	-0.841281	0.320358	-2.62606	0.00863793	0.103627	12558	Cdh2
301.63	-0.846722	0.277073	-3.05595	0.00224345	0.0414065	20418	Shc3
1157.71	-0.850909	0.305891	-2.78174	0.00540682	0.0772914	56741	Igdcc4
281.671	-0.851832	0.275424	-3.09281	0.00198273	0.0377521	66622	Ubr7
134.752	-0.854765	0.278079	-3.07382	0.0021134	0.0395226	241576	Ldlrad3
8042.31	-0.855651	0.219564	-3.89705	9.73735e-05	0.0039806	11855	Arhgap5
794.879	-0.858187	0.302871	-2.83351	0.00460402	0.0692678	245537	Nlgn3
363.953	-0.861425	0.232478	-3.70541	0.00021105	0.00729533	232533	Stk38l
2909.98	-0.86263	0.257035	-3.35608	0.000790547	0.0191684	67579	Cpeb4
957.54	-0.863849	0.304781	-2.83433	0.00459222	0.069147	12444	Ccnd2
649.23	-0.865932	0.222407	-3.89346	9.8824e-05	0.00402198	17859	Mxi1
1601.29	-0.866172	0.225646	-3.83863	0.000123725	0.00482158	78787	Usp54
396.093	-0.86692	0.218498	-3.96764	7.2589e-05	0.00316478	58198	Sall1
1945.99	-0.868425	0.237325	-3.65923	0.000252975	0.00839667	54418	Fmn2
302.845	-0.87162	0.297857	-2.9263	0.00343015	0.056619	18802	Plcd4
408.002	-0.872304	0.310305	-2.81112	0.00493696	0.072727	11784	Apba2
763.741	-0.873091	0.257312	-3.39312	0.000691002	0.0174159	105859	Csdc2
677.746	-0.873802	0.339228	-2.57585	0.00999935	0.114354	20238	Atxn1
1945.41	-0.875574	0.274704	-3.18733	0.00143593	0.0298827	68801	Elovl5
97.7179	-0.876653	0.319263	-2.74587	0.00603515	0.0830399	50997	Mpp2
535.143	-0.87726	0.23568	-3.72225	0.000197453	0.006943	75605	Kdm5b
149.684	-0.878745	0.322003	-2.729	0.00635271	0.0861181	245666	Iqsec2
322.633	-0.878778	0.256075	-3.43172	0.000599772	0.0157494	67860	S100a16
1784.65	-0.880408	0.228629	-3.85082	0.000117724	0.00461713	18514	Pbx1
468.662	-0.881803	0.244366	-3.60854	0.000307929	0.00964511	108960	Irak2
224.986	-0.88298	0.324892	-2.71777	0.00657242	0.0880415	64339	Fndc4
1205.04	-0.884375	0.22718	-3.89283	9.90802e-05	0.00402349	18145	Npc1
335.315	-0.884492	0.275724	-3.20788	0.00133716	0.028407	16911	Lmo4
546.802	-0.886594	0.235775	-3.76035	0.000169678	0.00617943	110279	Bcr
141.508	-0.88687	0.290686	-3.05095	0.00228119	0.0419131	67702	Rnf149
131.317	-0.887101	0.268054	-3.30941	0.000934923	0.0217713	21767	Tex264
99.0559	-0.88952	0.292895	-3.03699	0.0023895	0.0433821	268739	Arhgef40
131.875	-0.89	0.305757	-2.91081	0.00360497	0.0585569	241274	Pnpla7
1753.81	-0.89225	0.231429	-3.8554	0.000115543	0.00455104	NA	Epb4.1l2
920.39	-0.895517	0.302906	-2.95642	0.0031123	0.0528195	57266	Cxcl14
589.796	-0.896249	0.34168	-2.62306	0.00871437	0.103805	23859	Dlg2
199.095	-0.896816	0.233777	-3.8362	0.00012495	0.00484876	69310	Pacrg
597.926	-0.900498	0.227549	-3.95737	7.57785e-05	0.00327274	58250	Chst11
84.695	-0.902991	0.298041	-3.02975	0.00244754	0.0440006	19300	Abcd4
4314.76	-0.903211	0.242887	-3.71865	0.000200288	0.00702924	13527	Dtna
5021.11	-0.906079	0.209592	-4.32307	1.53875e-05	0.000896626	319555	Nwd1
143.789	-0.911568	0.23825	-3.8261	0.000130191	0.00499927	68087	Dcakd
1017.13	-0.912632	0.27105	-3.36702	0.000759849	0.018596	66988	Lap3
315.22	-0.914189	0.239587	-3.81569	0.000135804	0.00514301	320878	Mical2
179.893	-0.914619	0.25133	-3.63912	0.00027357	0.00890316	72333	Palld
191.889	-0.915232	0.309362	-2.95845	0.00309187	0.0525962	74245	Ctbs
624.247	-0.916749	0.302256	-3.03302	0.0024212	0.043737	20674	Sox2
261.21	-0.917357	0.338255	-2.71203	0.00668735	0.0889466	319156	Hist1h4d
6614.9	-0.918631	0.282924	-3.24692	0.00116662	0.0255641	118452	Baalc
711.051	-0.919247	0.30744	-2.99001	0.0027897	0.0485355	14057	Sfxn1
1731.13	-0.919499	0.310933	-2.95723	0.00310421	0.0527573	235106	Ntm
363.428	-0.921481	0.319511	-2.88404	0.00392612	0.0620705	735274	Mir684-1
100.94	-0.922712	0.335273	-2.75212	0.00592101	0.0817144	58248	1700123O20Rik
575.514	-0.924393	0.300868	-3.07242	0.00212334	0.0396076	19944	Rpl29
2872.67	-0.926281	0.218256	-4.24401	2.19562e-05	0.00119586	259302	Srgap3
1090.78	-0.927395	0.35168	-2.63705	0.00836316	0.101525	12361	Cask
216.336	-0.927578	0.26452	-3.50664	0.000453802	0.0128147	79221	Hdac9
819.741	-0.929681	0.320744	-2.89851	0.0037494	0.0603158	74901	Kbtbd11
196.083	-0.930785	0.308001	-3.02202	0.00251097	0.0447623	67888	Tmem100
200.917	-0.935259	0.269929	-3.46483	0.000530559	0.0143423	14806	Grik2
327.026	-0.935662	0.201733	-4.63813	3.51581e-06	0.000260212	666060	Frmpd1
1548.7	-0.936452	0.257866	-3.63154	0.000281732	0.00907226	216558	Ugp2
222.231	-0.937449	0.318202	-2.94608	0.0032183	0.0538976	20689	Sall3
3615.44	-0.937988	0.232181	-4.0399	5.34746e-05	0.00246614	11758	Prdx6
402.744	-0.938326	0.222392	-4.21924	2.45126e-05	0.00131633	19248	Ptpn12
106.927	-0.939336	0.286877	-3.27435	0.00105905	0.0236482	217218	Atxn7l3
326.097	-0.947064	0.365685	-2.58984	0.00960218	0.110918	73102	Slc22a23
102.823	-0.94937	0.288393	-3.29193	0.000995026	0.0226036	NA	Papd7
684.701	-0.949751	0.239268	-3.9694	7.20539e-05	0.00314893	668212	Efr3b
104.695	-0.950692	0.298091	-3.18927	0.00142633	0.029818	27801	Zdhhc8
1018.12	-0.950885	0.359183	-2.64735	0.00811247	0.0998688	14199	Fhl1
1012.18	-0.954412	0.362274	-2.6345	0.00842603	0.102086	140493	Kcnn3
255.373	-0.955187	0.301418	-3.16897	0.00152979	0.0313384	18992	Pou3f2
7543.7	-0.956192	0.270663	-3.53278	0.000411214	0.0119428	14862	Gstm1
248.965	-0.95732	0.238467	-4.01447	5.95801e-05	0.00268038	243914	Lgi4
520.475	-0.959091	0.214527	-4.47073	7.79532e-06	0.000514687	13385	Dlg4
2421.04	-0.960951	0.260757	-3.68523	0.000228493	0.0077523	16490	Kcna2
328.746	-0.960982	0.254456	-3.77662	0.000158973	0.0058359	16480	Jup
137.226	-0.963936	0.226186	-4.26169	2.02889e-05	0.00112682	64144	Mllt1
785.364	-0.964268	0.198203	-4.86504	1.14431e-06	9.76921e-05	217692	Sipa1l1
20268.5	-0.965312	0.247374	-3.90223	9.53096e-05	0.00390493	11816	Apoe
49.1742	-0.965655	0.335641	-2.87705	0.00401414	0.0632986	269470	Wdr3
341.75	-0.966351	0.22289	-4.33556	1.45392e-05	0.000858093	227801	Dennd1a
336.543	-0.969787	0.366591	-2.64542	0.00815887	0.100305	230904	Fbxo2
126.736	-0.970348	0.328916	-2.95014	0.00317632	0.0534965	216877	Dhx33
235.641	-0.970532	0.280388	-3.46139	0.000537387	0.0144418	30956	Aass
220.931	-0.97085	0.320929	-3.02512	0.00248533	0.0444623	329540	Nol4l
256.706	-0.975426	0.337402	-2.89099	0.00384027	0.061294	108760	Galnt16
1732.02	-0.978536	0.371544	-2.6337	0.00844603	0.102193	14701	Gng12
1004.72	-0.982339	0.270194	-3.63568	0.00027725	0.00897424	233115	Dpy19l3
419.263	-0.986042	0.222926	-4.42318	9.72585e-06	0.000619854	18569	Pdcd4
1170.19	-0.986276	0.230489	-4.27905	1.87692e-05	0.00105678	75747	Sesn3
445.555	-0.992353	0.239412	-4.14497	3.39864e-05	0.00166797	142682	Zcchc14
1733.34	-0.994695	0.222535	-4.46984	7.82796e-06	0.00051499	234353	Psd3
1282.69	-0.99841	0.249038	-4.00906	6.09598e-05	0.00272243	229445	Ctso
299.82	-0.998508	0.350864	-2.84585	0.00442928	0.0674124	67122	Nrarp
577.751	-0.999006	0.208372	-4.79433	1.63216e-06	0.000136174	NA	Dopey2
1229.72	-0.999284	0.253563	-3.94097	8.11529e-05	0.00344806	74013	Rftn2
635.487	-1.00018	0.285967	-3.49753	0.000469588	0.0131392	11652	Akt2
987.352	-1.00112	0.34149	-2.93162	0.00337201	0.0558357	70417	Megf10
549.27	-1.00249	0.278542	-3.59907	0.000319361	0.00994379	26877	B3galt1
143.807	-1.00316	0.322892	-3.10681	0.0018912	0.036617	242409	Tmem8b
385.684	-1.00464	0.237082	-4.23751	2.26008e-05	0.00122733	13418	Dnajc1
844.888	-1.00507	0.346001	-2.90481	0.00367481	0.0593761	210044	Adcy2
211.152	-1.00751	0.232018	-4.34238	1.40951e-05	0.000837265	70461	Crtc3
649.926	-1.00851	0.278517	-3.621	0.000293464	0.00935162	216881	Wscd1
47.2227	-1.00914	0.359704	-2.80548	0.00502421	0.073488	73254	Ccdc18
831.307	-1.01504	0.384267	-2.6415	0.00825397	0.101204	215114	Hip1
78.1813	-1.02014	0.376951	-2.70628	0.0068041	0.0901419	104394	E2f4
286.513	-1.02389	0.341596	-2.99736	0.00272333	0.0474708	15512	Hspa2
495.59	-1.02484	0.29264	-3.50205	0.000461687	0.0129378	11639	Ak4
33.4846	-1.02754	0.387285	-2.65319	0.00797357	0.0988932	57370	B4galt3
269.613	-1.03044	0.322497	-3.19519	0.00139739	0.0294478	17260	Mef2c
121.955	-1.03358	0.269836	-3.83041	0.000127931	0.00494352	319211	Nol4
517.636	-1.0341	0.292879	-3.53082	0.000414271	0.0120125	108013	Celf4
276.47	-1.03682	0.24406	-4.24824	2.15453e-05	0.00117832	140577	Ankrd6
2518.9	-1.03748	0.298548	-3.4751	0.000510669	0.0139692	94090	Trim9
51.7667	-1.03857	0.35615	-2.9161	0.00354433	0.0579793	57783	Tnip1
333.504	-1.04015	0.336399	-3.092	0.00198812	0.0378155	74100	Arpp21
300.388	-1.0405	0.270278	-3.84976	0.000118233	0.00462539	12053	Bcl6
198.468	-1.04235	0.3003	-3.47105	0.000518434	0.0141185	319190	Hist2h2be
90.3587	-1.04426	0.363789	-2.8705	0.00409821	0.0639956	319783	A730056A06Rik
2999.77	-1.04774	0.245214	-4.27277	1.93057e-05	0.00107707	18163	Ctnnd2
246.577	-1.05096	0.370152	-2.83928	0.00452158	0.0684766	210356	Nckap5
76.1476	-1.05325	0.290861	-3.62114	0.000293304	0.00935162	106489	Sft2d1
135.977	-1.05587	0.300778	-3.51048	0.0004473	0.0127093	105348	Golm1
159.896	-1.05652	0.332998	-3.17274	0.00151008	0.0309693	20443	St3gal4
1976.08	-1.05737	0.270108	-3.91462	9.05483e-05	0.00372837	330260	Pon2
253.015	-1.05747	0.279471	-3.78382	0.000154439	0.00573831	18754	Prkce
920.299	-1.05822	0.188139	-5.62466	1.85879e-08	2.49037e-06	76137	Mcur1
1127.04	-1.05843	0.208219	-5.08326	3.71016e-07	3.54687e-05	226470	Zbtb41
1428.35	-1.05995	0.195869	-5.41153	6.2489e-08	7.49663e-06	19280	Ptprs
84.7653	-1.06295	0.394151	-2.69681	0.00700075	0.0917193	233529	Kctd14
704.509	-1.0663	0.216954	-4.91489	8.88346e-07	7.91533e-05	16975	Lrp8
417.538	-1.06701	0.371583	-2.87153	0.00408492	0.0639749	107022	Gramd3
125.687	-1.06854	0.372832	-2.86602	0.00415669	0.0645758	16981	Lrrn3
196.705	-1.06867	0.309863	-3.44886	0.000562962	0.0149756	241062	Pgap1
1452.11	-1.07252	0.241423	-4.44251	8.89172e-06	0.000570656	320939	5930403L14Rik
1254.13	-1.07331	0.307141	-3.49452	0.000474916	0.0132478	29820	Tnfrsf19
59.9523	-1.07387	0.354278	-3.03116	0.0024362	0.0438676	108897	Aif1l
1055.19	-1.07522	0.295776	-3.63525	0.00027771	0.00897424	16816	Lcat
133.052	-1.07841	0.381926	-2.82362	0.00474849	0.0709127	20341	Selenbp1
3620	-1.08	0.342603	-3.15235	0.00161963	0.0325969	13609	S1pr1
59.2046	-1.08765	0.365554	-2.97536	0.00292644	0.0504838	52897	Rbfox3
1988.82	-1.0877	0.284534	-3.82274	0.000131976	0.00505726	218952	Fermt2
2411.94	-1.0897	0.327211	-3.33027	0.000867623	0.0204958	18526	Pcdh10
271.869	-1.09319	0.260151	-4.20213	2.64415e-05	0.00138667	140721	Caskin2
190.196	-1.09406	0.285843	-3.82747	0.000129467	0.00498451	382056	Crtc1
608.203	-1.09616	0.405062	-2.70616	0.00680668	0.0901419	12890	Cplx2
77.2917	-1.09873	0.42031	-2.61409	0.00894647	0.105535	70350	Basp1
148.679	-1.09893	0.234012	-4.69603	2.6527e-06	0.000202489	101437	Dhx32
730.534	-1.1036	0.249636	-4.42083	9.83247e-06	0.000624481	16423	Cd47
40.0467	-1.11487	0.404118	-2.75878	0.00580168	0.0805126	NA	N6amt2
93.8541	-1.11567	0.408713	-2.72971	0.00633909	0.085997	12583	Cdo1
105.535	-1.11698	0.321989	-3.469	0.000522398	0.0141843	193280	C030037D09Rik
268.395	-1.12062	0.345113	-3.24712	0.00116581	0.0255641	14708	Gng7
612.066	-1.12155	0.215215	-5.21131	1.8751e-07	1.91761e-05	67501	Ccdc50
259.297	-1.12337	0.256371	-4.38182	1.17691e-05	0.000717678	20354	Sema4d
100.863	-1.12409	0.38462	-2.9226	0.0034712	0.0570913	67784	Plxnd1
21591.1	-1.1267	0.34181	-3.29627	0.000979793	0.0224241	19283	Ptprz1
359.917	-1.12895	0.216342	-5.21837	1.80506e-07	1.87186e-05	381668	Fbrsl1
66.5636	-1.12907	0.349635	-3.22927	0.00124107	0.026643	14163	Fgd1
192.18	-1.13043	0.26989	-4.18848	2.80823e-05	0.00146435	242585	Slc35d1
147.385	-1.13542	0.336408	-3.37512	0.000737824	0.0182271	66205	Cd302
51.0504	-1.14006	0.375972	-3.03229	0.00242703	0.0437604	67267	Uqcc2
883.039	-1.14048	0.215224	-5.29905	1.16408e-07	1.2643e-05	14658	Glrb
61.3477	-1.14159	0.380557	-2.99977	0.00270183	0.0471856	NA	Athl1
348.775	-1.14174	0.280942	-4.06396	4.82475e-05	0.00224767	18986	Pou2f1
240.798	-1.14334	0.387709	-2.94897	0.00318832	0.0535422	218476	Gcnt4
61.055	-1.14495	0.407876	-2.8071	0.00499894	0.0733457	17960	Nat1
27460.2	-1.14515	0.242115	-4.72978	2.24763e-06	0.000176305	14758	Gpm6b
66.7228	-1.14573	0.419594	-2.73058	0.00632239	0.0858975	73086	Rps6ka5
38.3813	-1.14757	0.403905	-2.84119	0.00449451	0.0682355	NA	1110008F13Rik
59.2646	-1.14862	0.360576	-3.18552	0.00144492	0.0299678	56323	Dnajb5
182.787	-1.14906	0.35758	-3.21344	0.00131156	0.0279602	330908	Opcml
158.109	-1.14973	0.349605	-3.28864	0.00100673	0.0227882	NA	Tmem180
299.042	-1.15095	0.426761	-2.69695	0.00699782	0.0917193	216616	Efemp1
455.221	-1.1512	0.34248	-3.36137	0.000775567	0.0189051	108089	Rnf144a
410.265	-1.15274	0.274083	-4.2058	2.60164e-05	0.00137221	94212	Pag1
127.896	-1.15671	0.26901	-4.29987	1.70895e-05	0.000983313	18146	Npdc1
4699.28	-1.15773	0.251846	-4.59698	4.28658e-06	0.000307345	21413	Tcf4
867.603	-1.15951	0.227253	-5.10231	3.35538e-07	3.24148e-05	26941	Slc9a3r1
811.211	-1.16103	0.345347	-3.36193	0.000773989	0.0188917	14634	Gli3
2175.06	-1.16206	0.204601	-5.67962	1.34996e-08	1.92081e-06	13175	Dclk1
155.929	-1.16843	0.302086	-3.86787	0.00010979	0.00436438	236920	Stard8
100.04	-1.16945	0.346877	-3.37136	0.000747982	0.0184285	229776	Cdc14a
1153.27	-1.17059	0.366625	-3.19288	0.00140863	0.0296167	23972	Papss2
66.4538	-1.1707	0.341454	-3.42858	0.000606748	0.0158645	97165	Hmgb2
80.3495	-1.17668	0.456802	-2.57592	0.00999745	0.114354	14230	Fkbp10
185.011	-1.18007	0.275113	-4.28939	1.79167e-05	0.00102131	20196	S100a13
383.299	-1.18093	0.412469	-2.86308	0.0041955	0.064986	218454	Lhfpl2
1493.02	-1.18163	0.292027	-4.0463	5.20344e-05	0.00240577	19261	Sirpa
143.65	-1.18369	0.381924	-3.09927	0.00193995	0.0372467	22253	Unc5c
331.834	-1.18488	0.275903	-4.29454	1.75055e-05	0.00100411	381694	B3glct
342.697	-1.1851	0.2149	-5.51466	3.49456e-08	4.45435e-06	240427	Setbp1
95.1384	-1.19095	0.386844	-3.07864	0.00207951	0.0390679	320685	Dctd
399.674	-1.19427	0.224639	-5.31639	1.05847e-07	1.16337e-05	75599	Pcdh1
3164.31	-1.19445	0.29653	-4.02809	5.62311e-05	0.00257387	16011	Igfbp5
537.04	-1.19596	0.273847	-4.36725	1.25819e-05	0.000754708	53860	2019-09-09
1203.84	-1.19845	0.258972	-4.62774	3.69684e-06	0.000271422	97064	Wwtr1
196.253	-1.19987	0.427299	-2.80803	0.00498456	0.0732518	18414	Osmr
191.396	-1.20204	0.262706	-4.5756	4.74846e-06	0.000336517	20440	St6gal1
1318.31	-1.20338	0.27313	-4.40591	1.05343e-05	0.000657674	107272	Psat1
493.247	-1.20368	0.311666	-3.86209	0.000112421	0.00443762	70839	P2ry12
4654.79	-1.20485	0.348367	-3.45855	0.000543084	0.0145735	225998	Rorb
1240.5	-1.20632	0.273903	-4.4042	1.06174e-05	0.000660619	217480	Dgkb
1342.37	-1.20904	0.245629	-4.9222	8.55753e-07	7.66212e-05	93706	Pcdhgc3
496.624	-1.20931	0.360284	-3.35656	0.000789199	0.019161	217265	Abca5
925.902	-1.21275	0.197707	-6.13405	8.56692e-10	1.52666e-07	56458	Foxo1
117.17	-1.21608	0.446555	-2.72324	0.00646442	0.0871178	22240	Dpysl3
8010	-1.22117	0.329028	-3.71144	0.000206084	0.00715061	NA	Ppap2b
76.9713	-1.22168	0.360062	-3.39298	0.000691365	0.0174159	17389	Mmp16
119.295	-1.22659	0.330037	-3.71651	0.000201993	0.00707036	13116	Cyp46a1
158.909	-1.2297	0.285489	-4.30736	1.65212e-05	0.00095887	118449	Synpo2
131.099	-1.23047	0.314326	-3.91464	9.0539e-05	0.00372837	NA	Gm7120
261.438	-1.2386	0.446059	-2.77677	0.00549014	0.0779965	18214	Ddr2
94.9885	-1.23924	0.303915	-4.07758	4.55064e-05	0.00214172	14864	Gstm3
30.8654	-1.24036	0.452096	-2.74358	0.00607737	0.0834332	69895	Snhg8
183.344	-1.24174	0.297939	-4.16778	3.07578e-05	0.00157036	75974	Dock11
636.233	-1.24371	0.172267	-7.21967	5.21131e-13	1.95211e-10	545156	Kalrn
616.158	-1.24612	0.248805	-5.00842	5.48792e-07	5.06185e-05	218194	Phactr1
61.9217	-1.24759	0.475033	-2.62632	0.00863135	0.103616	NA	6030419C18Rik
233.964	-1.24881	0.228148	-5.47368	4.40786e-08	5.50383e-06	100678	Psph
110.683	-1.2626	0.313807	-4.02349	5.73409e-05	0.00261814	627626	Ptchd4
758.764	-1.26497	0.356457	-3.54874	0.000387078	0.0114779	111173	Erc1
147.87	-1.27504	0.411862	-3.0958	0.00196281	0.0374895	68428	Steap3
124.624	-1.27654	0.347532	-3.67317	0.000239564	0.00803875	215999	Mcu
104.473	-1.28162	0.432111	-2.96594	0.00301756	0.051788	78134	Lpar4
37.6788	-1.28238	0.477913	-2.68329	0.00729016	0.0936575	21944	Tnfsf12
15864	-1.2835	0.379311	-3.38376	0.000715012	0.0177834	12759	Clu
71.9525	-1.28467	0.313854	-4.09321	4.25434e-05	0.00203886	66993	Smarcd3
49.4761	-1.2851	0.450388	-2.85333	0.0043264	0.0664729	12569	Cdk5r1
37.8876	-1.28605	0.417096	-3.08334	0.00204689	0.0386132	73390	Msl3l2
587.997	-1.29422	0.469088	-2.75901	0.00579759	0.0805126	22352	Vim
182.172	-1.29795	0.30871	-4.20445	2.61716e-05	0.00137645	319613	Sybu
1767.75	-1.30147	0.197812	-6.57932	4.72609e-11	1.08434e-08	14007	Celf2
1534.08	-1.30391	0.421454	-3.09383	0.00197589	0.0376609	74318	Hopx
41.2318	-1.30619	0.483179	-2.70332	0.00686511	0.0907193	12328	Caml
368.302	-1.30734	0.357647	-3.6554	0.000256782	0.00846184	75625	Mageh1
110.907	-1.309	0.487636	-2.68437	0.0072667	0.0936002	76123	Gpsm2
79.8005	-1.31067	0.384017	-3.41304	0.00064242	0.0164458	72668	Skida1
174.837	-1.31489	0.238498	-5.51321	3.52339e-08	4.46013e-06	11865	Arntl
266608	-1.31552	0.408498	-3.22039	0.00128018	0.0274092	20511	Slc1a2
779.004	-1.31871	0.339614	-3.88295	0.000103196	0.00415386	243961	Shank1
40.8191	-1.31973	0.416961	-3.16512	0.00155016	0.0315072	319653	Slc25a40
2543.6	-1.32056	0.398186	-3.31645	0.000911699	0.0213447	277360	Prex1
1842.74	-1.32697	0.252762	-5.24987	1.52203e-07	1.62424e-05	26570	Slc7a11
95.9922	-1.33655	0.483247	-2.76578	0.00567877	0.0796894	13642	Efnb2
133.225	-1.34109	0.426377	-3.14532	0.00165903	0.0330276	57764	Ntn4
134.196	-1.35092	0.458053	-2.94928	0.0031852	0.0535388	327814	Ppfia2
68.178	-1.3547	0.419161	-3.23193	0.00122959	0.0264585	74762	Mdga1
131.062	-1.35806	0.28584	-4.75112	2.02294e-06	0.000162855	239606	Slc2a13
100.238	-1.36371	0.420297	-3.24465	0.00117596	0.0256962	13830	Stom
189.758	-1.36382	0.369637	-3.68961	0.000224601	0.00763435	384569	Nova2
238.404	-1.3682	0.329577	-4.15138	3.30478e-05	0.00164665	16173	Il18
25.3744	-1.36923	0.519852	-2.63387	0.0084417	0.102193	76220	6530402F18Rik
75.4474	-1.36951	0.435606	-3.14392	0.00166702	0.0331508	74770	Hhatl
79.277	-1.36963	0.402566	-3.40225	0.000668323	0.0170238	17777	Mttp
1715.41	-1.37123	0.247481	-5.54076	3.01157e-08	3.94839e-06	78339	Ttyh3
89.7879	-1.37457	0.308308	-4.45842	8.25671e-06	0.000539331	NA	Gm996
811.544	-1.3777	0.29887	-4.60969	4.03263e-06	0.000291413	114713	Rasa2
40.3072	-1.38174	0.439171	-3.14624	0.00165385	0.0330276	52633	Nit2
130.259	-1.38441	0.319752	-4.32962	1.49366e-05	0.000875915	71801	Plekhf2
31.248	-1.38664	0.521894	-2.65693	0.00788559	0.0985127	320586	A630089N07Rik
86.188	-1.38846	0.391588	-3.54571	0.000391559	0.0115785	207393	Elfn2
2731.29	-1.38974	0.273581	-5.07982	3.77795e-07	3.56407e-05	217082	Hlf
192.351	-1.39442	0.326093	-4.27613	1.90171e-05	0.0010642	17318	Mid1
564.729	-1.39667	0.233444	-5.9829	2.19194e-09	3.59223e-07	14813	Grin2c
86.9939	-1.39918	0.34789	-4.02191	5.7728e-05	0.00262293	52588	Tspan14
944.055	-1.40105	0.297864	-4.70367	2.55532e-06	0.000197902	14182	Fgfr1
1025.09	-1.40855	0.235751	-5.97473	2.30476e-09	3.7437e-07	108735	Sft2d2
409.369	-1.4089	0.300222	-4.69285	2.69427e-06	0.000204352	18190	Nrxn2
123.776	-1.41231	0.508065	-2.77977	0.00543972	0.0776407	629059	Fam124a
95.4708	-1.42338	0.494206	-2.88014	0.00397504	0.0627899	13803	Enc1
48.6309	-1.42794	0.485823	-2.93922	0.00329035	0.054904	110197	Dgkg
693.335	-1.42964	0.277689	-5.14836	2.6277e-07	2.5655e-05	236539	Phgdh
536.03	-1.43045	0.499132	-2.86588	0.00415846	0.0645758	14221	Fjx1
372.958	-1.43091	0.226524	-6.3168	2.67036e-10	5.32766e-08	66214	Rgcc
755.751	-1.43165	0.267077	-5.36042	8.30273e-08	9.52479e-06	24051	Sgcb
46.2055	-1.4339	0.418722	-3.42448	0.000615981	0.0159824	100382	AW011738
473.88	-1.43634	0.315814	-4.54807	5.41398e-06	0.000374995	18993	Pou3f3
33316.9	-1.43701	0.231105	-6.218	5.03519e-10	9.24209e-08	14645	Glul
117.94	-1.43757	0.506204	-2.8399	0.00451272	0.068431	408064	BC064078
15110.2	-1.43804	0.347693	-4.13594	3.5351e-05	0.00172571	233271	Luzp2
71.5974	-1.44094	0.511531	-2.81692	0.0048487	0.0717726	232813	Shisa7
58.6973	-1.44428	0.397586	-3.63262	0.000280558	0.00905033	13841	Epha7
47.0281	-1.44726	0.524641	-2.75858	0.00580531	0.0805126	14811	Grin2a
362.043	-1.44883	0.304248	-4.76198	1.91698e-06	0.000156383	226781	Slc30a10
164.617	-1.44903	0.400735	-3.61592	0.000299278	0.00947113	57265	Fzd2
36.8924	-1.45053	0.417508	-3.47426	0.000512269	0.0139744	28106	Mydgf
267.462	-1.46025	0.306009	-4.77191	1.82483e-06	0.0001502	319660	Agmo
255.057	-1.46097	0.489696	-2.98343	0.0028504	0.0492183	237831	Slc13a5
181.841	-1.46244	0.412977	-3.54121	0.000398298	0.0116627	277396	Klhl23
34.3919	-1.47228	0.531511	-2.76999	0.00560575	0.0790273	434377	Zfp560
193.388	-1.47658	0.456952	-3.23137	0.00123198	0.0264788	12389	Cav1
674.948	-1.47749	0.426806	-3.46173	0.000536713	0.0144418	23888	Gpc6
54.5616	-1.47749	0.356204	-4.14788	3.35563e-05	0.00165571	227102	Ormdl1
480.593	-1.48039	0.242976	-6.09276	1.10983e-09	1.90383e-07	27984	Efhd2
96.2747	-1.48217	0.375259	-3.94972	7.82428e-05	0.00335548	70423	Tspan15
38.7112	-1.48372	0.453564	-3.27124	0.00107079	0.0238523	74319	Mettl23
19.759	-1.48823	0.559812	-2.65844	0.00785031	0.0984237	17391	Mmp24
136.383	-1.48867	0.37795	-3.9388	8.18909e-05	0.00347138	68161	A930005H10Rik
677.473	-1.49145	0.522903	-2.85226	0.00434102	0.0666216	268902	Robo2
58.566	-1.49994	0.535956	-2.79862	0.00513218	0.0747628	320429	Trank1
30.7792	-1.50272	0.570804	-2.63264	0.00847245	0.10231	16467	Atcay
5208.39	-1.50276	0.288676	-5.2057	1.93267e-07	1.9599e-05	69219	Ddah1
50.447	-1.50403	0.399453	-3.76523	0.000166394	0.0060719	NA	Ldoc1l
23.8265	-1.51429	0.571634	-2.64906	0.00807161	0.0995223	232679	Zc3hc1
877.096	-1.51656	0.216274	-7.01221	2.34584e-12	6.72779e-10	74114	Crot
1425.46	-1.51991	0.250557	-6.06611	1.31049e-09	2.22723e-07	13998	Fgd6
206.786	-1.53345	0.43887	-3.49408	0.000475699	0.0132495	17751	Mt3
293.23	-1.53714	0.402749	-3.81661	0.000135297	0.00514156	14048	Eya1
409.246	-1.54454	0.31885	-4.8441	1.27186e-06	0.000108079	56876	Nsmf
72.8538	-1.54996	0.428995	-3.613	0.000302677	0.00956024	11838	Arc
884.158	-1.55114	0.40048	-3.87321	0.000107413	0.00431415	107515	Lgr4
234.445	-1.55843	0.372716	-4.18128	2.89867e-05	0.00150297	73100	2900092D14Rik
473.42	-1.56257	0.3823	-4.0873	4.36421e-05	0.00208065	227485	Cdh19
21490.3	-1.5661	0.220154	-7.11368	1.12992e-12	3.63854e-10	13010	Cst3
367.19	-1.57399	0.44526	-3.535	0.000407782	0.0118807	12217	Bsn
33.4633	-1.59129	0.449425	-3.54073	0.000399029	0.0116627	195733	Grhl1
121.418	-1.592	0.452115	-3.52122	0.000429564	0.012339	12724	Clcn2
184.596	-1.60092	0.373647	-4.28458	1.83086e-05	0.00103721	72792	2810459M11Rik
8127.95	-1.60972	0.304721	-5.28259	1.27371e-07	1.36719e-05	109294	Prex2
179.117	-1.6128	0.343344	-4.69733	2.6358e-06	0.000202489	18951	2019-09-05
132.461	-1.61813	0.225149	-7.18695	6.62531e-13	2.38446e-10	12226	Btg1
158.737	-1.62095	0.538453	-3.01038	0.00260924	0.0461732	22169	Cmpk2
178.111	-1.62128	0.464598	-3.48964	0.000483676	0.0133905	207728	Pde2a
422.866	-1.62224	0.403717	-4.01826	5.86302e-05	0.00264412	20979	Syt1
73.4591	-1.62606	0.438991	-3.70409	0.000212148	0.00730768	18573	Pde1a
197.775	-1.62631	0.315282	-5.15829	2.49219e-07	2.47266e-05	18508	Pax6
274.603	-1.62894	0.327099	-4.97995	6.36018e-07	5.80801e-05	98267	Stk17b
39.4905	-1.63223	0.625281	-2.61039	0.00904398	0.106344	72898	Asphd2
31.8678	-1.6381	0.565922	-2.89457	0.00379683	0.0609186	12287	Cacna1b
50.9181	-1.63882	0.61033	-2.68513	0.00725007	0.0934515	70771	Gpr173
145.915	-1.64274	0.443913	-3.70059	0.000215102	0.00738922	20666	Sox11
1046.89	-1.64578	0.308971	-5.32663	1.0005e-07	1.11298e-05	99887	Tmem56
484.624	-1.6475	0.252489	-6.52501	6.79966e-11	1.50371e-08	209630	Frmd4a
31.6069	-1.66365	0.549847	-3.02566	0.00248089	0.0444261	12933	Crmp1
1136.41	-1.6641	0.283525	-5.86932	4.37585e-09	6.74948e-07	14866	Gstm5
692.72	-1.66762	0.306313	-5.44416	5.20516e-08	6.36938e-06	57738	Slc15a2
32.7101	-1.67151	0.549252	-3.04325	0.00234036	0.042758	626832	Gm6710
96.5242	-1.67565	0.393307	-4.26041	2.04055e-05	0.00112814	211550	Tifa
165.035	-1.68103	0.325859	-5.15876	2.48591e-07	2.47266e-05	17986	Ndp
305.057	-1.68133	0.51034	-3.29454	0.000985827	0.0224502	67087	Ctnnbip1
390.011	-1.68415	0.207041	-8.1344	4.13999e-16	3.16623e-13	212448	9330159F19Rik
42.5496	-1.69029	0.580138	-2.9136	0.00357287	0.0582933	NA	D930015E06Rik
69.9219	-1.69573	0.427022	-3.97106	7.15543e-05	0.00314206	21664	Phlda1
292.15	-1.69613	0.257001	-6.59967	4.12072e-11	9.82282e-09	107771	Bmyc
350.765	-1.70007	0.256803	-6.62015	3.58835e-11	8.66634e-09	13850	Ephx2
29.0061	-1.70981	0.610633	-2.80006	0.00510938	0.074549	67484	Eepd1
92.8491	-1.71168	0.606872	-2.8205	0.00479488	0.0712631	NA	C77370
79.4912	-1.71251	0.506032	-3.38419	0.000713896	0.0177834	327958	Pitpnm3
432.244	-1.71586	0.422519	-4.06102	4.88593e-05	0.00227041	75607	Wnk2
33.8966	-1.71905	0.542651	-3.16788	0.00153555	0.031353	228368	Slc35c1
35.2203	-1.72561	0.657478	-2.62458	0.00867549	0.103739	338365	Slc41a2
95.6526	-1.72678	0.364402	-4.73866	2.15134e-06	0.000170943	66375	Dhrs7
826.747	-1.73075	0.276527	-6.25887	3.87778e-10	7.49228e-08	269831	Tspan12
92.7728	-1.7405	0.366671	-4.74675	2.06706e-06	0.000164961	223726	Mpped1
21.5106	-1.74564	0.63077	-2.76747	0.0056494	0.0794596	20198	S100a4
161.528	-1.74678	0.370249	-4.71784	2.38367e-06	0.000185391	330695	Ctxn1
46.7875	-1.74704	0.523082	-3.33991	0.000838069	0.0200296	71361	Aifm2
31.5242	-1.74979	0.613201	-2.85353	0.00432365	0.0664729	77323	9430041J12Rik
32.5907	-1.75543	0.56209	-3.12304	0.00178996	0.0350263	93707	Pcdhgc4
466.047	-1.75701	0.480011	-3.66035	0.000251867	0.00837757	12268	C4b
65.2312	-1.77113	0.361211	-4.90331	9.42334e-07	8.23644e-05	76429	Lhpp
23.5573	-1.77309	0.561715	-3.15657	0.00159636	0.0322701	71564	Izumo4
41.5801	-1.77459	0.663959	-2.67274	0.00752352	0.0954906	18011	Neurl1a
58.2001	-1.7769	0.451937	-3.93174	8.43322e-05	0.00354214	280645	B3gat2
264.649	-1.77902	0.403087	-4.41349	1.01717e-05	0.000641584	215085	Slc35f1
225.179	-1.77911	0.304289	-5.84676	5.01232e-09	7.47977e-07	100604	Lrrc8c
21.1908	-1.78134	0.65104	-2.73614	0.00621647	0.0848984	78581	Utp23
3011.31	-1.78147	0.251019	-7.09696	1.27532e-12	3.83746e-10	241520	Fam171b
253.985	-1.79405	0.418494	-4.28691	1.81173e-05	0.00102955	71721	Fam13c
257.055	-1.79418	0.376727	-4.76254	1.91168e-06	0.000156383	224090	Tmem44
153.726	-1.79426	0.632086	-2.83864	0.00453063	0.0685007	217258	Abca8a
247.805	-1.80399	0.28874	-6.24782	4.16212e-10	7.95789e-08	99633	Adgrl2
518.749	-1.80415	0.298816	-6.03765	1.56377e-09	2.60937e-07	99470	Magi3
81.943	-1.80654	0.375558	-4.81028	1.50719e-06	0.000126901	20200	S100a6
47.4797	-1.80687	0.688192	-2.62554	0.00865128	0.103719	14407	Gabrg3
2064.85	-1.81531	0.308041	-5.89309	3.79046e-09	5.89609e-07	228357	Lrp4
80.3464	-1.81873	0.460952	-3.9456	7.96004e-05	0.00339783	67220	Plekho1
474.464	-1.83044	0.248015	-7.38039	1.5783e-13	6.43772e-11	NA	Garem
21.5519	-1.83539	0.566169	-3.24177	0.0011879	0.0258926	67676	Rpp21
729.733	-1.83574	0.240433	-7.63515	2.2556e-14	1.14018e-11	52398	2019-09-11
225.979	-1.84116	0.309322	-5.95225	2.64478e-09	4.22131e-07	382034	Gse1
88.0798	-1.84172	0.667173	-2.76049	0.00577149	0.0803761	59095	Fxyd6
52.1403	-1.84269	0.658811	-2.797	0.00515799	0.0750197	80883	Ntng1
50.7089	-1.84943	0.52427	-3.52764	0.000419289	0.0121363	100040792	Gm11627
20.5099	-1.85442	0.632716	-2.93088	0.00337999	0.0558917	76261	0610040J01Rik
39.6398	-1.85672	0.51776	-3.58606	0.00033571	0.0102871	78784	Celf3
22.8641	-1.87825	0.559519	-3.3569	0.000788217	0.019161	68735	Mrps18c
148.449	-1.88939	0.66653	-2.83467	0.00458735	0.069147	21844	Tiam1
15100.6	-1.9012	0.41168	-4.61815	3.87184e-06	0.000282015	13004	Ncan
198.909	-1.9062	0.513887	-3.70938	0.000207766	0.00719538	20743	Sptbn2
613.9	-1.9107	0.244004	-7.8306	4.85547e-15	2.91285e-12	15904	Id4
11948	-1.91345	0.295334	-6.47895	9.23604e-11	2.01819e-08	234267	Gpm6a
107.047	-1.92125	0.426139	-4.50851	6.52839e-06	0.000442172	268595	D430019H16Rik
81.7296	-1.92344	0.539815	-3.56314	0.000366445	0.0109943	242667	Dlgap3
47.6827	-1.92526	0.614795	-3.13154	0.00173891	0.0342097	654820	G530011O06Rik
18.4533	-1.93697	0.746898	-2.59335	0.00950469	0.110387	71643	Zgrf1
209.818	-1.94113	0.446818	-4.34433	1.39699e-05	0.000832523	68203	Diras2
45.0218	-1.94913	0.510843	-3.81552	0.000135895	0.00514301	69642	Mlip
4973.82	-1.95173	0.358346	-5.44649	5.1373e-08	6.32854e-06	19242	Ptn
1301.46	-1.9554	0.373843	-5.23053	1.69026e-07	1.77284e-05	14800	Gria2
94.4543	-1.96172	0.614803	-3.19082	0.0014187	0.0297557	13176	Dcc
3871.27	-1.97597	0.268784	-7.35152	1.95964e-13	7.8194e-11	71306	Mfap3l
43.6815	-1.9789	0.765306	-2.58577	0.00971617	0.111812	14594	Ggta1
24004.8	-1.98391	0.302408	-6.56035	5.36804e-11	1.21642e-08	12876	Cpe
8178.79	-1.99822	0.257998	-7.7451	9.55085e-15	5.3123e-12	268709	Fam107a
637.091	-2.00188	0.259392	-7.71759	1.1855e-14	6.2171e-12	20284	Scrg1
412.135	-2.00539	0.459111	-4.36799	1.25395e-05	0.00075463	67111	Naaa
993.329	-2.01861	0.327623	-6.1614	7.21061e-10	1.3104e-07	73040	2900052N01Rik
76.5216	-2.02121	0.586793	-3.4445	0.00057212	0.0151752	64292	Ptges
77.4978	-2.02132	0.69178	-2.92192	0.00347882	0.0571143	14586	Gfra2
57.1677	-2.02447	0.44217	-4.57848	4.68378e-06	0.00033322	98452	Celrr
35.0898	-2.02701	0.553786	-3.66028	0.000251943	0.00837757	79202	Tnfrsf22
29.6897	-2.03229	0.675528	-3.00844	0.00262594	0.0463008	67434	Ankrd33b
58.2738	-2.03658	0.709307	-2.87122	0.00408887	0.0639823	110886	Gabra5
307.875	-2.04982	0.323821	-6.3301	2.45007e-10	5.05292e-08	93708	Pcdhgc5
69.1629	-2.05147	0.496233	-4.13408	3.56385e-05	0.00173513	13134	Dach1
365.981	-2.06226	0.255422	-8.07391	6.80801e-16	4.99844e-13	18553	Pcsk6
47.4236	-2.06672	0.732567	-2.8212	0.00478441	0.0712228	269994	Gsg1l
1330.08	-2.08038	0.193861	-10.7313	7.2564e-27	1.33191e-23	23965	Tenm3
1059.37	-2.0804	0.292839	-7.10425	1.20979e-12	3.76368e-10	54725	Cadm1
46.9032	-2.08652	0.711324	-2.9333	0.00335384	0.0556095	219134	Shisa2
51.1091	-2.09067	0.439119	-4.76105	1.92586e-06	0.000156412	239188	Enox1
24.1307	-2.09357	0.62809	-3.33323	0.000858443	0.0203575	100039138	Gm2061
41.5912	-2.10361	0.61601	-3.41489	0.000638077	0.0163574	80906	Kcnip2
40.2287	-2.11886	0.689427	-3.07336	0.00211663	0.0395226	268480	Rapgefl1
365.441	-2.12953	0.252425	-8.43629	3.27582e-17	2.61424e-14	107895	Mgat5
520.556	-2.13441	0.323869	-6.59034	4.38832e-11	1.01959e-08	218461	Pde8b
375.81	-2.15133	0.356003	-6.04301	1.51266e-09	2.54723e-07	223227	Sox21
70.96	-2.15928	0.537313	-4.01866	5.85309e-05	0.00264412	233071	Arhgap33
163.94	-2.16279	0.383563	-5.63868	1.71355e-08	2.3298e-06	20947	Swap70
54.8584	-2.16449	0.772312	-2.8026	0.00506918	0.0740213	243911	Kirrel2
438.622	-2.17052	0.348683	-6.22491	4.81832e-10	9.02451e-08	268977	Ltbp1
57.4199	-2.18225	0.667929	-3.26719	0.00108622	0.0240791	57875	Angptl4
154.355	-2.18349	0.423851	-5.15153	2.58365e-07	2.53598e-05	19771	Rlbp1
17.9415	-2.1871	0.785231	-2.78529	0.00534794	0.0767486	230787	Themis2
388.276	-2.18865	0.31995	-6.84058	7.88743e-12	2.0682e-09	NA	1810041L15Rik
177.865	-2.19087	0.471239	-4.64918	3.33262e-06	0.00024866	106648	Cyp4f15
87.3645	-2.22512	0.503504	-4.41927	9.90366e-06	0.000626833	76487	Ppp1r3g
1127.71	-2.23409	0.337183	-6.62576	3.45457e-11	8.45448e-09	17289	Mertk
36.4296	-2.24509	0.587926	-3.81866	0.000134178	0.00512026	12580	Cdkn2c
28.7086	-2.25563	0.751595	-3.00112	0.00268985	0.047112	23948	Mmp17
37.2329	-2.25903	0.814185	-2.77459	0.00552713	0.0782888	243499	Lrrtm4
78.7662	-2.26198	0.316409	-7.14892	8.7464e-13	2.97297e-10	171567	Nme7
947.077	-2.26406	0.398761	-5.67773	1.36492e-08	1.92716e-06	58175	Rgs20
16.3503	-2.26517	0.836036	-2.70942	0.00674016	0.0894545	544922	Zkscan4
59.2627	-2.26922	0.459962	-4.93349	8.07732e-07	7.26761e-05	244310	Dlgap2
23.2208	-2.27199	0.821371	-2.76609	0.0056733	0.0796736	237553	Trhde
171.697	-2.28507	0.401739	-5.68793	1.28587e-08	1.84391e-06	26377	Dapp1
201.462	-2.28729	0.356745	-6.41155	1.44044e-10	3.07433e-08	212167	Gsap
61.9948	-2.29108	0.551068	-4.15754	3.21698e-05	0.00161774	269132	Colgalt2
14.2993	-2.2968	0.845215	-2.71742	0.00657935	0.0880415	14724	Gp1bb
63.3258	-2.32453	0.531451	-4.37393	1.22027e-05	0.000739211	73230	Bmper
24.5789	-2.34097	0.712909	-3.28368	0.0010246	0.0230654	107448	Unc5a
45.8642	-2.34191	0.641343	-3.65157	0.000260642	0.00854301	12794	Cnih2
1581.3	-2.35319	0.442066	-5.32316	1.01978e-07	1.12759e-05	66643	Lix1
97.3237	-2.35706	0.692902	-3.40172	0.000669637	0.0170238	21898	Tlr4
289.036	-2.36287	0.50653	-4.66483	3.08875e-06	0.000231404	NA	Ptchd2
232.91	-2.36658	0.527846	-4.48348	7.34368e-06	0.000488381	214931	Fbxl16
1050.63	-2.36943	0.271261	-8.73488	2.43923e-18	2.35643e-15	23945	Mgll
57.3167	-2.37256	0.579724	-4.09256	4.26634e-05	0.00203929	14544	Gda
269.2	-2.37661	0.434564	-5.46896	4.52689e-08	5.61426e-06	54712	Plxnc1
4667	-2.38186	0.318364	-7.48154	7.34566e-14	3.37074e-11	13371	Dio2
374.68	-2.38342	0.535889	-4.4476	8.68349e-06	0.000561216	14585	Gfra1
18.0175	-2.39469	0.760138	-3.15034	0.00163082	0.032786	208171	Tmprss7
85.3233	-2.39792	0.513203	-4.67245	2.97622e-06	0.000224809	73728	Psd
40.2868	-2.41668	0.682049	-3.54326	0.000395216	0.0116253	239556	Cacna1i
27.9458	-2.42067	0.848397	-2.85323	0.00432771	0.0664729	12609	Cebpd
104.003	-2.43572	0.672289	-3.62303	0.000291172	0.00931092	12801	Cnr1
135.099	-2.45621	0.877515	-2.79905	0.00512529	0.0747217	320405	Cadps2
176.423	-2.46269	0.375664	-6.55557	5.5428e-11	1.24071e-08	100503040	Gm19522
22.3991	-2.4773	0.892015	-2.7772	0.005483	0.0779782	12669	Chrm1
100.915	-2.48388	0.484759	-5.12394	2.99223e-07	2.90595e-05	94109	Csmd1
147.085	-2.48855	0.465913	-5.34124	9.23128e-08	1.03951e-05	14812	Grin2b
17.8973	-2.48872	0.937098	-2.65577	0.00791278	0.0985339	76933	Ifi27l2a
364.252	-2.50446	0.342704	-7.30794	2.71265e-13	1.03731e-10	12390	Cav2
19820.3	-2.51706	0.314714	-7.99792	1.26537e-15	8.93305e-13	20512	Slc1a3
27.8834	-2.51766	0.726056	-3.46758	0.000525173	0.0142386	623279	Dok6
27.4754	-2.57231	0.703147	-3.65829	0.000253906	0.00839718	13840	Epha6
2291.98	-2.57392	0.455274	-5.65357	1.5715e-08	2.16879e-06	108069	Grm3
19.4696	-2.59553	0.989482	-2.62312	0.0087129	0.103805	108068	Grm2
317.214	-2.63778	0.530073	-4.97627	6.48223e-07	5.86353e-05	245684	Cnksr2
399.68	-2.6491	0.308939	-8.57483	9.92344e-18	8.67356e-15	19419	Rasgrp1
99.7611	-2.65225	0.362728	-7.31194	2.6332e-13	1.02835e-10	109857	Cbr3
105.972	-2.66655	0.427614	-6.23589	4.49216e-10	8.50036e-08	102644	Oaf
11.8535	-2.70364	0.940639	-2.87426	0.0040498	0.0635333	NA	2410016O06Rik
1207.08	-2.70615	0.404112	-6.69654	2.13419e-11	5.36617e-09	231014	9330182L06Rik
65.3106	-2.71074	0.573959	-4.72289	2.32514e-06	0.000181608	244579	Tox3
33.3065	-2.71266	0.658646	-4.11854	3.81286e-05	0.00185146	553095	Gm17750
19.6201	-2.72083	0.753587	-3.6105	0.000305609	0.00958909	106344	Rfc4
39.1615	-2.7323	0.549074	-4.97619	6.48486e-07	5.86353e-05	320825	Samd5
34.3225	-2.73512	0.931175	-2.93727	0.00331111	0.0551502	70536	Qpct
45.7803	-2.74106	0.559731	-4.89711	9.72545e-07	8.42032e-05	14025	Bcl11a
621.528	-2.75794	0.398971	-6.91264	4.75713e-12	1.28407e-09	329274	Fam163a
100.534	-2.76249	0.449363	-6.14757	7.86784e-10	1.41582e-07	NA	Fam69c
268.997	-2.76375	0.397736	-6.94871	3.68641e-12	1.02521e-09	225187	Ankrd29
1344.37	-2.78002	0.388011	-7.16481	7.78921e-13	2.69757e-10	17304	Mfge8
67.6361	-2.7828	0.625368	-4.44986	8.59283e-06	0.000557319	109349	Fam163b
294.852	-2.78912	0.455425	-6.12422	9.11317e-10	1.60839e-07	66297	Pantr1
135.226	-2.79532	0.888618	-3.14569	0.00165693	0.0330276	20357	Sema5b
76.9307	-2.80269	1.0371	-2.70244	0.00688323	0.0908916	72003	Synpr
11316.3	-2.81256	0.260452	-10.7987	3.48961e-27	7.92338e-24	21912	Tspan7
12.9927	-2.81443	0.950721	-2.96031	0.00307327	0.0524256	26757	Dpysl4
6345.03	-2.81574	0.280388	-10.0423	9.93569e-24	1.51975e-20	14681	Gnao1
99.393	-2.82072	0.509516	-5.53607	3.09327e-08	4.02673e-06	15208	Hes5
436.729	-2.82814	0.49041	-5.7669	8.0742e-09	1.16694e-06	320343	Lypd6
355.533	-2.83423	0.513785	-5.51638	3.46061e-08	4.44192e-06	208151	Tmem132b
56.7714	-2.84017	0.722779	-3.92952	8.51171e-05	0.00355883	109593	Lmo3
335.949	-2.84979	0.713779	-3.99254	6.53706e-05	0.00289825	219151	Scara3
162.234	-2.85519	0.365235	-7.81742	5.39165e-15	3.09262e-12	242274	Lrrc7
409.323	-2.85766	0.479282	-5.96238	2.48584e-09	4.00242e-07	13839	Epha5
1647.4	-2.86433	1.07787	-2.6574	0.00787468	0.0985127	103712	6330403K07Rik
278.81	-2.86488	1.06359	-2.6936	0.00706852	0.0923435	20317	Serpinf1
44.8001	-2.86705	0.77209	-3.71336	0.000204525	0.00710995	56312	Nupr1
98.533	-2.87869	0.78636	-3.66078	0.000251445	0.00837757	71799	Ptcd1
122.697	-2.87974	0.436542	-6.59672	4.20363e-11	9.89201e-09	18423	Otx1
47.9736	-2.93188	0.780116	-3.75826	0.000171102	0.00621897	245683	Klhl34
1971.9	-2.93858	0.384997	-7.63273	2.29838e-14	1.14018e-11	19281	Ptprt
26.6671	-2.94303	0.846221	-3.47785	0.000505447	0.0138677	620695	Gm13889
23.6193	-2.95672	0.884539	-3.34267	0.000829762	0.019857	240776	Kcnt2
1105.83	-2.96946	0.384199	-7.72897	1.0842e-14	5.85309e-12	29873	Cspg5
31.0514	-2.9905	1.10788	-2.69931	0.00694831	0.0914239	72293	Nkd2
82.0361	-2.99933	0.763037	-3.93078	8.46715e-05	0.00354828	69239	Pdzph1
18.2511	-3.00221	0.896443	-3.34902	0.000810981	0.0195093	72978	Cnih3
19.151	-3.0183	0.985084	-3.064	0.00218401	0.0404924	26358	Aldh1a7
22.228	-3.03553	1.07698	-2.81855	0.00482418	0.0715249	242702	Myom3
47.2267	-3.04515	0.573948	-5.30562	1.12292e-07	1.22686e-05	319586	Celf5
23.295	-3.04712	0.791597	-3.84934	0.000118438	0.00462539	319781	9530051G07Rik
357.415	-3.05171	0.478128	-6.38262	1.74085e-10	3.67279e-08	81879	Tfcp2l1
8.76478	-3.08512	1.17979	-2.61497	0.00892364	0.105401	12571	Cdk6
81.182	-3.09762	0.724205	-4.27727	1.89195e-05	0.00106198	74020	Cpne4
57.5141	-3.11005	0.611294	-5.08765	3.62519e-07	3.48379e-05	12297	Cacnb3
4595.04	-3.11636	1.01982	-3.0558	0.00224459	0.0414065	12140	Fabp7
180.157	-3.1171	0.414372	-7.52246	5.37567e-14	2.53001e-11	14168	Fgf13
11.402	-3.12412	0.994757	-3.14059	0.00168609	0.0334214	228550	Itpka
104.53	-3.13635	0.496435	-6.31775	2.65397e-10	5.32766e-08	72961	Slc17a7
10.9179	-3.14206	1.15853	-2.71212	0.00668543	0.0889466	22376	Was
53.445	-3.15262	0.957107	-3.2939	0.00098806	0.0224732	19892	Rpe65
250.925	-3.18067	0.853694	-3.72578	0.000194715	0.00685988	15360	Hmgcs2
43.9761	-3.19305	0.628338	-5.08174	3.73985e-07	3.55674e-05	225743	Rnf165
629.179	-3.20953	1.00968	-3.17877	0.00147903	0.0304345	17096	Lyn
61.5213	-3.2358	1.20364	-2.68834	0.00718082	0.0930819	245650	Gucy2f
219.865	-3.24494	0.521478	-6.22258	4.89036e-10	9.06693e-08	223332	Ranbp3l
7.56638	-3.25552	1.23544	-2.63511	0.00841108	0.102039	434130	Ccdc8
1343.82	-3.28055	0.38417	-8.53931	1.35031e-17	1.12659e-14	23792	Adam23
22.906	-3.36446	0.913402	-3.68344	0.000230109	0.00779272	319508	Syt15
476.423	-3.39425	0.314607	-10.7889	3.88507e-27	7.92338e-24	16526	Kcnk2
84.6429	-3.42801	0.592098	-5.78959	7.05568e-09	1.04441e-06	12424	Cck
90.7543	-3.45769	0.465485	-7.42815	1.1013e-13	4.78109e-11	21923	Tnc
70.6737	-3.4735	1.10646	-3.13929	0.00169358	0.0334974	654805	F930015N05Rik
14.1553	-3.50101	1.30255	-2.68782	0.00719205	0.0931306	12919	Crhbp
179.171	-3.50489	0.492886	-7.11095	1.15244e-12	3.64709e-10	12614	Celsr1
4411.5	-3.50794	0.271774	-12.9075	4.08115e-38	1.49819e-34	54371	Chst2
923.996	-3.52436	0.223231	-15.788	3.76527e-56	3.45557e-52	13131	Dab1
209.744	-3.54539	0.357719	-9.91112	3.72466e-23	5.25893e-20	216439	Agap2
87.4874	-3.58423	0.659436	-5.4353	5.47052e-08	6.60732e-06	16774	Lama3
9.62515	-3.5885	1.28671	-2.78889	0.00528895	0.0761999	54376	Cacng3
19.3415	-3.66246	0.960728	-3.81217	0.000137751	0.0052025	66373	Lsm5
13.1259	-3.66871	1.10755	-3.31247	0.000924758	0.0215953	93728	Pabpc5
70.1049	-3.68027	0.705572	-5.216	1.82826e-07	1.88527e-05	18752	Prkcg
13.2566	-3.68066	1.13794	-3.23448	0.00121865	0.0263156	12123	Hrk
613.043	-3.68202	0.400926	-9.18379	4.1617e-20	5.09254e-17	170638	Hpcal4
25.9743	-3.68525	1.12083	-3.28797	0.00100913	0.022811	21375	Tbr1
130.028	-3.68782	0.516463	-7.14054	9.29626e-13	3.10241e-10	15234	Hgf
11.3312	-3.71008	1.20568	-3.07718	0.00208969	0.0392192	433424	Zeb2os
104.703	-3.82714	0.577043	-6.63232	3.3044e-11	8.19625e-09	219257	Pcdh20
25.363	-3.83942	0.943173	-4.07074	4.68632e-05	0.00219993	212518	Sprn
97.4313	-3.8623	0.983358	-3.92766	8.57752e-05	0.00357008	NA	Fam84a
74.9181	-3.87334	1.10885	-3.49313	0.000477398	0.0132767	109594	Lmo1
26.3692	-3.88187	0.977387	-3.97169	7.13657e-05	0.00314129	27028	Ermap
44.1434	-3.91146	0.770065	-5.07939	3.7864e-07	3.56407e-05	235604	Camkv
105.446	-3.97766	0.580956	-6.84675	7.55484e-12	2.0097e-09	30937	Lmcd1
7.15559	-4.02566	1.50018	-2.68345	0.00728669	0.0936575	319562	9630028B13Rik
7.25109	-4.05151	1.39329	-2.90786	0.00363911	0.0590069	22068	Trpc6
38.848	-4.06722	0.740475	-5.49272	3.95801e-08	4.97598e-06	58208	Bcl11b
7.61613	-4.07811	1.57511	-2.5891	0.00962274	0.111085	329421	Myo3b
3.77291	-4.10552	1.45018	-2.83104	0.00463973	0.0696908	380768	Ccdc177
37.7674	-4.21574	0.999497	-4.21786	2.46632e-05	0.00131633	NA	Ppapdc1a
8.90129	-4.28979	1.40848	-3.04568	0.00232151	0.0425263	NA	E130012A19Rik
49.7484	-4.32666	0.731627	-5.91375	3.34413e-09	5.24628e-07	58227	Fam184b
4.66589	-4.40991	1.56976	-2.8093	0.00496499	0.0730228	12672	Chrm4
742.562	-4.48525	0.26638	-16.8378	1.28942e-63	2.36673e-59	104174	Gldc
1513.93	-4.51998	0.496519	-9.10334	8.75953e-20	9.45772e-17	50781	Dkk3
5.20501	-4.55561	1.58749	-2.86968	0.00410882	0.064076	100036537	Gm11149
5.26832	-4.56237	1.48372	-3.07496	0.0021053	0.0394315	67293	3110039M20Rik
33.6184	-4.61035	1.25471	-3.67444	0.000238374	0.00802819	320563	Islr2
10.8749	-4.62929	1.4402	-3.21434	0.00130743	0.0279369	102278	Cpne7
20.875	-4.63116	1.18905	-3.89483	9.82678e-05	0.00400824	329513	A730036I17Rik
5.76831	-4.72419	1.77746	-2.65783	0.0078645	0.0985127	239766	Rtp1
301.836	-4.7322	0.918018	-5.1548	2.53904e-07	2.50559e-05	12561	Cdh4
5.99851	-4.77449	1.79871	-2.65439	0.00794511	0.0987357	277773	Fam205c
6.55692	-4.87889	1.76636	-2.76212	0.00574281	0.0801284	67666	Hapln3
6.60759	-4.91392	1.43482	-3.42476	0.000615345	0.0159824	16520	Kcnj4
6.72722	-4.91772	1.62616	-3.02412	0.00249354	0.0445657	240058	Cpne5
6.68479	-4.92316	1.8104	-2.71937	0.00654062	0.0878224	60322	Chst7
416.455	-4.92476	0.42389	-11.618	3.33826e-31	8.75338e-28	26938	St6galnac5
6.7665	-4.93295	1.44273	-3.41918	0.000628105	0.0161695	282619	Sbsn
6.7332	-4.95369	1.57052	-3.15417	0.00160958	0.0325014	77220	Tmem200a
6.89408	-4.96753	1.75904	-2.824	0.00474279	0.0708909	331480	Gm5126
7.25356	-5.0583	1.47575	-3.42762	0.000608897	0.015898	77558	9330179D12Rik
7.5895	-5.1209	1.57583	-3.24965	0.00115546	0.0254299	98970	Fibcd1
15.5311	-5.14991	1.45386	-3.54224	0.000396751	0.0116518	15898	Icam5
8.20769	-5.22219	1.41242	-3.69733	0.000217877	0.00746107	19288	Ptx3
780.606	-5.22792	0.368261	-14.1962	9.66698e-46	4.43593e-42	12950	Hapln1
8.27833	-5.24691	2.00031	-2.62304	0.00871489	0.103805	665268	1600029O15Rik
9.00356	-5.3575	1.38537	-3.8672	0.00011009	0.00436438	100043757	Zfp831
9.15273	-5.36385	1.36733	-3.92287	8.74998e-05	0.00362541	71235	4933427I22Rik
9.25257	-5.39949	2.00796	-2.68903	0.0071659	0.0930819	NA	Wisp1
77.9257	-5.51641	0.902687	-6.1111	9.89445e-10	1.72964e-07	241556	Tspan18
10.2389	-5.54563	1.54095	-3.59885	0.000319631	0.00994379	15565	Htr6
22.3412	-5.71718	1.50906	-3.78858	0.00015151	0.0056409	67874	Rprm
12.0316	-5.77462	1.6145	-3.57672	0.000347927	0.0106083	170786	Cd209a
2478.5	-5.82679	0.735138	-7.92612	2.26102e-15	1.48218e-12	12322	Camk2a
12.6072	-5.8428	1.63483	-3.57396	0.000351626	0.0106679	13390	Dlx1
25.7851	-5.85918	2.15146	-2.72335	0.00646229	0.0871178	22045	Trhr
15.8398	-6.17177	2.16565	-2.84984	0.0043741	0.0670172	225872	Npas4
19.0257	-6.43656	2.34755	-2.74182	0.00610993	0.0838175	11694	Alx3
19.56	-6.46408	1.6003	-4.03929	5.36135e-05	0.00246636	278795	Lrrc10b
42.954	-6.64926	1.23444	-5.38647	7.18545e-08	8.3522e-06	240055	Neurl1b
22.6256	-6.67204	1.35798	-4.91319	8.9606e-07	7.9455e-05	328235	Gm5083
200.408	-6.96161	1.67236	-4.16275	3.14432e-05	0.00159135	20378	Frzb
27.4556	-6.96848	1.38824	-5.01963	5.17698e-07	4.79917e-05	382571	Kcnf1
27.7304	-6.9695	1.29337	-5.38864	7.09934e-08	8.3522e-06	100043450	AA387883
27.7257	-6.9823	1.2445	-5.61055	2.0169e-08	2.68262e-06	242620	Dmrta2
28.9766	-7.03108	1.56709	-4.48671	7.23322e-06	0.000482785	12971	Crym
28.8913	-7.04527	1.55568	-4.52873	5.93399e-06	0.000403402	107376	E330013P04Rik
33.1636	-7.23371	1.3395	-5.40031	6.65269e-08	7.92923e-06	16512	Kcnh3
34.0577	-7.27814	1.51514	-4.80361	1.55831e-06	0.000130606	20311	Cxcl5
488.469	-7.36241	0.623768	-11.8031	3.76064e-32	1.15044e-28	21907	Nr2e1
36.4117	-7.3717	1.33518	-5.52111	3.36859e-08	4.35426e-06	319251	9630001P10Rik
42.9064	-7.61088	1.42666	-5.33477	9.56678e-08	1.07072e-05	320038	Dlx6os1
48.2705	-7.78399	1.20702	-6.44893	1.12643e-10	2.43243e-08	11878	Arx
67.7759	-8.26889	2.69532	-3.06787	0.00215591	0.0401234	170677	Cdhr1
1330.23	-8.45941	0.928199	-9.11379	7.95516e-20	9.12606e-17	83453	Chrdl1
79.4154	-8.49626	1.52901	-5.5567	2.74929e-08	3.63045e-06	329078	Emx2os
1146.66	-8.73143	0.59968	-14.5602	5.03446e-48	3.08025e-44	16870	Lhx2
110.966	-8.98036	1.20933	-7.42591	1.12006e-13	4.78109e-11	77382	C030018K13Rik
230.83	-9.05815	1.43773	-6.30029	2.97087e-10	5.8011e-08	13797	Emx2
126.025	-9.1624	1.29019	-7.10159	1.2333e-12	3.77286e-10	13199	Ddn
127.707	-9.18426	1.30455	-7.04017	1.92009e-12	5.59417e-10	54713	Fezf2
339.508	-10.5943	1.20593	-8.78516	1.56149e-18	1.59228e-15	15228	Foxg1
