# Supplementary material for: Regionally Distinct Astrocytes Display Unique Transcription Factor Profiles in the Adult Brain
Source: Front Neurosci. 2020 Feb 21;14:61. doi: 10.3389/fnins.2020.00061 (PMC7046629; doi:10.3389/fnins.2020.00061)
Supplement: Supplementary file 2 [file Table_1.xlsx]

## Sheet: Data Sheet 1
Supplementary Table S1: Average normalized expression of known astrocyte and neuron genes from astrocytes across regions
Gene	Bulb	Hippo	Cortex	Stem
Slc1a2	15.4353	15.3504	15.9521	15.9658
Atp1a2	15.2512	14.9157	15.8048	15.5949
Glul	15.4586	14.9737	15.4621	13.8594
Aldoc	14.3867	14.5266	14.9693	14.531
Ptprz1	14.932	14.1575	14.723	13.5024
Slc4a4	14.7256	14.0589	14.2363	14.5039
Slc1a3	14.6401	14.3555	14.991	12.126
Aqp4	13.6199	12.8888	13.4128	13.7739
Tmem47	13.3291	13.5572	13.3284	12.8044
Nfia	12.1178	12.576	12.7212	12.1488
Ptn	12.9184	11.6761	13.0391	10.6546
Dio2	12.4757	11.9982	13.1775	10.1663
Pla2g7	12.4051	11.9954	11.9856	12.0718
Fabp7	13.8098	9.9674	10.2082	9.44813
Gja1	12.1115	11.9268	12.3759	11.5719
S100b	11.6325	11.2029	11.822	12.203
Acsbg1	11.9096	11.2081	11.9517	11.5373
Adcyap1r1	11.2571	11.5459	12.1491	11.4364
Mlc1	11.8131	11.4633	11.9765	10.9873
Ntsr2	11.6097	11.3294	11.986	11.3963
Hlf	11.8524	11.2704	11.9252	10.2926
Fut9	11.2314	11.4859	11.8319	11.1683
Bcan	11.4926	10.9415	11.9086	11.173
Slc39a12	11.1541	11.2095	11.6651	11.5123
Slc7a2	11.6742	11.0427	11.727	10.7748
Grm3	10.5861	11.3752	12.4428	8.96184
Gfap	11.7755	11.8426	10.1026	10.507
Kcnj16	11.4217	10.596	10.7991	11.271
Fgfr3	10.6951	10.9222	11.4687	10.9891
Gpc5	11.064	11.025	11.4097	10.3333
Ppp1r3c	10.2289	11.232	11.5574	10.6119
Gjb6	10.6959	10.9387	11.1752	11.1294
Sox9	10.5744	10.9961	11.3792	10.5709
Lsamp	10.6806	10.7764	11.228	10.6657
Htra1	10.968	10.6618	11.1049	10.2178
Eps8	10.6267	10.7694	10.9164	10.2628
Pbxip1	10.1124	10.5546	11.0573	10.4458
Arrb1	10.6981	10.3865	10.9593	10.0149
Chrdl1	11.5032	8.40019	11.2571	2.37643
Slc25a18	10.9352	10.1368	10.6714	9.93334
Slc14a1	10.6527	10.5239	10.185	10.2962
Elovl2	10.8259	9.97411	10.5442	10.2046
Tlr3	10.3429	10.1987	10.7073	10.2917
Gabrg1	9.84991	10.2163	10.9577	10.0313
Mertk	9.76154	10.5101	11.1384	8.25675
Bmpr1b	9.85989	10.3983	10.6624	9.80432
Egfr	9.83134	9.76189	10.7101	9.95466
Phactr2	9.01693	10.0816	9.42404	10.9638
Cldn10	9.79446	9.99728	10.3582	9.57592
Abcd2	9.35298	9.96324	10.487	9.78839
Atp8a1	9.80752	9.94209	10.2011	9.8233
Aldh1l1	9.90556	9.57702	10.2041	9.7235
Slco1c1	8.22549	10.2993	10.308	9.75714
Acot11	9.9458	9.52983	10.0375	9.76216
Slc9a3r1	9.8407	9.79499	10.428	8.83744
Adcy2	9.51932	9.79296	10.5344	8.93155
Pde4b	9.93941	9.60911	9.88315	9.7652
Gli3	9.23545	9.91845	10.5161	8.74044
Hapln1	9.73297	9.89327	10.5977	4.7651
Vcam1	8.68316	9.99585	10.1948	9.51559
Grin3a	10.7892	8.45174	8.80788	9.58385
Rfx4	9.62469	9.51376	10.0623	9.47824
Lonrf3	9.51183	9.89256	10.0226	9.13174
Adhfe1	9.53102	9.54163	10.0042	9.1293
Gldc	10.1882	9.83699	9.80375	5.51081
F3	9.56356	9.50871	9.7343	9.20145
Pygm	9.57792	8.88881	8.87256	10.2192
Slc15a2	9.96696	9.28191	9.92413	8.0713
Id4	9.22659	9.67248	9.88704	7.6767
Agt	7.95613	8.52323	8.11529	10.6735
Fjx1	8.16048	8.98518	10.4499	7.9074
Grin2c	9.31559	9.17329	9.8077	8.01491
Rgs7bp	8.90468	8.92705	9.46709	9.33043
Gucy1a3	8.90587	9.35367	9.59218	8.67814
Hsd11b1	6.78762	9.5835	9.03443	9.44534
Gabra2	8.57613	8.84182	9.23022	9.20006
Emp2	7.58635	9.19151	9.67023	8.45855
Cbs	8.68101	9.04902	9.10748	8.42482
Pdk4	8.17966	8.96092	9.31973	8.52125
Thrsp	8.14098	9.20824	8.77856	8.18054
Tlcd1	8.45705	8.20486	9.15247	8.59172
Ttpa	8.98711	8.24366	8.64016	8.3921
Slc30a10	8.64635	8.43796	9.29623	7.32971
Kcnn2	7.99478	8.87416	8.39987	8.52346
Arpp21	8.72937	7.87201	9.13761	7.55964
Slc7a10	8.20952	8.19372	8.24995	8.97871
Chst1	7.58036	8.37763	9.11822	7.87525
Plcd4	8.27341	8.41561	8.66174	7.56647
Nrarp	8.76496	7.88248	8.57051	7.45031
Car8	5.12645	6.98854	9.84739	6.1721
Egfl6	5.76306	7.66804	8.9221	8.43738
Slc13a5	8.28388	7.66648	8.84911	6.81943
Ngef	7.72275	8.14244	8.72957	7.3294
Mgst1	8.72758	7.68356	7.5554	7.98476
Prodh	7.42381	8.09137	8.59989	7.59824
Aifm3	7.83073	7.68816	7.79632	8.11772
Entpd2	7.71164	7.57411	8.36902	7.48985
Sema4a	8.07855	7.69209	7.98748	7.30652
Fmo1	8.91343	6.13655	7.41719	6.78041
Cybrd1	8.53353	7.56877	7.03757	6.87336
Grid2	7.32586	7.03191	8.092	7.80214
Dmp1	7.12916	6.83565	7.95343	7.95953
Cyp4f15	8.17163	7.30762	7.85993	5.6592
Fzd2	7.47367	7.20051	8.26446	6.20479
Kcne1l	8.21275	6.46969	6.71195	7.73118
Rlbp1	7.86898	6.98997	7.9192	5.44989
Tagln3	7.56762	7.11921	7.52202	6.76564
Pcdh20	7.57069	6.51955	7.10205	3.3879
Dcc	5.42328	6.95077	7.80321	4.94534
Hes5	7.33399	6.67859	6.92729	4.287
Adora2b	6.66649	6.3996	6.79467	6.5176
Ppp1r3g	6.0045	6.66438	7.61592	4.5806
Tnc	6.87313	6.97927	6.85535	3.60588
Thbs4	0.199821	7.67109	6.14078	1.07267
St6galnac2	3.86444	6.84311	4.42962	6.98297
Ccdc80	6.4895	5.02747	5.97655	5.70563
Gm266	4.66218	5.61941	6.11993	4.91762
Syt13	3.10569	4.82517	5.544	5.5764
Myoc	1.70211	5.59355	4.6377	3.21733
Camk2b	8.61367	7.92597	7.84383	7.64013
Vsnl1	6.11233	8.00869	8.3466	9.14151
Pgm2l1	6.59846	7.67751	8.10478	7.64757
Napb	7.76723	7.08939	7.29506	7.76111
Camk4	6.71513	7.30234	7.81255	7.62041
Nefl	5.07065	6.67676	7.33776	8.7314
Htr2c	2.73048	9.45518	5.7598	9.84009
Slc12a5	6.99043	6.42787	7.31555	6.71961
Pcsk2	6.16392	7.01896	6.66018	7.28913
Sv2b	6.35967	6.87794	6.90749	6.3658
L1cam	6.78486	6.5189	6.63398	5.92514
Stmn2	5.6647	5.44873	6.6611	7.43858
Rgs4	5.04992	6.84269	6.72116	6.00135
Cck	7.46954	6.07547	6.364	3.42904
Myo5b	2.65221	7.64333	4.7948	7.96346
Epha7	5.942	6.4281	5.97703	4.68049
Gap43	5.11901	5.03921	6.68728	6.0054
Tmem130	5.8364	5.79349	5.16645	5.67255
Clstn2	5.54561	6.07052	4.52878	6.24442
Gda	6.38238	5.59081	6.60444	3.7733
Ttc9	4.2434	5.89721	4.80198	6.36533
Cxadr	5.75581	5.97164	3.08869	6.38702
Kcnc2	5.5725	5.428	4.94646	4.35203
Cacna1b	5.31859	5.07676	5.49342	3.71805
Cyb561	1.21292	6.59952	4.27237	7.07064
Nefm	2.85222	3.94259	5.12126	7.2327
Vgf	3.812	5.43115	5.37032	4.20433
Satb2	3.89044	4.0637	5.83573	3.49029
Slc17a6	4.15906	4.90511	1.83034	5.8659
Trhde	5.61013	4.16977	4.14622	2.69949
Calb1	3.57575	3.08471	4.91982	4.45532
Lpl	1.78081	5.25874	2.20155	5.86611
Nell1	4.58629	3.51902	3.52477	3.09873
Plcxd3	4.14684	1.68904	2.77305	4.36634
Icam5	4.92086	4.16625	3.58489	-0.511312
Kcnf1	6.16411	4.41191	3.52477	-2
Slc6a7	3.33812	2.89742	2.38623	3.18564
Glra2	2.78483	3.17904	1.54993	3.92904
Gpr88	0.318895	2.43709	5.84483	0.0721829
Npas4	5.63499	2.41122	2.20155	-2
Dlx1	5.23324	1.88174	2.88544	-2
Hs3st2	4.13611	-0.96388	2.97802	1.75392
Prdm8	-2	4.16682	2.97802	0.809149
Nts	-2	2.29202	-0.383414	0.453514
